# Supplementary material for: Cleavage of histone H2A during embryonic stem cell differentiation destabilizes nucleosomes to counteract gene activation
Source: J Biol Chem. 2026 Apr 9;302(6):111437. doi: 10.1016/j.jbc.2026.111437 (PMC13156748; doi:10.1016/j.jbc.2026.111437)
Supplement: Data S6 [file mmc9.xlsx]

## Sheet: H2AK5ac_K9ac
Protein IDs	iBAQ H2AK5aK9ac_rep1	H2AK5aK9ac_rep2	H2AK5aK9ac_rep3	H2A_rep1	H2A_rep2	H2A_rep3	log2 fold change	p-value
Phf10	2.74973	0.879334	0.970016	-3.09772	-3.9464	-1.60018	4.41446	6.86721
Smarcb1	3.92208	2.59473	2.59688	1.07096	-1.10347	-0.372143	3.17278	6.05426
Pbrm1	4.22566	3.03385	3.17858	1.15097	-2.35087	-0.202054	3.94668	5.49907
Il1rap		-2.71476	-2.89544		-3.6137	-3.8446	0.924052	5.36545
Atp1a1;Atp1a3;Atp1a2;Atp4a		-0.432395	-1.66972		-4.52124	-4.91594	3.66753	5.06132
Zbtb48		3.60317	3.2895		2.67225	2.62697	0.79672	4.74253
Tuba1b;Tuba1c;Tuba1a;Tuba3a;Tuba8		3.0244	3.01312		2.57406	2.35238	0.555539	4.73039
Rpl18	4.03943	2.40297	2.82014	4.30531	4.68285	5.09754	-1.60772	4.60062
Eef1a1;Eef1a2		2.57664	2.69334		1.53153	1.92186	0.908291	4.41753
Smarcd1	5.82427	3.45882	3.97275	2.94082	-0.0363212	0.779062	3.19076	4.34659
Brd7	5.7806	1.73039	2.73267	0.756202	-1.67032	-0.612962	3.92358	4.34301
Rpl18a	1.79249	-1.29122	-0.811947	1.94719	2.89061	3.30547	-2.81799	4.22684
Smarce1	4.86458	2.81615	3.44604	1.76426	-3.30932	-0.0805079	4.25078	4.1394
Hdac1;Hdac2		-2.86153	-2.33389		-3.79719	-3.54659	1.07418	3.9078
Rpl13	6.95535	5.71989	6.24235	7.89224	6.85093	7.27268	-1.03275	3.43779
Actl6a	5.9117	3.16376	3.21992	3.15716	-0.703426	0.518787	3.10762	3.32599
Rpl10a	4.28646	1.84559	1.27752	4.77365	4.61381	4.05345	-2.01044	3.30219
Rplp2	6.05052	3.85058	3.34432	6.41258	6.98172	5.6428	-1.93056	3.27961
Ptrf	-0.151042	-1.28449	-1.30031	-1.59765	-1.62905	-2.18625	0.89237	3.26315
Upp2	1.5251		0.64448	-0.333821	-1.71528	0.0369689	1.7555	3.25465
Tbp		2.48987	2.64265		-0.781394	1.10443	2.40474	2.98698
Rpl8	4.76207	3.85281	2.5189	5.17943	5.07222	4.71666	-1.27817	2.97147
Gltscr1l	4.71021	0.967922	-0.172748	0.383373	-4.92507	-2.16884	4.07197	2.96465
Smarcc1	6.12083	4.33495	4.19356	4.61922	0.811728	2.0512	2.38906	2.88167
Rpl17	7.27447	6.0321	5.78563	7.82467	7.08414	7.04328	-0.953294	2.79392
Myo5a	2.42476	3.02026	2.78618	2.5858	2.26909	2.2783	0.366008	2.79255
Smarca4	6.01832	4.03903	4.07388	4.5467	0.537072	1.67102	2.45881	2.78516
Nifk	0.608701	-3.4006	-1.80812	1.45127	0.245736	0.232218	-2.17641	2.7136
Capza1	1.29992	-2.06037	0.256511	1.86867	2.11452	1.02473	-1.83729	2.69936
Rps26	7.22706	8.74361	7.03743	4.33404	6.73951	6.81497	1.70653	2.68289
Sipa1l2	-6.95061	-5.39665	-5.83319	-3.86697	-5.28872		-1.4823	2.64019
Eno1	-0.493249		-0.098454	-1.27514	-2.48927	-0.719418	1.19876	2.46637
Rps7	-0.260067	-0.87741	-1.20734	2.30563	-0.707308	0.460731	-1.46796	2.4283
Brd9	5.82205	0.841511	0.970589	1.80294	-4.72991	-1.09731	3.88614	2.35642
Taf1d	1.83463	-1.30521	0.980387	2.15219	1.87271	1.87368	-1.46293	2.35601
Rplp0	4.79305	1.80666	2.5364	4.24361	4.10503	4.9568	-1.38978	2.23727
Polr1b	-3.36082	-3.12857	-3.74993	-2.96208	-3.00975	-0.470006	-1.26583	2.22296
Rpl30	4.2443	3.11271		3.25887	2.39666	2.90118	0.826268	2.20004
Rpl14	4.4748	3.18882	-1.52664	4.48592	5.01803	4.5647	-2.64389	2.16865
Smarcc2	0.199952	-3.25174	-2.17267	-3.27011		-4.43359	2.11037	2.15104
Crnkl1	0.672449	-1.176		-0.439038	-5.30435	-4.10829	3.03212	2.12794
Rpl21	4.7559	3.18968	1.37001	5.94309	4.70371	3.66057	-1.66393	2.11207
Mov10	1.54672	-1.66186	-0.611282	1.31798	0.870407	1.06722	-1.32734	2.08181
Rpl6	5.72246	2.3962	3.8875	6.12286	5.01459	5.01142	-1.3809	1.99232
Fbl	5.64239	3.91931	5.09388	5.67334	5.22179	5.87409	-0.704545	1.91767
Rpl37	7.27338	1.33483	0.395321	6.92513	4.41499	6.49719	-2.9446	1.90168
Nol7	2.85899	0.689056	0.693241	3.35565		2.2168	-1.37247	1.87327
Aqr	-0.265731	-0.9548		-0.381039	-3.52078	-4.74237	2.27113	1.87266
Kif18a	-3.07392	-4.87761	-4.21769	-2.84691		-3.39816	-0.933874	1.83544
Hnrnph1;Hnrnph2		-1.89737	-0.115526		0.805459	0.0109959	-1.41468	1.81577
Wdr46	-0.440297		-0.991219	-2.18702	-2.20488	-0.575863	0.94016	1.80382
Nvl	-0.336738	-1.20018	-2.05384	-0.289754	-0.551198	-0.837169	-0.637543	1.79762
L1td1	5.29401	2.99368	2.4649	5.39645	4.76523	4.06344	-1.15751	1.78598
Rpl13a	4.77689	2.89492	2.64241	5.20915	3.79295	4.19432	-0.960732	1.7706
Rpl27a	8.04017	8.78727	8.48577	8.20717	9.14966	9.81527	-0.619634	1.76193
Tmod3	0.294617	1.86479	-1.28756	1.45127	1.41142	1.26817	-1.08634	1.74031
Rpl26	7.71119	7.70599	6.01005	8.76627	8.27684	7.06081	-0.892228	1.71061
Utp3	-0.0322973	-1.30493	-0.762775	-1.71909	-1.96577	-0.459186	0.681348	1.66303
Fbxo28	0.492972	-0.92329		-0.296603	-2.10772	-1.33017	1.02967	1.65965
Taf7	4.08241	1.6481	0.200792	2.6293	-0.379749	-3.20629	2.29601	1.63809
Taf6	5.31276	3.28916	1.47526	4.39347	0.112655	-1.2262	2.26575	1.61778
Rpl12	4.62969	0.635048	-1.93662	3.70349	3.36534	2.72752	-2.15608	1.61325
Actr3	-2.1034	-1.72989		-3.48237	-1.57523	-3.88818	1.06528	1.57541
H1f0	0.0790631	1.32257		0.768034	2.41183	1.55974	-0.879055	1.57538
Zfp292	-2.29228	-3.76264	-4.17997	-2.37295	-6.0134	-6.133	1.42815	1.50227
Gtf2h4	1.21164		-0.150061	0.340965	-3.55061	-0.481477	1.76117	1.49749
Ruvbl1	6.0586	4.07229	3.24589	5.01449	2.57754	1.74637	1.34613	1.4946
Ssr3	4.39468		2.81203	2.88262		2.33093	0.99658	1.4884
Ubtf	5.20651	3.84034	1.76732	5.79047	5.30809	3.51371	-1.26603	1.48723
Lbr	2.65725	-0.101182	-0.467133	0.840001	-1.21502	-1.30438	1.25611	1.48322
Ddx41	-0.150612	-2.96414	-4.15361	-0.714678		-0.832386	-1.64925	1.47083
Rundc3a		-0.179699	-0.826335		-0.761081	-1.10275	0.428896	1.46744
Rpl4	5.72567	4.05339	4.21422	5.05208	5.30073	5.2896	-0.549708	1.45291
Hist1h1b	8.02147	9.28469	8.06449	8.5399	9.26023	8.98632	-0.471936	1.4467
Larp7	0.883666	-2.27701		-0.509351	-3.32501	-4.01377	1.91938	1.44056
Fau	10.2251	10.7265	8.89917	7.61962	10.3716	8.93882	0.973592	1.43638
Rps24	6.75939	6.62273	5.93864	8.2543	6.52914	6.46541	-0.642695	1.42989
Rps23	8.21921	7.911	7.25722	8.40092	7.66587	8.48039	-0.386584	1.42927
Ngdn	4.75429	4.84632	4.74904	5.38336	4.79641	4.77595	-0.202022	1.42244
Rps8	6.62949	7.56783	7.48884	6.4451	8.7775	9.13054	-0.888998	1.40914
Znf518b	-5.13177	-5.39867	-4.73513	-4.92795	-5.73143	-5.51896	0.304262	1.39855
N4bp3	-1.2066	-1.74953	-1.78156	-1.81121	-1.32307	-6.24293	1.54651	1.38828
Snw1	0.698695	0.288981	-0.524777	0.00761081	-0.077456	-0.71913	0.417292	1.3836
Rps9	4.88496	3.56775	2.42417	5.41365	4.18353	3.78942	-0.836573	1.36872
Knop1	6.25264	5.69265	4.57217	5.59018	4.86106	4.24102	0.608401	1.36429
Rnf214	-1.46681		-2.98155	-3.395		-2.81665	0.881647	1.35695
Pdcd11	-0.905121	-3.11588	-3.3316	-0.211866	-2.79468	-1.27848	-1.02253	1.33393
Rcl1	0.640974	-1.83124	-2.91257	0.679199	-1.39673	0.0690273	-1.15144	1.3281
Rps27a	6.04018	7.81796	3.99795	4.84392	4.93241	4.99816	1.0272	1.30394
Kif23	1.20336	0.044715	0.226505	2.02602	0.290622	0.88185	-0.574637	1.28999
Taf1	3.72547	0.49999	-1.8648	3.6012	-4.28957	-6.49997	3.183	1.28422
Pinx1	0.245276	-0.976711	-1.15737	-0.772006	1.09018	-0.27266	-0.644775	1.26871
Hspa9	3.04741	-0.389173		2.31902	-1.99351	-3.56224	2.40803	1.23898
Taf8	4.79767	1.41371	0.642294	4.14003	-1.25137	-2.37834	2.11445	1.23485
Atad5	2.67005	1.56842	0.50559	2.60858	-0.316035	-0.863816	1.10511	1.23385
Rplp1	6.93583	2.8204	1.8086	5.24225	4.49774	6.18815	-1.45443	1.23145
Rbm28	-0.89217	-4.88627		-0.667027	-0.378351	-2.74368	-1.6262	1.22942
Rpl7a	5.57934	4.49083	3.17424	5.94329	4.45727	5.01268	-0.722943	1.22615
Sec62	1.59086	1.05898	1.57025	1.4085	-3.4663	1.80685	1.49035	1.21361
Foxk1	-1.70455		-1.59984	-2.16245		-1.65081	0.254436	1.20879
Gprin3		0.18728	-0.367372		-0.0369513	0.97577	-0.559455	1.20173
Ruvbl2	5.44082	3.41186	2.41321	4.84409	1.52946	1.01999	1.29078	1.19696
Ddx21	4.31544	0.979131	-1.55495	4.17344	2.33961	1.96871	-1.58071	1.19508
Nhp2l1	5.27356	5.36803	4.26534	4.42246	4.94502	4.54536	0.331362	1.18569
Actr8	1.90819	0.377891	-3.3589	1.01223	-3.08777	-5.12381	2.04217	1.18224
Fxr2	-0.102599		-4.74671	0.398731		-0.742641	-2.2527	1.16621
Rpl10	7.80833	5.71255	4.1259	8.29367	6.78227	5.82331	-1.08416	1.16255
Ipo7	0.497128	-0.433166	0.540667	1.52216	0.171452	0.268243	-0.452409	1.15777
Nsun5	0.199699	-4.20988	-5.28702	-0.306861	-1.76684	-2.68388	-1.5132	1.14735
Taf4b	2.52745	1.307	-1.32845	2.17984	-1.14115	-3.46676	1.64469	1.13295
Chchd3	3.35711	1.59004	1.34306	3.79436	3.32767	1.46103	-0.764281	1.09543
Nol9	3.64996	1.32408	1.92801	3.17447	-3.3214	2.0112	1.67926	1.08258
Hspa8	7.62602	4.27664	4.45919	6.45139	2.88584	3.30491	1.2399	1.08172
Xab2	0.0358235	-0.78426		0.866846	-3.3059	-3.00842	1.44161	1.07954
Taf10	5.27869	3.15873	1.90792	4.82545	1.43106	-0.0507052	1.37984	1.07786
Rpl29	8.72217	8.15032	8.90024	7.956	9.78949	9.44441	-0.472387	1.06058
Smarca5	4.19466	2.3335	2.86112	4.42108	0.0335393	1.67559	1.08636	1.06043
Tbc1d32		-3.72483	-3.97708		-3.34695	-3.86336	-0.2458	1.0515
Taf5	5.55998	3.02992	1.32254	5.02436	0.756574	-0.638463	1.58999	1.02496
Top1	4.26585	2.59438	0.263109	6.42335	1.46249	3.38558	-1.3827	1.0088
Gtpbp4	4.63125	2.2815	2.8124	4.21141	-0.0587801	2.42419	1.04944	0.990917
Npm1	4.98113	-1.03054	0.291205	5.43464	1.40861	2.21924	-1.6069	0.98409
Urb1	0.601876	-6.87438	-4.73811	0.745845		-3.23298	-2.42664	0.979588
Rps11	7.10247	6.76053	3.8263	8.03406	6.26261	6.01759	-0.87499	0.964655
Hist1h1e	7.00141	7.75937	7.65575	7.46154	7.82018	7.68949	-0.184891	0.956398
Rpl38	8.36919	9.18128	8.60327	8.79094	8.62248	9.51547	-0.25838	0.948507
Pcbp1;Pcbp3		-4.24929	0.670684		-0.45396	0.81211	-1.96838	0.944901
Abcf1	3.13295	-0.0321141	1.32287	3.00246	-4.03212	0.715531	1.57928	0.931993
Eif4a3	4.38219	-1.75485	-1.19983	3.4932	1.41675	0.931264	-1.47123	0.931561
Rpl28	6.66737	4.33573	5.54671	6.65291	5.09731	6.54155	-0.580652	0.923945
L3mbtl2	-0.523304	-3.94497	-1.77638	-0.937649	-4.51515	-3.87319	1.02711	0.922028
Rps5	7.24938	-2.82949	1.59202	7.32238		2.60457	-2.9595	0.922024
Svil		-3.58733	-3.12509	-5.08188	-3.64131	-3.04765	0.567405	0.919741
Mtor	-0.580033	1.89319		0.141512	2.13819	2.50313	-0.937697	0.917932
Ercc3	1.39769		-1.36134	1.74815	-4.90943	-2.5565	1.9241	0.91567
H3f3a;Hist1h3b;Hist1h3a;H3f3c		6.16402	4.89271		5.09648	5.00162	0.479313	0.914507
Ktn1	5.42491	4.59014	4.16307	5.93684	3.12175	3.00845	0.703697	0.913603
Mtx2	3.1241	0.955227		2.12083	1.80825	-1.0628	1.08424	0.911789
Ino80	1.8964	0.309596	-1.98273	1.6	-1.95784	-3.13076	1.23729	0.908736
Rps6	8.05253	8.28954	9.02191	8.47461	8.42123	9.27601	-0.269293	0.890151
Dhx15	1.1595	-1.54693	-3.16394	2.21579	-1.29719	-1.06335	-1.13554	0.889414
Rbbp4	4.28857	0.641934	1.14066	3.30294	-0.783375	0.179529	1.12402	0.888385
Gpatch4	3.47872	3.106	2.56778	3.49215	1.97995	2.65764	0.34092	0.885736
Tet1	0.788079	1.14528	-0.400897	1.22982	-0.205744	-1.16983	0.559405	0.884776
Nsa2	1.02692	-1.84332	-0.322958	0.446994	-0.144794	0.248602	-0.563387	0.882613
Pgam5	2.10563		-0.181391	2.09178	-2.25063	-0.761542	1.26891	0.882229
Rpl24	7.4325	8.57829	8.0976	7.06501	9.46598	9.2334	-0.551999	0.878216
Hist1h1d	8.25062	8.96511	8.97649	8.73812	9.12168	8.85714	-0.174906	0.872974
Ubn2	3.46909	-1.30822	-0.341955	3.27073	-6.8355	-1.07442	2.1527	0.872208
Nop56	7.16052	6.34501	6.33814	6.31134	5.87416	6.87709	0.260358	0.864624
Hprt1		5.37495	8.06364		7.27029	1.84622	2.16104	0.864224
Prpf19	3.78111	3.17432	1.33597	3.08437	1.1691	2.23809	0.599948	0.862154
Senp3	4.1665	0.435881	0.585988	3.00728	-0.535754	-0.607934	1.10826	0.858945
Slc25a3	5.08462	-6.00743	0.839666	5.14825		0.78315	-2.99341	0.858237
Eif2s3y	-1.49315	-5.17353	-2.51298	-1.67928		-2.50672	-0.966886	0.856066
Eftud2	4.03801	3.15704	2.41789	4.36877	1.48916	1.7596	0.665137	0.852435
Rpl23	6.97835	8.94289	8.76911	9.80617	7.91536	8.58869	-0.539956	0.852176
Brix1	4.22047	0.788095	0.233892	3.15027	-1.02109	-0.362779	1.15869	0.851311
Frg1	1.91147	-1.506	1.90015	2.17956	0.288172	2.38332	-0.848479	0.849668
Fn1	-1.96675	-4.52531	-4.63232	-2.42979	-6.4314	-5.08609	0.940967	0.848921
Mtdh	7.53589	3.5328	2.24385	6.63117	0.356817	1.50297	1.60719	0.84791
Chd4	2.95635	-2.05856	-1.645	3.20694	-6.06331	-4.10739	2.07219	0.841558
Ssb	0.0203699	-2.76453	-5.1273	-0.438571	-1.76656	-2.61382	-1.01751	0.828091
Yme1l1	4.20756	-2.49436	-1.55948	2.43182	-5.39935	-2.71403	1.94509	0.822232
Rpl3	8.29661	6.77051	5.48455	6.98572	5.95968	5.96746	0.546268	0.813703
Tcp1	1.34768		-2.41954	1.10992	-3.9496	-3.6065	1.6128	0.812355
Rpl22l1	5.26446	5.93757	4.9101	5.38936	4.73297	5.31266	0.225713	0.809734
Gnl3l	3.93749	3.05722	3.08372	4.10053	2.11374	2.65353	0.40354	0.801195
Cep57		-2.96687	-1.86463	-2.07998	-1.98248	-2.36485	-0.273316	0.796484
Slc7a6	1.07413	2.3271	5.69339	4.01996	2.75773	5.09788	-0.926983	0.789012
Upf1	2.81818	-1.34946	0.160728	3.4009	0.0523223	1.01769	-0.947157	0.787004
Dnttip2	-0.510041	-3.44333	-3.54513	0.152873	-1.50839	-3.52522	-0.872589	0.782467
Gigyf2	2.06073	-3.22523	-1.46911	2.35878	-4.03728	-6.39119	1.81203	0.777475
Rpl31	4.30151	2.44609		4.4085	2.85232	-1.52805	1.46288	0.774269
Rrp1b	4.22566	3.48292	2.73366	4.50697	2.29202	2.0718	0.523818	0.767694
Taf3	3.43592	0.986074	-2.61011	3.37598	-2.68366	-3.90659	1.67538	0.763981
Ddx18	2.34249	0.540644	-0.582299	2.26564	-3.15697	0.0517801	1.04679	0.761094
Eef1d	3.04254	0.688169	-1.15488	3.53447	-2.51502	-2.57309	1.37649	0.757819
Dpp6	-0.854175	-4.34851	0.16205	0.465532		-1.57053	-1.12771	0.741256
Ddx47	6.38819	4.91976	2.90472	5.54612	4.36534	1.70289	0.866106	0.738509
Atp5c1	4.1397	3.63095	2.71678	4.58054	3.50073	3.37019	-0.321341	0.735561
Rpl19	8.81877	10.0743	8.46933	8.71194	9.19439	10.8155	-0.453162	0.732249
Rps27	8.08819	7.57192	6.51128	8.79488	6.3825	8.45138	-0.48579	0.707833
Surf6	4.75572	2.61774	2.47914	4.59243	1.66934	1.5634	0.675813	0.704543
Rfc2	4.49534	2.07167	2.49315	4.21181	1.50345	1.41717	0.642577	0.698967
Orc1	2.24904	2.44517	0.99053	5.00064	2.2819	0.610799	-0.736197	0.697791
Ppp1cc	-0.683098		-0.528595	0.641611		-0.930084	-0.46161	0.694354
Nop58	6.96704	5.56811	5.47117	6.17108	5.03018	5.86126	0.314598	0.683056
Pkp1	-1.66748	-3.65737	-5.11349	-3.57281	-3.24443	-5.57886	0.652587	0.676513
Ddx10	-1.18102	0.251475	-0.461297	-0.919932	-0.646304	-0.49789	0.224427	0.665367
Lmnb1	4.31605		-1.94186	3.51767	-5.14453	-1.1935	2.12721	0.665275
Dhx9	1.51336	-6.91511	-4.67647	1.79417	-3.5979	-3.47422	-1.60009	0.663674
Tmpo	3.95487	-5.21664	-1.43412	3.40141		-1.14692	-2.02587	0.658463
Serbp1	0.0159718	-2.63367	-2.48218	-0.268067	-4.91278	-2.38135	0.820775	0.658021
Tubb5;Tubb2b;Tubb2a;Tubb4b;Tubb3		1.90419	2.27798		2.37176	1.04111	0.384652	0.657971
Polr1c	1.7713	-3.28778	-0.297866	1.72792		-0.722012	-1.10774	0.655122
Skt	-3.32242	-6.56932	-5.9262	-1.78315	-4.87409	-6.54094	-0.873253	0.651334
Igf2bp1	4.42609	-2.29674	-3.15429	3.72348	-1.26667	0.761494	-1.41441	0.643656
Rpl15	2.26176		-3.14348	2.25722	-1.6808	2.15721	-1.35207	0.640915
Ctnna1	2.87359	1.77927	1.07192	4.16495	1.6205	1.47137	-0.510677	0.637936
Nop2	1.28827	-2.7732	-3.49502	-0.668865	-0.687757	-1.37165	-0.75056	0.633731
Skp1	-0.441283	-1.31905		-0.479281		-2.42405	0.571498	0.630908
Nol10	3.65156	3.26371	1.29501	4.63912	2.90391	2.19717	-0.50997	0.630126
Nol8	1.46087	-5.56535	-0.889517	2.01138	-2.97275	-0.303013	-1.24321	0.627456
Daxx	3.3151	1.58455	2.29085	4.147		1.75969	-0.556509	0.625861
Znf512	-1.3103	-2.89421		-2.09705	-3.30059	-2.08966	0.393517	0.618884
Lyar	7.7608	7.99188	4.7309	6.51811	6.84927	5.46462	0.550528	0.6176
Dkc1	4.18724	5.19214	3.61338	1.8977	4.6783	4.87215	0.514875	0.611985
Hnrnpc	3.96707	1.30509	0.18438	3.55116	2.71498	1.11632	-0.641972	0.611498
Timm50	4.27275		-0.986667	4.80895	-2.43973	-3.09745	1.88578	0.61084
Smim4	1.38551	-0.517395	0.376481	1.51658	-1.50655	-0.257632	0.497401	0.60836
Pwp1	0.894774	-0.773715	-1.34869	-1.4724	1.06464	0.669192	-0.496353	0.606165
Rpl10l	0.556546	1.75382	-2.62434	1.53369	-0.42079	0.61364	-0.680171	0.604622
Neurl4	-2.94017	-2.88758	-2.30204	-2.60892	-3.50404	-2.54574	0.176303	0.600879
Pkp4		-5.46684	-5.43788		-4.96418	-6.96351	0.511478	0.599851
Atxn10	0.289814	-6.46552	-2.19604	0.325546		-3.1432	-1.38176	0.595889
Ddx1	2.1132	-6.24907	-2.60217	2.24491	-3.25494	-1.60718	-1.37361	0.594333
Noc4l	1.58151	-0.962856	-1.172	0.502255	-1.3953	-1.16335	0.501014	0.592067
Rpl23a	9.79559	10.5384	9.93861	9.97574	10.7562	10.0178	-0.15905	0.588941
Racgap1	2.06704	-0.842138	-0.424303	1.28724	-2.61812	0.0985115	0.677656	0.580502
Hsp90aa1	1.41631	-2.53222	1.31465	2.18098	-3.39768	-1.47102	0.962154	0.579784
Nom1	2.40209	2.03683	1.71458	2.98904	1.48412	0.719962	0.320128	0.57943
Ddx3x;D1Pas1;Ddx3y		-1.527	-1.05439		-2.12249	-1.04249	0.291793	0.578597
Sf3b1	3.16965	-3.48809	-1.83017	3.85595	-1.82952	-0.537237	-1.21261	0.578297
Rbm34	2.57413	0.0756255	-0.393379	0.228792	1.77547	1.6949	-0.480928	0.5767
Myh10	4.12618	6.14939	5.60673	5.07205	6.28376	5.48878	-0.320763	0.575287
Sart1	2.74497	0.0788766	0.706576	3.17136	-1.2382	-0.587028	0.728096	0.575054
Atad3	5.22436	2.64689	3.24991	4.5596	2.31417	2.83208	0.47177	0.574483
Snrnp200	3.43691	2.07568	1.24469	4.10869	0.193645	0.544696	0.636745	0.569664
No66	0.531462	-3.61999		4.57487	-3.34181		-2.16079	0.563773
Ubn1	-0.623673	-6.28975	-6.2171	-0.793866		-5.25836	-1.35073	0.562601
Abcf2	5.38723	1.91961	2.47374	4.69323	0.564019	2.36222	0.720374	0.562055
Rps12	6.40108		2.08221	5.74982		-1.18439	1.95893	0.558848
Pes1	3.78717	1.52427	0.85626	2.33458	0.414242	1.99374	0.475046	0.558669
Rpl9	2.12151	-0.30017	-0.681808	2.95143	0.121152	-0.164686	-0.589454	0.556921
Gar1	1.86638	2.38721	0.885578	0.343354	3.35891	2.80055	-0.454551	0.555298
Isy1	0.53059	-2.67533	-2.41616	0.898493	-0.726365	-2.77839	-0.651546	0.551298
Hnrnpa3	4.12312	-3.23839	-0.327428	4.27943		-0.884169	-1.51186	0.548131
Kpna2	4.52392	-0.530031	1.24479	3.69302	-1.28711	0.0817255	0.917019	0.546913
Lima1	0.967257	1.94206	0.304225	1.65498	1.04583	1.18009	-0.222452	0.545031
Wdr43	2.51094	-4.36262	-1.1375	-0.557129	-4.92488	-0.702717	1.06518	0.543845
Asph	4.30335	1.09753	1.04796	4.71289	-0.37516	-0.542153	0.884423	0.543705
Rfc5	3.96503		0.807498	4.68003	-0.682448	-0.173798	1.11167	0.542148
Ythdf2	3.50644		-2.09632	3.28525	-3.28292	-2.3842	1.49902	0.541194
Myh9	5.20671	7.15552	6.0318	6.17929	7.01973	6.0308	-0.278602	0.541071
Myh14	-0.34434	2.31796	0.198262	-2.1187	2.33062	-0.0110994	0.657022	0.539778
Pnpla6	1.2664	0.245822	-0.264728	2.21505	-0.992166	-1.62164	0.548749	0.539443
Rfc4	5.0955	2.87139	3.24342	5.49719	2.01479	1.93724	0.587024	0.538726
Myef2	3.55803	-5.01095	-3.34635	2.1106		-2.02251	-1.6438	0.538423
Prdx2	0.851429	-3.78729	-3.52404	-0.868186	-3.9904	-3.96325	0.78731	0.538113
Sgpl1	3.73887	-0.546844	1.00014	3.70188	-2.56245	0.241223	0.937172	0.530324
Fmr1	0.0899521		-4.96126	0.0126961		-2.34036	-1.27182	0.529427
Kpna1;Kpna6		-1.74289	0.619517		-3.25004	0.217453	0.954606	0.5276
Cdc5l	3.47924	1.78372	0.76527	3.26405	0.957049	0.295123	0.504001	0.523472
Nsd1	-0.578586	-4.72956		0.0348559	-5.00334	-7.02284	1.34304	0.523058
Arglu1	1.00296	0.675698	2.58936	1.64965	-2.10974	2.73442	0.664563	0.522735
Rpl35a	3.75896	1.89298	0.724547	2.34387	3.28962	1.95735	-0.404781	0.52002
Rpl7l1	0.331807	-1.37324	-2.50534	0.614385	-1.04252	-1.76238	-0.452085	0.5186
Riok1	4.5196	1.131	3.33334	3.8723	-0.149386	3.26551	0.665173	0.517616
Hira	2.70451	0.606469	0.961169	3.84578	-2.3715	0.424311	0.791183	0.514324
Actn1	-1.11647	-5.01123	-2.93883	-0.970128	-5.01149	-5.2888	0.734634	0.508508
Ranbp2	0.678783	-9.15763	-6.57801	0.862655		-6.90697	-1.9968	0.506032
Rest	-1.12325		-3.75432	-1.55963	-5.30159		0.991824	0.500545
Ltv1	3.38461	0.371995	2.40072	3.05833	-0.337027	1.82317	0.537614	0.500418
Polr1e	1.1483	-1.03194	-0.16793	4.07618	-1.39372	-0.548917	-0.728369	0.496914
Myo1b	-0.543907	-0.330579	0.61696	-0.296089	-0.886493	0.323748	0.200436	0.496849
Prpf6	4.53879	2.07367	1.84433	4.75553	1.10675	0.763092	0.610473	0.48951
Gnl2	1.77887	1.42661	-2.07346	3.41807	1.20595	-1.3129	-0.726367	0.488172
Rps14	7.92258	7.45937	7.21606	8.33352	6.46217	7.12547	0.225618	0.47458
Ssr1	5.49491	-1.28136	1.20811	5.4714	-2.51274	-1.18327	1.21542	0.47295
Pabpc1	5.56111	0.544911	1.89427	4.78083	1.96584	3.20189	-0.649427	0.468403
Hnrnpk	4.98274	-3.03359	-1.84003	4.29368		-1.26553	-1.4777	0.462954
Utp6	-1.35517		-3.23127	-2.85369		-2.49892	0.383087	0.459909
Rsbn1	-1.71516	-1.83968	-2.09042	0.0639532	-3.04702	-4.05674	0.464847	0.458382
Lrrc1;Scrib		-3.81689	-4.10833		-2.93215	-4.39671	-0.29818	0.457522
Bcas2	0.812541	1.60217	-1.08423	0.910987	1.92772	-0.366345	-0.380627	0.449612
Sptbn1	0.93128	-1.38523	-1.08932	1.60357	-0.623293	-1.2794	-0.414713	0.446947
Ect2	0.286285	-4.0158		1.62416		-2.9108	-1.22144	0.44685
Tbl3	-0.0405389	-3.75355	-3.81724	0.19873	-4.12058	-1.77022	-0.639753	0.443346
Rps13	6.55857	2.9024	2.95436	5.75772	4.0954	4.01438	-0.484057	0.442992
Zdbf2	-0.629315	-5.36147	-5.87934	0.23347		-5.87135	-1.13777	0.433029
Ap3d1	0.677346	-1.69322	-0.423346	1.16783		-1.21743	-0.454943	0.432892
Eif2b4	4.78323	-4.16766	0.903346	4.17984		-0.441028	-1.3631	0.432109
Rfc3	4.04414	1.89972	2.89159	4.6298	1.06184	1.82507	0.439581	0.429185
U2surp	2.68066		-2.92727	4.03067		-1.35188	-1.4627	0.428895
Hspa5	5.68112	3.05507	1.24068	5.00409	2.22986	0.884805	0.61937	0.426597
Polr1a	-1.55503	-3.00669	-0.931965	-2.3332	-4.03741	-0.399373	0.425431	0.425894
Fam179a		-1.79535	-4.2088		-2.13856	-2.92136	-0.47212	0.423698
Eif2s3x	3.35193	-2.54517	1.1021	2.32168	-3.86561	0.813968	0.879606	0.422737
Ncl	3.47145	-2.07195	-0.594176	3.37163	-1.52809	1.21668	-0.751633	0.419393
Ddx49	3.02935	1.37668	-0.288996	2.83338	0.762289	-0.989322	0.503562	0.419063
Rbm39	3.29097	3.22687	3.81222	3.51279	3.29252	3.32142	0.067773	0.416673
Hist1h2bp;Hist1h2bb;Hist1h2bf;Hist1h2bk;Hist3h2ba;Hist3h2bb;Hist1h2ba		6.83101	5.49848		6.05562	6.84012	-0.283123	0.416326
Kiaa0020	0.919299	-2.72285		-0.574917	-1.83951	-1.82493	0.511346	0.415986
Tjp2	1.36357	-2.34265	-2.79839	2.09778	-1.66048	-2.26812	-0.64888	0.41579
Pno1	1.51362	-2.5045	0.399616	2.00801	-0.663229	-0.431169	-0.501629	0.414491
Fus	4.33788	-2.44302	-1.6665	4.76851	-2.00891		-1.30368	0.413495
Spice1	0.607161		-1.79786	0.731161	-3.19352	-1.1077	0.594671	0.411484
Aff4	0.649794	-4.03898	-3.85067	-0.782895		-5.93846	0.947391	0.407608
Ddx24	1.03071	2.43226	0.460075	1.64352	1.48415	0.0109959	0.261462	0.404958
Samm50	2.65191	-0.0793492	-0.02194	2.40307	1.16088	-2.81401	0.600226	0.401205
Luc7l2	-2.43329	-1.04707	-1.58934	-2.14895	-0.728144		-0.251347	0.401028
Rps25	8.01212	5.61361	7.21993	7.91986	4.45479	7.2144	0.418875	0.399206
Rps2	5.67047	2.62355	2.58962	5.82071	2.37296	4.061	-0.457015	0.387101
Npm3	-0.159506	1.1696		-2.38911		1.87209	0.763557	0.38672
Rpl11	6.06628	2.72235	3.08822	6.69731	2.70865	3.98084	-0.503317	0.383843
Wdr3	-0.0161254	-4.82647	-2.72424	0.174807	-3.97281	-2.0179	-0.583645	0.383524
Eef1g	1.79932	-1.69637	-2.57564	1.69728	-2.9745	-3.17525	0.659927	0.38324
H2afv;H2afz	3.84391	4.20847	3.58703	5.2879	3.8834	1.36086	0.369087	0.383021
Gtf2h1	1.4819	-5.47058	-1.1115	0.200339	-5.68982	-2.13708	0.842129	0.382825
Yy1	1.13898	-0.128886	-3.51196	-0.0695307	-2.94528		0.673452	0.380395
Matr3	3.50253	-0.321889	-0.489929	3.55655	0.201145	0.525728	-0.530903	0.379809
Ccm2l		-3.53503	-2.19299		-3.41069	-1.54521	-0.386058	0.379215
Ttf1	-1.04221	-1.19421	-1.35689	0.449917	-2.3903	-2.57853	0.308535	0.378021
Rps20	4.51177	2.28551	2.86098	5.67199	1.43833	3.85893	-0.436995	0.377236
Prmt5	4.66932	1.72614	2.61895	3.9247	1.18853	2.79871	0.367491	0.375577
Aurkaip1	-0.310836	4.56953	0.45499		3.45005	1.06234	-0.684971	0.375485
Eif2s1	3.17357		-0.0582562	2.4104		-0.806002	0.755457	0.373579
Mprip	1.77343	0.855599	0.436654	2.07593	0.618852	0.921756	-0.183619	0.372068
Taf1c	3.2718	2.93687	2.38441	4.71645	2.41973	2.23326	-0.258791	0.371044
Lyz1	2.31668	0.0404135	1.72027	-2.19579		7.18309	-1.13453	0.370417
Ctnnd1	0.0146786	0.52588	0.863477	1.46783	0.541669	-1.41857	0.271035	0.367891
Rps27l	5.94037	5.22157	4.46419	7.0383	4.07986	5.38399	-0.292012	0.36715
Uqcrc2	5.82623	-5.19258	-3.03243	4.8684		-3.16858	-1.6495	0.367143
Caprin1	4.33296	-3.00033	-2.45417	4.70781	-1.64024	-1.31827	-0.956949	0.367042
Ssbp1	1.73271	0.528359	-1.74017	0.419111	-0.952202		0.440178	0.367031
Taf1a	3.5288	2.33421	1.86407	3.3355	2.06856	1.68015	0.214286	0.365968
Incenp	-1.2281	-3.04039	-3.84341	-1.52989	-4.22355	-3.36983	0.337121	0.365311
Nufip2	3.89919	-2.54969	-3.06039	4.50013	-1.62303	-1.84082	-0.915722	0.3597
Mmtag2	0.388176	-4.2189	-2.20532	1.75772	-5.12671	-0.489763	-0.725762	0.358948
Glyr1	1.03804	0.474039	-0.803382	0.958005	0.378834	-1.42748	0.266446	0.354241
Stoml2	5.12729	-5.91007	-3.88399	5.44508	-1.26277	-4.8277	-1.34046	0.354192
Cables2	-2.97539	-5.74899	-3.12451	-4.15451		-2.99809	-0.37333	0.352845
Rps17	7.10529	4.90478	2.97382	7.16306	3.26403	2.96827	0.529512	0.351759
Krt76	3.67219	5.4056	5.33965	4.29218	5.85572	4.90968	-0.213375	0.35162
Rbm25	2.2446	-0.970537	0.0190786	3.03347	-0.753552	0.310905	-0.432559	0.351267
Ndufa4	4.21878	0.0566505	0.383961	3.48818	-0.861025	0.400173	0.544022	0.350518
Edc4	1.56	-3.54201		2.01869	-2.24559	-5.87422	1.0427	0.348287
Rps15	6.25372	2.57868	0.0625304	6.07315	2.80366	1.92225	-0.634711	0.345581
Mrpl33	-1.17041	0.933055		-0.356622	-0.528204		0.323733	0.343736
Eif5b	3.27315	-0.676518	0.747741	3.53666	-2.93749	0.872933	0.624092	0.337857
Ddx27	3.68614	3.628	2.10099	4.18038	2.94577	1.5077	0.260426	0.33381
Rps4x	7.39631	5.37841	5.68321	7.61285	5.26664	6.34469	-0.255413	0.329228
Mybbp1a	8.75066	6.10285	7.96481	9.59019	4.47509	7.36887	0.461389	0.32782
Plrg1	0.603406	-1.35019	-4.76212	-0.978254	-2.2932	-3.6782	0.480249	0.326534
Ddx52	1.61295	-0.948719	-0.873087	2.39504	-0.60636	-0.898606	-0.366309	0.323343
Dnaja1	5.56852	-1.21064	-0.0119352	4.40095	-1.8207	-0.519705	0.761802	0.321171
Ccdc14	-2.56259	-3.85392	-3.41984	-2.27044	-3.67534	-3.42467	-0.155296	0.320851
Las1l	3.41297	1.95786	2.82396	4.47079	0.770955	2.02716	0.308629	0.314281
Def6	-0.033263	-3.09937	-2.28794	-0.743366	-2.9235	-2.66285	0.303049	0.313761
D2Wsu81e	2.1824	-2.48365	-0.732396	1.11163		-0.781896	-0.509417	0.312359
Cherp	2.26398	-4.04028		3.12267		-2.52788	-1.18554	0.311629
Rbm17	1.92019	-2.32357		2.02741	-2.10964	-2.45384	0.64367	0.305678
Taf1b	2.71192	1.12466	2.09037	2.81678	0.525916	1.95757	0.208893	0.304506
Fam111a	1.3239	-3.21478	-0.406966	1.00342	-4.11033	-0.731128	0.5134	0.303745
Rpl35	10.0345	10.7364	8.64346	8.67946	10.0117	10.1341	0.196372	0.301092
Fkbp8	3.50956		-0.725216	3.01735		-2.0086	0.887801	0.299818
Rpl37a	6.70542	8.00298	4.64067	7.79327	6.9561	5.50041	-0.300235	0.299262
Polr2a	1.48951	-3.25733	-1.82836	2.51705	-5.43419	-2.7403	0.687086	0.29799
Prc1	4.13143	-1.44302	-1.45786	3.56014	-3.89375	-0.579909	0.714689	0.296511
Mki67	1.75934	-0.425373	-0.363957	2.29097	-0.0677658	-0.417439	-0.278585	0.295624
Hist2h2ac;Hist2h2aa1	2.41445	8.48351	8.32456	1.11754	7.91892	7.91927	0.755596	0.295414
Sptan1	1.11292	-0.865774	-0.869451	1.91967	-0.837645	-0.855037	-0.283097	0.294848
Tex10	6.27688	-1.42641	0.543747	6.8235	-3.89775	-0.449441	0.972636	0.293347
Plec	-4.39456	-8.12405		-2.25849	-7.34466	-7.23242	-0.647451	0.290604
Nop14	1.96967	0.289098	0.947015	2.52344	-0.229045	1.60788	-0.232165	0.289618
Mphosph10	0.875641	-1.78638	0.518172	0.711705	-0.656193	0.230828	-0.226301	0.288347
Myo10	-0.178418	-1.43467	-0.216138	-0.0422737	-2.42761	-0.010835	0.217164	0.284039
Hnrnpm	5.46557	0.932456	1.0749	4.51259	0.723798	0.86372	0.457607	0.2778
Nop16	4.03258	1.13576	0.213244	4.41832	2.09876	0.0701939	-0.401899	0.277405
Ybx1	3.87434	0.462469	0.04416	2.53088	1.2578	1.49276	-0.300154	0.27686
Wdr77	2.8516	0.58895	4.23983	3.03058	1.60776	3.92661	-0.294854	0.274956
Akap8	1.71439	-4.50027		1.58407		-2.51831	-0.925822	0.274339
Thrap3	-4.07841	-1.3537	-4.20711	-4.13999	-0.061502	-4.27632	-0.387135	0.272786
Rrp12	5.13233	0.704398	1.39286	5.69703	-0.845764	0.723585	0.55158	0.269138
Rpl22	5.73424	10.298	6.66293	6.27193	8.94299	8.59602	-0.371908	0.268383
Trim28	3.68776	-1.9164	-3.38295	3.68869	-2.09934	-1.28891	-0.637342	0.265525
Rps10	3.95518	0.881003	0.956764	3.75099	1.63207	1.26393	-0.284677	0.261449
Calm1;Calml3	0.353472		1.52743	2.38017		0.107089	-0.303178	0.260649
Poldip3	3.55531	1.85927	1.72036	3.4818	1.70187	1.3621	0.196386	0.260289
Pelp1	3.68956	0.760859	1.7909	4.46165	-0.457224	1.11752	0.373123	0.259134
Hnrnpu	5.16441	0.492797	-1.37793	5.19759	0.0621379	-3.01641	0.678654	0.257188
Ctnnb1	2.10883	0.246183	-0.10206	3.03121	0.264267	-0.234094	-0.269477	0.257119
Myl6	6.79128	7.68243	6.13766	5.63258	7.80044	6.6759	0.167481	0.254342
Rpl32	6.77453	4.02462	4.20062	6.32212	3.76396	5.67829	-0.25487	0.253497
Prpf3	2.9274	-4.27604	-4.37695	2.90021	-3.95352	-2.60098	-0.690431	0.252002
Actr2	-2.31114	-1.93816		-2.56975	-1.39795		-0.1408	0.251264
Llph	4.97668	2.75839	1.16435	4.72839	1.18391	1.99367	0.331152	0.251078
Ap2a1;Ap2a2		-3.40301	-4.40983		-4.29651	-3.17346	-0.171436	0.249318
Aatf	6.16626	4.03136	4.00948	5.52612	4.38539	3.74583	0.183258	0.241229
Prpf8	3.44611	1.67711	1.44826	4.39312	0.726492	0.585109	0.288919	0.2408
Hist1h4a	8.7667	9.11787	7.69031	8.83689	8.79828	7.57263	0.122362	0.238398
Ddx5	5.92635	1.76721	1.42541	5.68817	2.59187	1.97184	-0.37764	0.237801
Cwf19l2	1.66814	1.42833	0.837842	2.68224	0.428576	1.25247	-0.14299	0.236561
Gapdh	3.21871	-0.709791	-1.47391	3.26978	-2.32925	-1.27763	0.457367	0.236366
Snrnp40	2.72453	-1.45072	0.491484	2.59902	-1.33586	-0.530401	0.344179	0.235184
Trmt10c	2.11214	2.56437	-0.0896408	1.78883	1.99607	0.197586	0.201459	0.234835
Rbm14	3.90381	-0.428062	0.673084	3.41782	0.567858	1.11052	-0.315789	0.23438
Atp5b	8.02277		-0.899371	6.31999		-1.75745	1.28043	0.2324
Rps18	8.06911	6.96133	6.01975	9.16546	5.77121	6.81282	-0.233098	0.232347
Ddx17	3.29107	-3.17551	-1.28384	3.0684	-1.0168	-1.75912	-0.486922	0.232161
Hist1h1a	7.17823	10.311	9.47062	7.62312	10.4511	9.63771	-0.250696	0.231444
Nsf	2.96447		-1.83162	1.08959		-1.06933	0.556296	0.23096
Twistnb	5.14825	0.0626156	-3.7866	5.30113	-1.7922	-4.37575	0.763697	0.228365
Utp15	0.94505	-6.451	-3.34144	-0.538271	-6.04834	-0.604384	-0.552131	0.227491
Wdr18	3.28688		-1.24599	3.05214		-2.50422	0.746485	0.227103
Phb2	5.62347		1.48642	5.71458		-0.081032	0.738169	0.226096
Dnaja2	3.95088	-1.72033	-0.440535	3.6061	-2.77715	-0.522968	0.494681	0.22605
Rrp1	-0.845319	-4.30923	-3.07385	-2.20984	-4.38857	-2.34502	0.238345	0.223791
Rsl1d1	4.54305	3.13216	2.0973	4.14101	3.31723	2.7785	-0.154745	0.220709
Jarid2	1.11806	-2.58248	-3.34144	1.73052	-2.34742	-3.0395	-0.383154	0.218708
Banf1	3.44074	1.00432		3.24906		0.450443	0.372781	0.218708
Akap9	-2.5054	-7.31843	-4.72081	-2.1318	-6.82484	-4.48926	-0.366243	0.218315
Rrbp1	2.96155	1.04987	0.103858	3.63542	1.32468	-0.0721487	-0.257559	0.217651
Top2a	2.98763	-0.780204	0.985029	2.90479	-1.61226	0.94718	0.317585	0.215887
Znf281	2.02007	-0.672299	-1.22642	2.18119	-1.50135	-1.42983	0.290447	0.213004
Actn4	1.3492	-0.392546	-1.77673	1.51434	-0.542896	-1.14434	-0.215724	0.205498
Tcof1	6.70373	5.82963	3.36371	6.89554	5.42466	4.24912	-0.224082	0.205186
Odf2	-0.138305	-4.45535	-3.89298	1.14586	-3.74272	-4.68681	-0.400989	0.204666
Actbl2		-0.0440733	-0.944368		-0.67495	-0.113302	-0.100094	0.204615
Gnl3	6.13949	5.85256	6.21496	5.25938	5.97319	6.7431	0.0771148	0.200762
Ebna1bp2	4.98297	3.505	3.16506	4.55469	4.24395	3.21486	-0.120151	0.200727
Rrp9	-0.569182	-2.98854	-2.01471	-2.23095	-2.06362	-0.856355	-0.140504	0.195761
Esf1	2.11477	0.0360293	-0.667732	1.993	-0.713716	-0.400296	0.201358	0.193663
Rtcb	2.9701	-5.60084	-4.43332	1.82944	-5.03172	-2.17357	-0.562736	0.193617
Ckap4	4.3926	-5.23262		4.2134		-2.92598	-1.06372	0.191904
Anxa2	1.52577	-2.45571	0.142558	0.297774	-0.436292	-0.0580605	-0.196932	0.190685
Nop9	5.18305		-2.95914	4.19605		-3.96626	0.997062	0.186722
Cdh1	2.81306	-0.454844	0.0428247	3.59249	0.176353	-0.583442	-0.261453	0.182936
Hist1h1t	-0.00948289		-0.437288	0.549838	-0.746192	-0.75789	0.0946959	0.182472
Aifm1	3.59863	-2.18406	-2.42977	3.15989	-1.88136	-3.63751	0.447928	0.181048
Ogt	1.55383	-3.51121	-3.72114	1.96584	-3.68529	-5.28164	0.440852	0.180695
Pcm1	3.35214	-0.300698	1.10568	3.83354	-0.409935	1.50184	-0.256106	0.180617
Tamm41	2.28494		0.502787	2.72729		0.532858	-0.236209	0.180087
Immt	5.53602	3.56907	3.11835	5.55285	3.995	2.09245	0.194379	0.178579
Nap1l1;Nap1l4		-1.99651	-2.88102		-1.55275	-3.03957	-0.142604	0.177535
Chchd6	2.24005		-0.955692	2.4805	0.044079	-1.50032	0.300758	0.17624
Ewsr1	1.23887	-3.18127	-2.33626	1.74661	-3.54872	-3.4843	0.335919	0.173188
Epb41l5	0.591552	-0.574244	0.138674	0.711013	-0.539209	-0.245349	0.0765089	0.172229
Exoc2	0.169219		-3.07879	0.0378569		-3.72069	0.386628	0.167166
Rpl7	4.82046		2.49225	4.48669	2.40605	4.64239	-0.188689	0.165664
Atp5a1	8.76019	-2.43079	0.878277	6.20468	-1.03354	0.303697	0.577607	0.164821
Acta1;Actc1;Actg2;Acta2		3.6359	3.08516		4.91334	2.22811	-0.210197	0.164582
Rps19	3.68068	-0.525498	-1.58105	3.37289		-1.51491	-0.404282	0.163478
Sf3b3	2.59619	-1.96313	-0.590334	3.21083	-1.88851	-0.41495	-0.288214	0.161748
Sf3b4	-0.157938	-2.71865		0.478684	-2.74138		-0.306947	0.159926
Tjp1	-1.07014	-1.16476	-0.583368	-0.44004	-0.855457	-1.38484	-0.0459772	0.159871
Tufm	1.96899	-1.98277	-3.94321	1.48394	-2.30628	-4.14562	0.336989	0.159704
Nfrkb	2.08044	0.0750151	-6.46159	2.32998	-4.03401		-0.583364	0.15913
Mllt4	1.96124	-4.49095	-2.37227	2.24859	-5.11456	-3.25811	0.407362	0.159086
Cds2	2.66864		-2.09909	2.85713		-3.46257	0.587499	0.15904
Herc2	-1.74147	-4.55803	-3.24401	-1.04146	-6.35764	-2.8717	0.24243	0.156775
Prpf4	1.54016	-5.7877		0.671692		-3.67824	-0.620499	0.155908
Ctcf	-2.59409	0.164444	-4.16874	-2.72237	-2.13758		0.23051	0.155688
Hist1h1c	6.35888	10.7732	9.84761	6.86981	10.5775	10.2631	-0.24357	0.15439
Bop1	2.47643	-2.49263	-2.06787	3.13592	-3.24741	-0.981244	-0.330444	0.153015
Esco2	-2.6984	-1.61418		-2.74043	-1.17973	-2.88086	0.11072	0.151812
Snrpd3	2.62497		0.354125	2.23752		0.322257	0.20966	0.150908
Utp20	5.30268	1.0451	3.51623	6.17518	0.0122261	2.81429	0.287438	0.150566
Ankrd11	2.36864	-4.72693	-2.5151	2.43169	-5.50342	-3.05252	0.416956	0.150469
Myl12b		6.7893	4.88948		7.16341	4.92492	-0.204773	0.149054
Wdr12	1.08934	-1.55396	-0.179197	0.985125	-1.65201	0.457762	-0.144898	0.148121
Puf60	0.829122	-4.90825	-0.525217	0.596405		-2.97361	-0.346177	0.147912
Tbrg1	2.99062	1.88832	1.44302	3.31902	1.28578	1.40313	0.104678	0.147745
Kif22	-1.80569	-6.56701	-5.05553	-2.08488		-6.23608	-0.315592	0.14712
Exoc4	1.16674	-3.71288	-0.995583	1.56431	-4.10372	-1.84207	0.279919	0.146304
Ahctf1	2.37519	-2.15274	-3.50303	2.53211	-2.49783	-2.37696	-0.312636	0.14586
Usp36	-2.52755	-5.55719		-2.71734		-4.86052	-0.253441	0.14582
Abt1	1.75354	-1.6332	-2.20337	2.4352	-0.972641	-2.79214	-0.251153	0.144647
Hjurp	1.84545	-2.6938	-2.58892	1.5108	-2.88931	-2.85574	0.265658	0.143951
Cdk5rap2	-0.416131	-4.44736	-1.97658	0.249423	-4.65348	-1.73845	-0.232524	0.142746
Dsp	1.73198	-2.79694	-3.38486	-0.0858219	-0.595645	-3.08011	-0.229413	0.139383
Raly	2.20015		-2.24558	2.1176	-0.887487	-0.525484	-0.257589	0.138661
Cpsf1	0.300506	-4.55858	-3.57028	0.413244	-4.61814	-2.86145	-0.254002	0.137378
Rfc1	4.0134	1.30506	1.80972	5.10691	0.964702	1.61284	-0.18542	0.136874
Slu7	0.0965549		-3.75598	-0.429656		-3.88995	0.330091	0.135719
Noc3l	0.370104	2.26587	2.55855	0.881621	1.88214	2.74398	-0.104406	0.135349
Zc3h18	1.98308	-4.42424	-4.53316	2.36696	-6.21499	-1.95134	-0.39165	0.134807
Gtf2h2	0.714845	-3.13465	-2.03402	0.471013	-3.22376	-1.14641	-0.184888	0.133314
Tceb3	1.09513	-2.94464	-3.52504	2.10569	-4.44139	-3.91005	0.290399	0.128275
Erh	1.64302	2.55747		1.97633	4.40915	0.445742	-0.176828	0.127847
Anln	2.10984	-3.53669		1.46123	-3.80371		0.457816	0.125903
Mllt10	0.683192	-2.8949	-5.02828	1.19948		-5.28846	-0.368838	0.125854
Blm	-0.659546	-4.88283	-5.32274	0.367124	-5.41863	-5.01651	-0.2657	0.125534
Ftsj3	4.76821	3.98374	3.74348	4.83721	3.59613	3.90278	0.053101	0.123344
Nrde2	1.96317	-2.89293	-4.21022	1.97426	-3.44081	-4.57761	0.301391	0.123026
Hnrnpf	6.84558	0.550679	3.36297	6.32344	1.98682	3.17513	-0.242056	0.121994
Nol6	3.32344	-2.53976	-0.87206	3.1925	-3.33141	-0.777742	0.276092	0.120511
Parp1	7.51791	6.00465	4.41675	8.16095	5.15085	5.05705	-0.143179	0.118675
Far1	2.85752	-3.58175	-3.3401	2.50092	-3.95067	-3.54908	0.311502	0.118093
Ptbp1	3.26695		-1.28943	2.97845		-1.72461	0.361838	0.117018
Abce1	3.81842	-3.17403	-3.00963	3.746	-3.86471	-3.28769	0.347052	0.116041
Gpatch1	-3.68691	-1.55905	-7.32223	-1.8816	-2.56654	-7.37702	-0.247681	0.11533
Otud4	1.32351	-3.95624	-2.61317	1.67501	-3.49857	-4.15136	0.243006	0.11222
Flna	0.79046	-3.70596	-3.98473	0.961297	-3.86762	-4.69109	0.232396	0.111153
Rps16	7.04004	4.98136	4.01334	6.85761	3.07194	5.68125	0.141312	0.11078
Ikbkap	1.75691	-2.68174	-2.40222	2.54866	-3.64669	-2.93578	0.235588	0.108819
Actb	7.8286	1.36377		8.13272	2.0563	2.58818	0.337119	0.106413
Rbbp6	0.871281	0.580326	-1.14729	0.800966	-0.0688125	-0.642689	0.0716168	0.105979
Rif1	6.78264	-1.27822	1.16667	7.37016	-2.00118	0.258748	0.347786	0.105362
Rps15a	7.76459	4.17915	2.81044	7.87031	3.44703	4.00903	-0.190733	0.105306
Eif3d	0.449018	-4.17487	-3.20358	-0.0673878	-3.85557	-3.48019	0.157906	0.0951364
Hnrnpd	2.314		-0.812663	1.85947		-0.700631	0.171251	0.0889972
Rpl36a	8.35891	8.98893	4.93756	7.69511	7.70544	7.18681	-0.100654	0.088273
Actg1	0.244868	9.07187	8.76619	-0.525066	9.26448	8.35745	0.328687	0.0859528
Arid5b	-3.5189	-5.32095	-4.9693	-2.79994	-5.7662	-5.49589	0.0842945	0.0856222
Sall4	4.68107	-3.13886	-1.35402	5.19497	-2.35648	-1.87345	-0.258951	0.0847717
Atxn2l	3.47046		-3.66867	4.03953		-3.41563	-0.411055	0.0834907
Hspd1	3.19994	-3.58904	0.41793	1.03404		-0.614836	-0.199993	0.0833018
Rpl39	5.66566	8.693	7.70297	5.36913	8.51735	7.88133	0.097939	0.0831064
Fam208a	1.54456		-5.77618	1.56039		-6.64719	0.42759	0.0814606
Nat10	6.47331	5.8857	4.75723	6.99345	5.15284	4.78338	0.0621864	0.0814275
FAM120A	-1.21287		-5.73656	-1.05629		-5.43473	-0.229214	0.0761608
Tbl2	2.45412		-3.121	2.02027		-3.23059	0.271725	0.0741724
Cenpe	1.79451	-7.36362	-4.67634	2.12445	-7.3785	-5.7859	0.264837	0.0733612
Znf106	1.98882	1.37208	0.250568	2.18769	1.01959	0.544056	-0.0466247	0.0733033
Hells	3.27425	-2.16811	-1.00282	4.40839	-3.635	-1.24321	0.191051	0.0729755
Eif2s2	4.23211		0.765779	3.41777		1.29776	0.141181	0.0726027
Mga	-1.19964		-5.33866	-0.881323		-6.11007	0.226548	0.0709487
Tomm22	8.07496		-1.02422	7.04866		0.753597	-0.375759	0.0709249
Slc7a5	1.67157	-2.9501	-2.76184	2.0995	-3.47217	-3.11497	0.149087	0.0702686
Ddx56	2.85759	-2.65696	-1.91046	2.3503	-2.93233	-1.57295	0.148381	0.070132
Dimt1	1.27912	-3.16971		2.00495	-2.30271	-3.00217	0.154681	0.0641072
Hltf	2.39207	-3.54126	-4.46787	3.13264	-4.33676	-3.85747	-0.185154	0.0633169
Leng8	0.00395252	-4.72109		0.835317	-5.09527		-0.228595	0.0627992
Slc25a5;Slc25a4		1.50176	3.55876		1.39746	3.49571	0.0836765	0.0592551
Ankrd17	1.84126		-4.9114	1.83525		-4.38796	-0.258713	0.0586101
Rpl27	6.39456	6.62012	4.41553	6.76271	4.21567	6.28669	0.0550471	0.0578585
Tpm3	1.36846	2.2679	1.26426	0.880953	2.71217	1.20736	0.0333746	0.056827
Pcnt	2.42629	-1.7163	0.536807	2.86421	-1.61419	0.265772	-0.0896651	0.0559739
Utp14a	1.4642	-0.48443	-1.0175	2.23119	-0.874055	-1.1969	-0.0659842	0.054766
Polr2b	1.58692	-6.08967	-3.38913	1.86887	-5.17234	-4.12808	-0.153443	0.0538191
Myo1c	0.992903	-0.448297	-4.47374	1.64926	-0.0598202	-5.15535	-0.121075	0.0509094
Rps3a	8.24855	3.03699	3.5617	8.1499	2.52794	4.48676	-0.105786	0.0498189
Cd3eap	2.14922	-1.40621	-0.183531	1.8977	-2.45131	1.34074	-0.0758839	0.0485571
Riok2	2.48216		-2.78193	2.07166		-2.70293	0.165752	0.048361
Ddx54	-0.801039	-3.97837	-4.9936	-0.824365	-4.20176	-4.98054	0.0778869	0.0477143
Pak1ip1	-0.643009	-5.38248	-4.04959	-0.711207	-5.4946	-3.61773	-0.0838478	0.0465036
Trip12	2.66341	-3.65494	-5.86971	3.10085	-4.17281	-6.26166	0.157464	0.0452981
Myh4;Myh8;Myh1		-4.533	-3.9205		-7.21146	-0.968126	-0.136953	0.0452217
Kpnb1	5.22579	-2.38219	-6.66249	4.49992	-4.71957	-4.15941	0.186724	0.0447709
Rps3	6.0091	3.19328	4.40045	6.73377	3.23529	3.7995	-0.0552427	0.0447224
Lrrc59	7.61062		0.996443	8.14077		0.0170003	0.224648	0.044409
Ice1	-1.89343	-6.71155	-5.88529	-2.29416	-7.19539	-4.76438	-0.0787799	0.0421167
Myl1;Myl3	0.501187	3.03114		0.540862	2.85582		0.0678227	0.040911
Bbx	-0.402629	-2.7355	-1.80753	0.766905	-1.93107	-3.62067	-0.0536099	0.0406582
Jup	3.05054	0.274403	-0.588877	2.69385	1.59175	-1.37135	-0.0593949	0.0397992
Spata5	1.99818	-4.76668	-3.15538	2.74264	-4.93548	-3.40065	-0.110126	0.0388371
Hsp90ab1	4.02347	-0.127949	2.0366	4.05864	0.264907	1.4571	0.05049	0.0336829
Ddx51	2.35286		-2.38013	1.05006		-1.24583	0.0842481	0.033043
Ddx20	4.97067	-4.47396	-3.7111	5.18262	-4.66541	-3.34012	-0.130488	0.0330222
Tpx2	0.880908	-5.08814	-4.86236	1.28391	-5.1261	-5.47305	0.0818829	0.0304553
Rps29	7.35086	7.19517	4.23964	7.55209	5.67768	5.45542	0.0334964	0.0302385
Chchd2	2.31089	-1.96358	-0.871594	1.81587		-2.04387	-0.0607631	0.0296838
Ttc3	-1.08414		-5.20771	-0.234542		-5.86238	-0.0974598	0.0287803
Fip1l1	1.9023	-3.45089	-1.66492	0.894658	-3.50317	-0.760702	0.0519045	0.0279312
Coil	2.24741	-0.892984	-3.00545	0.473321	-0.0206574	-1.97739	-0.0420998	0.0270506
Dnajb6	3.66931	-0.623154	0.425502	3.02236	-0.0716341	0.403373	0.0391854	0.0265616
Rpl36	5.1209		1.91307	4.46767	4.01395	2.17939	-0.0366857	0.0262011
Hnrnpa2b1	3.73528	-3.58287	-0.00670264	4.03061	-3.00321	-0.674716	-0.0689929	0.0254669
Nhp2	3.13475	3.39014	0.769193	-1.89481	4.4673	4.58209	0.0464997	0.0220703
Hmmr	0.857453	-4.81265	-3.10732	1.33418	-4.99171	-3.25318	-0.0506034	0.021838
Nacc1;Nacc2		-1.00425	-3.20213		-3.52705	-0.60217	-0.0385795	0.0216739
Sfpq	3.91582	-2.72611	-2.60592	4.53166	-2.68568	-3.08307	-0.0597038	0.0196645
Prpf40a	1.68495	-1.19393	-0.605997	2.25335	-2.26628	-0.184922	0.0276232	0.0191158
H2afy	-0.809074	-3.97758	-3.15234	-1.46436	-3.21525	-3.31751	0.019377	0.0187817
Chtop	0.755473		-2.36388	1.5639	-2.59864	-1.2782	-0.0332213	0.018032
Ahdc1	-0.141265	-2.54655	-3.23093	-0.0179133	-2.70633	-3.13783	-0.0188934	0.0151893
Rai14	1.84025	1.88065	0.72183	2.29308	1.00605	1.16509	-0.00716167	0.0140234
Larp1	0.890733		-4.15669	-0.130294		-3.20285	0.0335899	0.0116444
Kif20b	1.97158	0.967338	0.0713861	2.68588	0.623644	-0.27675	-0.00748879	0.0078542
Melk	0.858789	-4.20803	-1.66503	0.705437	-3.34586	-2.41511	0.0137558	0.00782208
Sdad1	5.60667	0.157093	1.72093	6.09114	-0.467699	1.83008	0.0103944	0.00448199
Cep131	1.11426	-3.28325	-1.04279	1.3531	-3.14191	-1.40045	-0.00750766	0.00446257
Sgol2	2.2947	0.920915	0.819562	2.7794	0.561368	0.704304	-0.00329828	0.00415467
Tardbp	5.62788	-0.517088	-0.411637	5.15993	-0.465258	-0.0210029	0.00849348	0.00338575
Cdca2	-1.22148	-3.36453	-3.51901	-0.0398672	-5.21685	-2.85256	0.00141809	0.000919121

## Sheet: H2AK5ac
Protein IDs	H2AK5ac_R1	H2AK5ac_R2	H2AK5ac_R3	H2Aunmod_R1	H2Aunmod_R2	H2Aunmod_R3	log2 fold change	p-value
ARGL1	2.28008	1.94875	2.39152	4.51798	4.59661	4.61865	-2.37097	13.9235
UTP20	1.69033	1.63949	1.50141	2.87357	3.62156	3.18368	-1.61586	8.99159
RS19	-3.42409		-3.23251	-1.34167	-1.17211		-2.07141	8.04281
U5S1	-3.66097	-4.77878	-4.50915	-2.39027	-2.08448	-1.77145	-2.23423	7.88476
TCOF	3.29692	2.56681	2.6325	5.47733	4.66709	4.59798	-2.08206	7.72599
RLA2	4.76134	5.36616	4.63632	3.48785	3.74764	3.10806	1.47343	7.10729
PININ	-1.22191	-2.63187	-1.37148	-3.62791	-3.93381	-3.83611	2.05752	6.54147
PARP1	-2.53738	-1.78877	-2.59259	-1.24319	-0.654143	-0.725927	-1.43182	6.52034
CR021	-2.50529	-2.81232	-2.57936	-0.19282	-0.130598	-1.52006	-2.01783	6.37677
ATAD5	0.94246	-0.0511489	0.0752876	1.8586	1.88113	1.51284	-1.42866	6.27583
NOM1	1.28825	0.620183	1.15823	2.02838	2.14255	1.77726	-0.960509	6.13684
RBBP6	-3.81453		-5.07054	-0.276589	-1.63237	-0.744522	-3.55804	6.11711
PAPD5	0.451802	1.29318	0.345434	-2.29687	-0.681756	-2.32251	2.46385	5.92293
DHB12	-3.01026	-1.8665	-2.39532	-1.04727	-0.632172	-1.23778	-1.45162	5.78815
MYO1C	-3.843	-4.79027	-4.5485	-3.25287	-2.90118	-3.37393	-1.21792	5.75345
SUN1	-4.40268	-4.45057	-3.94566	-3.35818	-3.26286	-3.72978	-0.816033	5.7066
TRIM6	-4.09965	-2.04586	-4.55797	-0.713472	-0.293775	-0.814469	-2.96059	5.6525
SR1IP		-3.18714	-2.66434	0.231376	-0.203075	-1.1588	-2.5489	5.62029
SGPL1	-3.67865	-1.27615	-2.73207	1.35112	0.423381	-0.250436	-3.07031	5.53406
RFC1	0.418125	-0.243629	0.123735	1.38689	1.09306	0.716995	-0.96624	5.38851
NPM	4.293	4.54695	4.60502	4.01015	3.33616	3.77392	0.774911	5.36834
NDUA4	1.49628	1.70166	1.87715	2.21483	2.05417	2.42194	-0.53862	5.35107
TOP1	-0.212861	-1.94256	-0.929431	0.988897	0.98992	0.427183	-1.83029	5.2189
NUCL	3.82767	3.05501	2.94148	2.35799	2.08676	1.47259	1.30227	5.20542
BAZ2A	-2.20823	-3.97469	-2.87352	-0.767824	-1.08114	-1.52645	-1.89368	5.17051
KIF23	-1.95542	-2.40677	-2.98191	-1.35036	-0.662456	-1.43798	-1.29777	5.15522
KTN1	-0.066711	-2.1438	-1.25336	0.85689	0.899406	0.846641	-2.02227	5.14293
RFC2	-0.267605	1.08895	0.580582	2.00775	2.75237	1.68586	-1.68135	5.09047
TYY1	-3.8432	-3.09769		-2.14835	-1.21914	-1.14789	-1.96532	5.08994
RS6	5.19136	5.9882	6.02262	6.57593	6.97281	6.60881	-0.985122	5.04252
PRP6	-2.94157	-5.43474	-5.50561	-1.66433	-1.79974	-2.04624	-2.79054	5.03647
BRD7	-2.56913	-2.03682	-2.83504	-4.09761	-3.57375		1.35535	4.92678
ZFP14	-3.90452		-3.85689	-2.75639	-1.39711	-1.84374	-1.88162	4.80784
CLK3		-4.27446	-3.89172	-3.36022	-2.66504	-2.66663	-1.18579	4.74645
BAZ1A	-1.8172	-2.45952	-2.37785	-1.7092	-1.14193	-0.843386	-0.986683	4.70499
RFC4	0.669151	1.77219	1.34119	3.38314	2.63784	2.14997	-1.46281	4.70238
SMCA5	1.16412	0.586853	0.626378	1.85922	1.99019	1.2372	-0.903088	4.69387
H2AV	-0.00257985	-0.721317	0.366672	0.972431	3.46857	2.34013	-2.37945	4.66724
ZN292	-1.11557	-3.39332	-2.73088	-0.340979	-0.245785	-0.543955	-2.03635	4.62499
RL35A	4.75831	5.8455	5.32887	4.12666	3.51445	4.49695	1.26487	4.61172
TEX10	-2.56469	-5.18337	-3.48568	-0.856691	-1.18102	-1.90132	-2.43157	4.56179
RFC3	0.306773	1.39192	1.69486	2.50885	2.16425	2.59732	-1.29229	4.54053
HP1B3	0.0588557	0.876041	-0.216645	-2.1572	-0.577724	-2.72877	2.06065	4.43516
MMTA2		-4.18808	-3.85236	-2.35007	-1.35205	-2.83432	-1.8414	4.33123
REST	-1.34795	-3.20244	-3.27755	-0.896729	-0.945145	-0.693995	-1.76402	4.31953
PPIB		-4.7406	-4.03759	-2.75069	-2.92013		-1.55369	4.31845
ZCHC7	-0.935482	0.0803573	-0.998097	-1.95266	-1.55581	-3.07906	1.57811	4.27667
RL12	3.47772	3.75692	3.69982	2.38553	3.27374	1.9058	1.12313	4.27032
PRD12	-3.99625		-2.55258	-1.72234	-1.13672	-0.63259	-2.11053	4.26333
HMGA1	-3.84044		-4.10261	0.130601		-1.46679	-3.30343	4.18141
RRP12	2.96122	2.2078	2.46759	3.02771	3.77656	3.3152	-0.827623	4.15696
RL26	5.60285	5.54296	5.48281	6.91997	7.51808	5.91219	-1.24054	4.11861
MUM1		-4.7636	-4.4015	-5.49445	-5.29994		0.814646	4.10413
HELLS	-3.47524	-4.51973	-4.09911	-3.42628	-1.84062	-2.4992	-1.44266	4.08549
HYDIN	-5.40809	-3.9789	-4.51922	-6.65594	-6.0272		1.70617	4.0094
RL8	5.87321	5.77136	5.36478	4.74597	5.34539	4.28513	0.877619	3.9834
EED		0.398806	-0.748763	-1.68206	-1.44131	-1.24561	1.28135	3.88116
AKAP9	-3.98618	-4.56125			-5.7297	-6.61688	1.89957	3.84742
H11	7.5106	8.75717	7.81554	10.0327	9.77745	8.57265	-1.43317	3.82034
SMCE1	-2.55815	-2.10514	-2.4456	-3.12069	-4.40896	-3.00933	1.14336	3.80585
ZN182	-2.92033	-4.44221	-1.98339	-1.87462	-0.987358	-0.682544	-1.9338	3.77294
H10	3.68989	3.59114	3.72161	4.50811	4.51039	3.7763	-0.597391	3.77151
FRG1		-3.70214	-4.35022	-1.9906	-0.498986		-2.78139	3.72027
SGO2	1.48363	0.324507	0.596286	1.93117	1.70474	1.45366	-0.895049	3.71705
TET1	3.52573	2.30538	2.69755	3.89291	3.69134	3.56702	-0.874207	3.67067
GA2L3	-1.78417	-2.3881	-2.64075	-3.51563	-2.98606	-5.07148	1.58671	3.66944
CTCF		-5.44415	-2.34084	-1.45177	0.722451	1.10355	-4.01723	3.63301
RL19	7.02092	7.14915	7.19792	7.94456	8.02034	7.20894	-0.601948	3.55893
RUVB1	-3.23527	-1.86792	-2.4088	0.131493	-1.44388	-1.58674	-1.53762	3.53516
CHD2	-1.18406	-4.71162	-3.92963	-0.676771	-1.39487	-0.0290062	-2.57489	3.52592
PELP1	-2.67427	-4.60523	-4.13362	-1.84842	-2.09887	-2.94573	-1.5067	3.51372
PHF20	-3.3369	-5.83739	-4.96354	-2.7119	-3.36228	-2.95464	-1.703	3.5125
PABP1	-1.5611	-0.536409	-2.04064		-2.66484	-4.42839	2.16723	3.49336
RFC5	-2.63515	1.19935	0.234636	2.5857	2.59906	1.57722	-2.65438	3.45053
CK098	0.245457	-0.735825	-2.62127	3.27373	0.972327	0.553477	-2.63706	3.44956
LYRIC	-3.30595	-2.48242	-2.36429	-0.848619	-1.93022	-2.11789	-1.08531	3.42623
DDX51	4.43397	4.77766	3.50942	3.1598	3.64711	2.23937	1.22492	3.41075
RBM14	2.07341	2.49856	1.33256	1.11686	1.43819	0.576937	0.924179	3.40487
SSRD		-1.87026	-2.18706		-1.14256	-1.49281	-0.710975	3.3979
RIF1	-0.412	-2.03386	-2.53944	-0.0574535	-0.200608	-0.467252	-1.41999	3.39193
RL31	2.73024	2.46854	2.56641	2.05836	1.56205	-0.0691459	1.40464	3.38453
RPF2	3.66082	4.24181	4.40223	5.05513	4.87637	4.35723	-0.661292	3.35274
PRP8	-4.37089	-6.3826		-3.8145	-2.26701	-3.2722	-2.25884	3.35015
PHF11		-2.60229	-2.10594	-4.68489		-3.58193	1.7793	3.34066
LYAR	2.51748	3.44324	2.68256	5.33303	3.58173	3.73292	-1.3348	3.30812
H1T	0.557122	-0.396258	-2.19288	1.47743	1.46072	0.489459	-1.81987	3.25747
ATPG	1.04924	2.37621	2.65778	3.14372	3.88323	2.74214	-1.22862	3.19571
NSE2		-3.94961	-3.19411		-1.7706	-2.49331	-1.43991	3.17918
RL3	3.46543	5.61426	4.63865	6.08028	5.6731	5.83993	-1.29166	3.17652
RL13	6.13183	6.39858	6.26278	6.80974	7.06945	6.31896	-0.46832	3.12091
LARP7	0.51913	1.29556	0.424847	-0.282813	0.515584	-0.711454	0.906074	3.10533
PRSR1		-3.45027	-5.40715	-1.67006	-1.79185	-3.3419	-2.16077	3.04398
GLE1	-1.69979	-0.483764	-1.47625	-3.97166	-2.08034		1.80607	3.00188
CDCA2	0.731234	-1.08371	0.045549	1.37991	1.14476	0.545662	-1.12575	2.98398
PWP2	2.70781	2.72311	2.62717	3.74485	2.7828	3.15365	-0.541067	2.97506
RL36	5.14023	5.19272	6.2716	5.09062	4.55549	3.42868	1.17659	2.97277
DDX31	-1.41697	0.445029	-0.38859	-2.38447	-0.85795	-2.32718	1.40302	2.95754
PSPC1	-0.121129	0.221592	-0.286075	1.39442	0.470401	0.17597	-0.742133	2.89491
TR150	1.1993	0.309221	0.700799	1.81827	1.52603	0.928149	-0.687707	2.89409
HNRPC	3.55563	4.05185	3.35279	3.31137	3.06563	3.32585	0.419139	2.89065
DDX50	2.35458	3.10926	2.66453	2.42904	2.2171	1.51113	0.657034	2.87185
ANR11	-5.81059	-4.2895	-4.76236	-2.76888	-3.74414	-4.54631	-1.26771	2.86879
NLE1	-0.288169	0.785882	-0.309397	-2.07402	-0.156205	-1.25937	1.22597	2.85589
OGT1	-0.0566301	-1.32482	-1.78196	0.140841	0.364058	-0.488033	-1.06009	2.84307
DIM1	-2.37789	-0.262544	-1.82224	0.60151	0.421781	-1.01507	-1.4903	2.82536
MYNN	-2.9853	-2.75983		-3.52933	-5.45332	-4.06731	1.47743	2.82119
SENP1	-3.92277	-4.33533	-4.12304	-4.4992	-4.38708		0.316096	2.82055
NAT10	4.64271	4.69551	4.49464	4.6812	5.38239	4.93879	-0.389841	2.81826
RL10	1.88523	3.45175	4.07279	4.00478	5.04206	4.30279	-1.31329	2.81302
ORC1	3.44137	2.46371	2.41642	3.72368	3.42982	3.16817	-0.666725	2.77213
UTP11	3.21529	3.69257	4.10105	4.39367	4.43962	3.86375	-0.562711	2.74428
RU2B	-2.80267	-2.73602	-2.95409	-2.14701	-2.68353		-0.415655	2.72941
SPAT5	-2.23093	-3.17115	-2.94844	-3.19752	-3.20177	-3.8699	0.639555	2.72517
TTF1	-0.836834	-2.70005	-1.89026	-0.71261	-0.673482	-1.10684	-0.978067	2.70026
TUSC3		-2.51035	-3.43215	-2.14935	-1.55526	-2.45639	-0.917584	2.69448
RS25	1.14963	2.35599	0.646047	2.96247	3.26458	1.64837	-1.24125	2.68829
RM54	-0.458102	0.130808	-0.239958	0.197955	0.351628	-0.0389198	-0.359305	2.6792
RRP1	3.03565	3.80679	2.89338	2.96169	2.40362	2.66682	0.567896	2.67305
NONO	-1.00835	-0.0842407	-0.71247	1.37695	0.00193998	-0.227321	-0.985543	2.65292
LC7L2		-1.82682	-1.32843	0.557011	-1.28257	0.116738	-1.37469	2.64333
RM11	0.371274	-0.620059	-1.8956	0.618981	1.19468		-1.62162	2.6395
ZSC10	-1.19448	-2.92156	-0.581022	-2.28867	-3.97652	-2.82249	1.46354	2.60922
SUZ12	-2.30021	-3.18067	-2.56721	-3.00023	-3.96283	-6.37175	1.76224	2.6068
RLA0	2.24901	3.59473	3.0318	2.23084	2.4943	2.06729	0.694375	2.59746
MRT4	-1.00476	0.565506	0.268458	-1.58883	-0.24302	-1.88433	1.18179	2.59382
LAS1L	0.482285	0.0223419	-0.0336951	0.384882	0.655702	0.380571	-0.316741	2.59341
HDAC1		-1.58624	-3.21623	-0.696207	-1.57354	-1.1705	-1.25449	2.58508
REPI1		-2.74943	-2.83549	-3.3336	-3.59551	-4.93234	1.16136	2.58046
NUP85	-3.85297	-5.32415		-2.65472	-3.25008	-3.9274	-1.31116	2.57075
BYST	2.51398	3.29867	2.25139	2.48177	1.69415	0.21652	1.22387	2.54717
LN28A	4.24229	4.28935	3.87961	5.03877	5.11724	4.06331	-0.602688	2.53894
RUVB2	-4.03501	-0.925728	-1.57735	-0.60657	-0.268744	-0.896182	-1.58886	2.51768
ATAD3	-0.0603859	1.03477	0.627039	1.03884	1.42016	0.898076	-0.585217	2.51331
ZFP28	-3.74818		-3.28298	-3.29698	-1.15592	-1.46471	-1.54304	2.49198
RL6	5.95317	6.232	5.52628	5.62834	5.6326	5.3636	0.362305	2.4693
SMRD1	-2.78153	-1.64562	-1.6913	-2.3318	-2.83554	-4.32587	1.12492	2.43034
WDR43	4.74452	5.29425	4.35177	4.34357	4.53699	4.03052	0.493152	2.41464
RL5	3.18318	4.10418	3.84208	5.25171	4.48103	3.77329	-0.792199	2.37046
RFOX2	-2.73966	-2.32037	-3.46041	-1.61564	-2.36019		-0.852238	2.36346
LRC59	-1.30594	-3.15185	-5.02905	-0.142114	-0.48413	-2.67285	-2.06258	2.34101
RBM34	3.74672	4.37315	3.36959	3.7599	3.04961	2.25602	0.807977	2.33803
BAZ1B	-3.24113	-4.78099	-5.16266	-2.50339	-3.43451	-3.92909	-1.10593	2.32361
MYH10	0.175644	-1.6994	-1.89767	0.392915	-0.052761	-0.515929	-1.08188	2.30314
DDX52	0.201882	1.42687	0.599045	0.0180689	0.565588	-0.564959	0.736365	2.28817
SRSF6	1.66031	2.859	2.10768	2.15485	1.13747	1.12611	0.736187	2.27745
MYH9	-1.28935	-4.53905	-3.64432	-1.0626	-0.995322	-2.51003	-1.63492	2.2703
HJURP	-1.82136	-1.09851	-2.08257	-2.67785	-1.88211	-5.35666	1.63806	2.26684
RL23A	5.99545	5.72582	5.81673	7.0023	8.21548	5.65705	-1.11228	2.25986
INCE		-5.06132	-3.876	-5.4285	-4.96766	-5.27519	0.755122	2.25017
HNRPM	0.483818	1.36098	-0.26887	0.254988	-0.367794	-0.871674	0.853468	2.24879
WDR46	4.40013	5.56062	4.22355	4.11467	4.3564	3.61053	0.700897	2.232
CENPP	-2.93514	-4.24739		-1.92901	-2.61047		-1.32152	2.21245
SRSF2	0.00268693	0.571635	1.02393	-0.607057	0.628457	-0.707858	0.761568	2.19816
TIF1B	-2.63614	-4.17894		-1.62998	-2.25335		-1.46587	2.18347
DNJC9	-1.32876	-0.501401	-1.57134	0.647917	0.543921	-1.39471	-1.06621	2.16783
LUC7L	-0.295885	1.01743	0.822782	1.57905	0.544873	1.82537	-0.801654	2.11901
RS27	1.62167	2.08804	3.3188	3.52665	2.68697	3.1989	-0.794669	2.11829
LITD1	0.373756	0.221687	0.265933	0.397912	-0.231716	-0.878885	0.524688	2.11685
RBM8A		-1.02241	-1.70977	-0.863851	-0.0355886		-0.916371	2.11577
RL22	3.79086	4.17985	1.10391	4.53291	5.29695		-1.89006	2.08062
H2B1F	7.25481	7.27192	7.06007	7.74653	8.90314	7.12457	-0.729148	2.07347
SRSF1	-0.239362	1.20177	1.33532	-0.208165	0.636291	-0.921618	0.930406	2.05474
TOP2A	-2.60561	-2.74576	-2.8696	-2.60909	-1.21518	-2.51472	-0.627324	2.05259
DHC24		-2.05634	-2.80031	-5.04092	-3.07571	-3.05026	1.29397	2.03441
ZN568	-2.74636	-2.08944	-2.7255	-2.59348	-3.2117	-2.89209	0.378654	2.01444
CI114	0.511385	1.37455	-0.56179	1.87093	1.13259	0.876827	-0.852065	1.9977
SDA1	-4.18805		-3.0669	-1.53968	-2.90385		-1.40571	1.98653
NOLC1	4.48581	3.49597	3.92805	4.1947	2.65727	2.76855	0.763102	1.98279
NOL7	4.80018	4.67204	4.55942	5.54792	5.13386	4.54512	-0.39842	1.97868
NEPRO	-0.863874	-0.118502	-0.909427	-0.698034	-1.04626	-1.82828	0.56026	1.97568
RRBP1	0.0545642	-0.544413	-0.691604	0.757296	0.298246	-0.507002	-0.576664	1.97182
ASPH	-2.32165	-5.54864	-4.16436	-1.38545	-2.31115	-3.74203	-1.53201	1.96137
CDIPT		-1.96539	-2.93567		-3.04902	-4.1774	1.16267	1.95132
ZFP39	-3.67249	-1.32204	-1.5681	-1.1101	-1.59577	-0.790685	-1.02203	1.93698
NR0B1	-4.46271	-2.8145	-5.77627	-1.93066	-2.89528	-4.09478	-1.37759	1.92143
RPN1	-2.17593	-2.06585	-1.45041	-3.11589	-1.67615	-2.81402	0.637956	1.91395
CTNA1	-5.57772	-4.49338		-4.27114	-4.13175		-0.834101	1.90746
STAU1	-1.5407	-0.344484	-1.66326	-1.19859	-1.9633	-3.94098	1.18481	1.90609
DHX33	-0.209079	0.91785	0.0174319	-3.31864	0.765522	-1.47257	1.58397	1.9037
PRC1		-1.89011	-2.40843	-3.10142	-2.29778	-4.47272	1.14137	1.89788
MK67I	3.31718	4.63326	4.36759	5.15197	4.37525	4.57366	-0.594284	1.88952
HNRPF	0.693202	2.03069	0.88351	1.11825	0.456216	0.0523389	0.660201	1.87017
ZN322	-0.926258	0.241196	-1.09753	0.136234	0.189319	-0.370193	-0.579318	1.87009
TAF1D	-2.55207	0.286475	0.924414	1.49932	0.614762	0.739783	-1.39835	1.86828
RIOX1	1.44172	2.00392	0.737154	1.17317	1.04381	-0.345743	0.770519	1.86589
ROA1	-3.41285	-4.16232		-1.94773	-3.31555		-1.15594	1.85476
REXO4	2.63349	3.6421	2.56989	2.90963	2.39711	1.53753	0.667068	1.85424
LA	2.45161	2.73777	1.48651	2.28182	1.49793	0.140264	0.918621	1.85021
ADT2	-0.608441	1.55357	1.44596	1.37601	2.51039	1.46995	-0.98842	1.83658
DDX18	3.13872	4.35819	3.44176	3.2316	3.33282	2.94399	0.476754	1.8216
AURKB		-4.22212	-4.04665	-2.26754		-3.78369	-1.10877	1.81901
RL23	3.77086	4.29063	4.42681	4.68193	4.86883	4.08283	-0.381768	1.80752
RS13	4.73242	5.18013	4.72257	4.27654	5.08507	3.30594	0.655854	1.79468
H14	5.87004	6.14206	3.99653	7.73529	6.73384	5.20111	-1.22054	1.79162
MYO5A	-1.1796	-2.37095	-3.08978	-1.32897	-1.34274	-1.8443	-0.708106	1.782
F111A	-3.30026	-2.37788	-2.85276	-2.30984	-1.53217	-2.92708	-0.587268	1.77933
PWP1	0.770175	2.02387	0.953211	0.206574	1.28456	0.40184	0.618095	1.76417
PCNT	-6.30116		-5.90656	-3.32716	-5.63875	-5.58983	-1.25195	1.74929
PUM3	3.10633	4.79298	3.87308	2.81768	3.64752	3.36067	0.648844	1.73896
RRP8	1.77352	2.81343	1.69142	2.16142	1.53062	0.278218	0.769372	1.69427
U520	-5.05469	-6.05307		-5.49023	-1.94861	-4.17659	-1.68207	1.6825
AATF	2.63466	3.2711	2.50481	2.64053	2.69225	1.29084	0.595653	1.67654
RS27A	2.8566	2.33554	3.0318	3.2324	3.67106	2.60483	-0.428115	1.66414
H32	6.72041	8.15144	7.92524	7.73424	8.89123	8.06828	-0.632221	1.62914
DNJB6	-0.0682451	-1.4462		-1.02623	-1.77567	-4.18481	1.57168	1.62873
NOP16	4.56684	3.5164	4.29051	5.73857	4.60493	4.02658	-0.665442	1.62328
ROA0	-2.88113	-4.34937	-1.49221	-1.19919	-2.86686	-1.36312	-1.09785	1.61842
ZN184		-4.60516	-3.10369	-7.16105		-4.46201	1.95711	1.58802
RL24	4.5279	4.51253	3.92377	5.96817	5.9624	3.65069	-0.872351	1.57747
MTF2	-1.49499	-0.126733	-1.33246	-1.11083	-1.26578	-3.09152	0.837983	1.56978
JARD2	2.27444	1.18683	1.57636	1.67928	1.10954	1.00806	0.413582	1.56368
CMS1	-1.79708	0.228654	-1.1519	0.595556	0.269069	-1.04674	-0.846067	1.5596
ORC4	-4.9866	-2.16309	-3.82821	-2.51408	-1.62505	-3.59484	-1.08131	1.55849
KI18A	-3.84718	-5.68714	-3.90583	-4.8135	-2.68617	-3.03728	-0.967736	1.55797
ZN512	-2.47054	-0.533227	-1.69716	-3.44913	-0.964527	-3.59288	1.10187	1.54907
MYO1B	-3.30185	-5.48913	-3.18833	-3.53407	-1.57805	-3.63618	-1.077	1.53939
RL17	3.17302	4.48251	4.30302	5.14344	5.81634	3.53841	-0.846548	1.5378
TECR	-0.121168	0.841355	1.84851	0.645877	2.61948	1.88917	-0.861942	1.52711
ICE1	-2.80006		-5.02361	-4.68373	-5.34846	-4.62211	0.972934	1.51362
UT14A	4.14241	3.56199	3.61581	3.82457	3.50956	3.10101	0.295025	1.51128
MIC60	-0.177015	-0.464843	-1.41981	-0.591549	-1.0362	-3.20163	0.922573	1.48122
ZFP62	2.25531	4.05118	3.23348	3.53459	3.88335	3.76055	-0.546176	1.47298
RS4X	0.487133	3.26243	2.35236	2.98345	4.06712	2.10277	-1.01714	1.45629
RS23	4.58867	5.71225	6.1474	5.87341	6.45879	5.70246	-0.528776	1.45458
BLM	-3.56407	-7.14738	-4.12078	-2.84133	-4.76701	-3.47927	-1.24821	1.4181
NSA2	0.269859	2.58971	1.99948	3.18476	3.25073	1.27082	-0.949086	1.41442
K22O	3.6983	3.24225	4.25827	3.69259	4.03694	4.7373	-0.422672	1.40941
MBB1A	8.96113	8.35844	8.586	8.85605	8.96258	8.66866	-0.193906	1.40503
KNOP1	2.99867	3.81755	2.98769	4.58023	3.9027	2.94696	-0.541994	1.40205
CINP		-4.62217	-2.87721	-1.02638	-3.29894		-1.58703	1.3833
NGDN	2.38822	3.13645	2.73614	3.7624	2.94503	2.69085	-0.379156	1.37794
NACC1	1.29037	2.08136	1.79932	2.51162	2.52241	1.40065	-0.421212	1.3551
ACSL3	-4.96363	-3.35707	-4.44141	-4.18663	-5.51672	-4.81505	0.585429	1.35415
MCM5		-2.44415	-2.87099	-5.14288	-2.77403		1.30089	1.34836
MOV10	-1.07487	-3.04384	-4.7884	-3.27105	-4.89547	-4.09145	1.11695	1.34351
RS3A	2.1127	2.88843	2.92056	3.68897	3.30915	2.30735	-0.461256	1.32428
H12	8.65423	7.92611	7.64328	9.30967	8.63158	7.78806	-0.5019	1.32227
ELYS	2.59239	1.39805	1.66533	2.59903	2.60721	1.7437	-0.43139	1.31155
RL35	6.8995	6.58595	6.74638	5.52941	7.50973	5.09484	0.699284	1.31052
RL36A	4.13755	4.99362	6.10466	4.63621	6.41946	6.50083	-0.773559	1.30111
IMB1	-1.1614	-3.1082	-1.37984	-0.0465109	-2.18217	-0.996696	-0.808021	1.29803
SENP3	-0.544677	0.218943	-0.167521	0.751394	0.65109	-0.56983	-0.44197	1.29362
NIP7	2.1522	3.57495	3.23525	0.569594	3.24362	2.61708	0.844038	1.29271
F207A	-3.69926	-0.554379	-0.176615	1.10477	-1.24007	-0.64556	-1.21647	1.29029
GANP	-1.71191	-2.61851	-3.53381	-2.16232	-3.37168	-5.04485	0.904871	1.2817
SC61B	-0.932753	-1.74777	0.129026	-0.181679	0.187243	-0.857602	-0.566487	1.26879
FCF1	4.107	4.04245	4.22938	5.6229	4.43685	3.78555	-0.488825	1.26179
SRSF7	3.38272	4.34553	3.75933	3.35502	4.16955	2.36475	0.532756	1.2542
RAB18		-2.58995	-3.74052	-3.04639	-0.476956		-1.40356	1.23866
ORC2	-2.02668	-2.4412	-4.43739	-1.50579	-1.95373	-3.09454	-0.783734	1.23682
HNRPU	3.87199	3.17764	2.99145	3.24216	3.21744	2.74949	0.277332	1.23595
DDX54	2.9882	1.74749	2.09639	2.63941	1.37112	1.31255	0.503	1.2288
RS14	5.88002	5.87431	4.9592	5.81058	5.19481	4.31221	0.465311	1.21458
I20L2	0.939018	2.71877	2.09579	1.55918	1.48672	1.33385	0.457943	1.20824
ACTB	4.33031	4.31108	3.12955	5.57264	3.80753	4.14064	-0.583288	1.20413
DDX21	7.29595	6.76912	6.79321	7.03434	6.83157	6.20626	0.262036	1.19947
TBP	-2.07498	0.592781	-1.63468	-0.98639	0.403726	-0.146804	-0.795803	1.19919
TRA2B	3.33705	3.35341	3.3285	3.82589	2.60488	2.47287	0.371774	1.19504
ZN106	1.18626	-0.192135	0.0122896	0.93824	1.02737	0.299108	-0.419436	1.19249
TBRG1	-2.21559	-4.19651		-1.07414	-3.27817	-2.31752	-0.982777	1.18539
RL34	4.16388	5.50018	4.82718	3.03655	5.49837	3.87917	0.692387	1.16669
NPA1P	1.01793	0.967137	0.673719	0.761401	1.48142	1.01258	-0.198872	1.15813
UTP23	-0.00317021	2.31552	2.09019	2.50684	2.84699	1.25899	-0.736759	1.15027
RS15	2.54827	3.09947	3.41058	2.65706	3.62713	3.91584	-0.380572	1.1473
U3IP2	4.44163	5.29247	4.21259	4.70162	4.35285	3.89517	0.33235	1.1331
DDX56	2.81858	3.35954	2.59636	3.31251	2.45578	1.77804	0.409388	1.12782
CH60	-4.70554	-5.89113		-3.19876	-5.24495		-1.07648	1.12433
TBB5	0.349719	-0.814298	-0.621521	0.464489	-1.35584	-2.45981	0.755019	1.11896
RS8	5.19901	6.52698	6.20713	6.49432	7.31948	5.64982	-0.510165	1.11673
NPM3		-1.32831	-3.19063	-2.39057	-2.58657	-6.18577	1.4615	1.11407
CEBPZ	2.5929	1.0917	1.26911	2.33677	1.90794	1.91431	-0.401769	1.11395
AROS	0.659349	-0.569933	-1.45384	1.76941	0.1473	-0.884942	-0.79873	1.10983
SMD3	-1.1314	-0.172737	-1.28156	-1.24957	0.69333	-0.427313	-0.534049	1.10537
AHDC1	-1.31666	-3.14559	-3.5437	-1.53065	-1.61333	-2.89245	-0.65651	1.10237
SRSF3	3.78063	3.73973	2.13645	3.2818	3.43651	-0.0545648	0.99769	1.07985
SRSF5	2.14705	4.18713	4.24365	4.49709	4.23902	3.58878	-0.582353	1.07188
ERH	3.93732	3.69356	3.46175	3.63973	3.86121	2.67223	0.306486	1.07124
SOX2	-1.63681	-1.28411	0.0721801	0.704565	-1.47362	-0.148059	-0.643874	1.06976
RRS1	4.50944	5.70177	3.81509	4.91406	4.11217	3.30209	0.565992	1.06969
BOP1	3.64106	1.84549	2.87202	3.71827	3.09435	2.89968	-0.451244	1.06798
HNRH1	-2.88812	-1.5638	-2.63971	-3.42903	-2.39911	-2.48769	0.408064	1.06184
TAP26	-0.932208	0.330067	-3.1068	0.361726	0.470879	-1.68002	-0.953844	1.06146
RL4	6.3416	7.32524	5.77574	6.61416	6.08739	5.41895	0.440691	1.05184
PESC	3.45734	4.85018	3.64471	3.58397	3.89279	3.41171	0.35459	1.05137
NU107	-4.39222	-4.08349	-3.42346	-5.6766	-4.98174	-3.12577	0.628319	1.05034
H13	9.48075	10.3681	9.80738	10.7952	10.7087	9.37175	-0.406476	1.04452
S61A1		-0.110497	0.460345	-0.116905	0.99276	0.817953	-0.389679	1.03806
RRP7A	0.0775204	1.47065	0.610818	0.877279	0.323118	-0.207593	0.388728	1.02769
TRIPC	2.66682	1.80391	1.94931	2.53304	2.48982	2.08503	-0.229283	1.02719
MSL1	-2.66111	-2.88657	-4.24431	-0.934962	-2.47466	-4.07631	-0.768687	1.00548
RS24	2.49884	3.36422	4.01227	3.53786	4.22483	3.27139	-0.386253	0.998044
RS11	4.00549	4.04891	4.14668	4.9998	5.137	3.34419	-0.426636	0.996743
THOC4	-3.46347		-2.784	-1.63996	-3.23432	-2.94216	-0.51826	0.993476
TAF1C	1.45883	-0.592891	0.395277	1.58037	0.674619	0.49355	-0.495774	0.97986
RS17	1.8434	2.86535	3.43894	2.81459	3.50837	2.93853	-0.371265	0.972992
UBN1	-6.08661		-4.06075	-3.39437		-4.81855	-0.967218	0.953174
WDR75	1.8544	2.36163	1.41481	0.987192	2.26008	1.3977	0.328623	0.948712
NOG1	4.37823	5.46204	4.3246	4.47885	4.79315	3.95191	0.313652	0.945395
H15	8.71029	8.68661	7.7469	9.62963	9.07645	7.77616	-0.446146	0.941587
RS30	6.71115	5.96961	3.65316	7.10043	5.72352	5.62186	-0.703961	0.903704
RL27A	4.83162	5.8484	4.10023	5.73364	6.16488	4.38438	-0.500882	0.903676
PP1G	-2.42429	-0.839841	-0.915889	-1.22728	-1.47573	-3.02405	0.515678	0.899184
G3P	-0.411406	-0.197608	-4.94256	1.03031	0.158026	-2.82153	-1.30613	0.896547
ZN629		-3.49796	-6.61642		-3.93102	-3.88246	-1.15045	0.8957
PDIP3		-3.30562	-4.68491	-2.02367	-4.11767		-0.924596	0.895353
RS5	3.54818	2.75714	3.26552	4.65311	4.45552	2.14456	-0.560781	0.889084
SMCA4	-1.87529	-2.52083	-2.87517	-2.22996	-2.14152	-4.64677	0.58232	0.887529
TRA2A	-2.10947	0.809673	-0.960735		-0.430602	-3.10947	1.01652	0.883167
ZFP59		-1.19391	-2.22375		-1.72934	-2.72684	0.519254	0.877976
KPYM	-2.17198	-4.72317		-3.60506	-5.6578		1.18386	0.876306
COIL	1.27422	1.37648	0.458945	1.82093	0.356466	-0.540688	0.490979	0.870656
RL28	4.92114	6.16331	6.43095	5.43688	6.93825	6.39909	-0.419604	0.868678
SRFB1	0.766297	0.901084	0.415886	1.5623	-0.332135	-0.45807	0.437058	0.864138
ODF2L	1.03963	1.02906	-0.0515648	-1.12756	2.01249	-0.974488	0.702229	0.855881
SSF1	3.37005	4.22573	3.47406	4.34302	3.22525	2.18018	0.440463	0.855817
MATR3	0.339313	-1.38903	-2.46943	-0.0478305	-0.749769	-1.03732	-0.561407	0.853292
DDX47	4.44426	5.14568	4.33945	5.04316	4.38227	3.52072	0.327746	0.851651
MYEF2	-4.66593	-0.833339	-4.08948	-3.40069	-5.22665		1.11742	0.851003
RALY	1.22931	1.92289	0.956561	0.842822	1.40713	1.21872	0.213364	0.848219
FBRL	5.74396	6.61837	6.03031	6.42036	6.3546	6.13739	-0.173239	0.842391
RLA1		4.04344	0.404664		1.0708	0.847875	1.26472	0.837684
IF6	3.7753	3.47887	3.56146	3.77617	4.62143	3.21477	-0.265581	0.836649
NUPL2	-1.85914	-0.787423	-3.66476	-1.20533	-1.58107		-0.710577	0.831545
H2A1F	7.86767	7.24247	6.68323	9.11073	8.4716	6.05351	-0.614154	0.81269
ENY2	1.67436	0.593905	-0.749309	2.16925	0.993029	0.0762766	-0.573198	0.811945
PLAK	-6.3698		-3.4398	-5.63541	-3.91603	-1.64542	-1.17251	0.808497
SAS10	4.81142	5.26996	4.28183	5.22424	4.54836	3.55271	0.345963	0.805305
NUP98	-2.9616	-3.63461	-3.62256	-4.16849	-3.47732	-3.23092	0.219319	0.802692
XRN2	-0.0579677	-1.80402	-1.65564	-0.305938	-0.897947	-1.18361	-0.376713	0.801467
LAP2B	0.964312	1.32326	0.431346	1.33706	0.710645	-0.346364	0.339192	0.799945
MIC19	0.0559732	-0.878257	-1.87895	-0.168912	-0.236873	-1.12926	-0.388731	0.796858
RL13A	1.46622	4.49969	5.20399	4.32654	4.82265	4.14654	-0.708612	0.796671
RL27	8.2054	9.39598	8.88204	8.59211	9.94665	8.91964	-0.324996	0.79642
RPF1	3.17867	4.128	3.24407	4.31498	3.51346	3.46869	-0.248798	0.790789
TPIS	-2.37141	-3.50054		-3.46637	-3.16977		0.382094	0.785997
IMP4	2.62202	4.16982	3.44758	3.43954	3.988	3.66746	-0.285198	0.785175
ILF3	-0.783923	-2.96694	-3.0878	-0.864911	-1.79076	-2.57339	-0.536532	0.781188
WDR74	0.950982	2.95303	1.97509	2.84787	2.33619	1.84324	-0.382735	0.771561
ZCHC9	-0.233976	0.240655	0.0684025	0.580939	0.284897	-0.281736	-0.169673	0.765655
PNO1	2.40308	3.0481	2.13888	2.39944	2.58961	2.06123	0.179926	0.751354
ABT1	2.35517	2.1599	1.88445	2.63992	2.48571	1.78463	-0.170246	0.745198
PRR11	-1.42889	-1.27466	-3.85894	-1.69289	-2.64664	-4.09801	0.625015	0.743594
RRP36	0.22088	-1.21467	0.961453	1.26309	0.385104	-0.329634	-0.450296	0.74164
NU214	-2.01083	-4.44984	-2.871	-2.6641	-3.82811	-4.31814	0.492887	0.737305
H2A2C	3.4438	0.312224	0.25227	1.44399	2.93397		-0.852883	0.731192
NOL6	1.05604	-0.517068	-0.22801	0.229663	0.169599	-1.23972	0.383809	0.729059
SON	-3.04973	-7.06822		-3.48966	-4.15129		-1.2385	0.725191
RT24		-3.22025	-3.60478	-3.64517	-2.39391		-0.392976	0.714998
ESCO2	-1.90795	-0.552788	-2.13591	-0.7356	-0.309638	-2.2679	-0.427836	0.714372
AIFM1	-3.53705	-2.53742	-2.89287	-2.33322	-3.01198	-3.00901	-0.204376	0.713894
KRR1	4.35939	4.5398	3.12544	4.90287	3.40457	2.3108	0.468793	0.690316
ZN296	-1.58876	-0.797244	-2.73783	-0.413947	-3.21041	-3.25226	0.584263	0.685078
HBA	4.4083	3.44877	2.01408	4.47065	3.57436	-1.17431	1.00015	0.681021
LBR	2.02427	3.7245	2.72671	2.67734	2.81391	2.13812	0.282039	0.676325
NSMA3	-4.52703	-2.0655	-2.59259	-4.86161	-2.63919		0.688693	0.67585
U2AF2	-2.89329		-3.93183	-1.98004	-3.05087	-3.89684	-0.436638	0.669185
DHX9	-2.03961	-4.95853	-2.94465	-3.44713	-1.83498		-0.673209	0.662924
TIM50	-1.72507	-0.490231	-0.412378	-0.834483	-0.876941	-1.71124	0.264993	0.661689
H4	7.65392	8.2653	7.0029	6.62769	8.56351	6.57553	0.385131	0.657111
ML12B	-0.299484	0.51285	-2.80049	0.225428	0.764056	-1.66853	-0.636024	0.654949
PISD	-2.20856	-1.33383	-1.51596	-2.25682	-0.972613	-1.07491	-0.251338	0.654015
H2AX	-2.15168	1.50621	-0.125064	1.96697	-0.0080487	-0.729789	-0.666555	0.638033
KMT2A	-5.12261	-6.24828		-4.37499	-5.72735	-5.82855	-0.375146	0.631627
NOL12	0.250704	-0.916203	-1.27762	-1.26226	0.681401	-3.12229	0.586677	0.625665
PPIA	-0.587042	-2.15576		-1.8244	-1.74945		0.415526	0.622475
DDX10	2.74384	1.98726	1.63407	2.21741	2.0477	1.53147	0.189525	0.621722
TM201	-3.30963	-4.1184	-4.80329	-4.73392	-4.33064	-3.89189	0.241714	0.618888
YBOX1	1.52721	2.85274	0.960023	2.65258	0.622343	0.81959	0.415152	0.61494
TADBP	-0.570217	0.563664	-0.836996	0.25535	-0.554005	-1.51276	0.322621	0.612392
RL7L	2.66789	3.49841	2.83707	3.69863	4.09415	2.13892	-0.309446	0.603627
SF3B1	-4.305	-3.88236	-3.69071	-5.0653	-3.47634		0.311467	0.603176
HNRPD	-2.24856	-2.33264	-3.48737	-1.89257	-2.43974	-3.00358	-0.244225	0.602697
IMA1	0.53425	0.823938	-0.000855834	0.964946	0.461884	-0.951199	0.2939	0.596469
ATPB	-4.78581	-3.6836		-2.24253	-3.62634	-5.15282	-0.560807	0.595287
DDX5	1.44001	1.78516	0.860828	2.13318	1.29784	-0.503597	0.38619	0.59186
EF1A1	1.50297	0.583907	-0.197129	1.41449	0.24481	-0.953047	0.394496	0.591383
DDX27	4.00182	1.70388	3.38406	3.81592	3.30337	2.9904	-0.339981	0.589443
NKRF	-0.938422	-2.40896	-0.479674	-2.0768	-0.955507	-1.73241	0.312552	0.588516
NOC2L	1.10625	0.323663	1.42892	0.995694	1.10619	1.21805	-0.1537	0.578597
SNF5	-3.76069	-3.24977		-2.24413	-3.03825	-4.1859	-0.349135	0.568915
MGN2		-0.582489	-1.19341	-2.18162	-0.473536		0.439625	0.565363
DDX3L	-3.37139	-1.81093	-2.86104	-3.24623	-2.48849	-2.99552	0.228956	0.562641
MRRP1		-1.11612	-2.76597	-1.32609	-0.750778	-2.52658	-0.406562	0.542943
VIME	-0.066524	-0.796133	-2.3317	0.557904	-0.785371	-5.50912	0.847411	0.540876
UIF	0.164313	-0.7943	0.481431	0.598908	0.207654	-0.35004	-0.201693	0.532822
SURF6	4.16408	4.97995	3.39847	4.78274	3.64686	3.29528	0.272542	0.530617
WDR12	1.98304	4.30813	3.14955	2.69006	3.23657	2.64472	0.289791	0.516294
ZFP1	-3.72401	-0.149212	-1.97425	-0.94487	-0.49863	-2.84545	-0.519507	0.512859
RS27L	1.35168	-0.476785		0.184879	1.71197		-0.510979	0.494669
NOL9	1.30886	2.4758	1.66796	1.85092	2.23416	1.80422	-0.145555	0.484379
RL21	4.66842	4.59581	4.59354	5.01015	5.53658	3.8801	-0.189687	0.477965
AT2A2	-3.86554		-5.85638	-5.02164	-5.04323	-3.24649	-0.423839	0.477765
RS26	3.13359	2.60605	4.50203	4.12891	4.88055	2.3301	-0.365967	0.477764
RL14	6.57274	6.24555	4.9251	6.63489	5.8207	4.31333	0.324825	0.472683
CHTOP	-0.615919	-1.48505	-0.572271	1.21276	-2.3535	-0.305774	-0.408909	0.467851
NOP9	-1.67901	1.21799	0.240341	-1.08418	0.308394	-0.513106	0.356072	0.46467
RL29	7.3474	5.47946	5.58612	7.30407	6.39294	5.59789	-0.29397	0.462569
BRX1	2.79454	3.79304	3.07843	3.48865	1.92332	3.56442	0.229875	0.461578
RBBP4	0.601689	1.59896	0.620099	1.19556	0.797524	0.377326	0.150112	0.454198
PB1	-3.1137	-5.83947	-5.57966	-4.57118	-3.78304	-5.12372	-0.351632	0.453057
ACL6A	-3.04305	-2.26561	-3.28741	-2.67018	-1.72881	-3.52809	-0.222999	0.452629
NH2L1	5.57229	6.08874	5.64042	6.1051	6.21253	4.26297	0.240284	0.4509
DX39A	-3.47417	-3.17291	-4.22657	-3.10118	-4.68537		0.26873	0.449551
NOG2	1.30461	-0.472729	0.294071	0.602994	0.208036	-0.316603	0.210507	0.444574
TAM41	-2.92602	-3.04885			-2.28934	-4.53633	0.425401	0.431033
TDIF2	4.44729	3.52369	3.22861	4.22002	3.56124	2.84587	0.190822	0.430722
RL37	2.19853	4.41909	5.52397	4.41451	3.56533	5.31394	-0.384066	0.425304
RL10A	5.36035	5.55507	5.36675	5.4494	6.15964	4.00792	0.221733	0.424654
NSD1	-1.2616	-3.82628	-2.71252	-1.10524	-2.26803	-3.38949	-0.345881	0.424353
RL38	0.475495	0.475355		-0.241505	2.19688	0.448839	-0.325979	0.413412
GRP78	0.0885272	-0.266551	-1.29367	-0.50766	-0.0207606	-1.57069	0.209137	0.41151
NOC4L	1.71234	2.93115	1.92582	2.66472	2.00551	1.36281	0.178758	0.40829
PR40A	-4.76745	-4.65604	-3.95916	-4.8443	-3.72633		-0.175575	0.392238
DDX49	2.09238	3.34161	2.55437	3.52456	2.40063	2.54961	-0.162145	0.386117
CCD86	-1.58763	0.591915	-0.86376	-0.114646	-1.80414		0.339567	0.385652
TAF1B	-0.524659	0.863523	0.0545329	-0.068519	0.942553	0.0140772	-0.164905	0.385255
PO121	-1.68273		-1.9748	-1.22763	-1.45336	-3.88397	0.359554	0.384798
EMD		-1.51548	-2.36322	-3.12263	-1.40686		0.3254	0.384199
SMRC1	-2.07205	-2.63842	-2.36119	-2.02887	-2.32741	-2.51105	-0.0681097	0.381099
TBA1B	-0.0447578	0.129843	-0.682008	1.05502	-0.216316	-2.42326	0.32921	0.379648
RLP24	4.64969	3.30516	2.57211	5.99754	3.89424	1.89043	-0.418413	0.37849
DDX55	-4.59423	-3.6131		-4.09976	-5.2835	-3.63279	0.235025	0.378484
U2AF1	-3.35405	-1.68244	-2.1949	-1.42052	-2.1186	-3.04947	-0.214266	0.377887
HSP7C	2.44493	2.3221	1.58859	2.06785	2.09918	1.93333	0.0850867	0.376776
NVL	3.71444	2.91465	2.58782	3.32169	3.29665	2.11041	0.162726	0.376132
NOP56	6.19612	7.26371	6.28424	6.93965	6.70402	5.60293	0.165826	0.372811
RBM39	1.59485	2.44188	1.60172	2.95306	1.82472	1.36634	-0.168559	0.369364
IMP3	3.57481	4.56256	4.37622	3.92665	5.00355	4.0035	-0.140039	0.365408
SMD2	1.48235	-0.502425	-1.86098	1.81528	-0.381042	-1.15099	-0.388101	0.353372
RS15A	1.04163	2.72438	1.83915	1.0687	2.9888	0.80822	0.246479	0.350556
MPP10	5.39759	3.2761	4.10604	5.15819	4.35068	3.90007	-0.209739	0.349412
GRP75	-3.62304	-5.36905	-5.72152	-3.09695	-5.91188		-0.400123	0.349042
WDR3	3.4276	2.78725	2.84729	2.95297	3.43712	2.34665	0.108468	0.345233
RRP5	3.04206	2.7626	2.57168	2.12588	3.35151	2.57267	0.10876	0.33885
PK1IP	-1.74642	0.963151	0.189342	-0.342502	-0.438702	-0.495904	0.227727	0.336778
CENPO		-4.48994	-3.28513		-3.97498	-4.16324	0.181578	0.3329
RGAP1	-2.01971	-0.58929	-1.58429	-1.58128	-0.720524	-1.47448	-0.138997	0.329499
RL30	4.70994	4.48214	5.80558	4.15919	5.39714	4.98854	0.150932	0.328488
RL39	5.46543	4.37704	2.90974	4.65624	3.83764	3.59256	0.221919	0.327329
SMBT2	-2.51414	-5.84747	-3.60219	-4.18237	-3.04742		-0.373038	0.325222
RRP1B	5.84	6.01316	5.44976	6.10264	5.98907	5.42847	-0.0724221	0.322851
MYL6	1.22588	1.28887	0.666226	1.69398	1.64447	0.256166	-0.13788	0.320699
GAR1	2.32624	2.12572	2.04964	3.16596	2.49687	1.28675	-0.149327	0.319102
RL7A	6.42028	6.84216	5.83545	6.30433	6.7542	5.70506	0.111436	0.313864
NOP10	4.53146	3.68474	2.87831	3.79144	3.57258	4.12736	-0.132289	0.311431
NOL8	2.97261	1.76182	2.03919	2.51103	2.08267	1.86432	0.105201	0.301696
GNL3	3.77569	4.49353	3.55903	4.13737	4.14076	3.2364	0.10457	0.299656
KI67	4.21256	2.35729	3.09696	3.96853	3.26428	2.90281	-0.156269	0.296143
GLYR1	3.38546	4.9294	4.00567	5.24861	4.25886	3.34324	-0.176727	0.293977
LDHA	-1.61997	-4.42599		-1.79074	-3.41628		-0.41947	0.286209
HBB1	2.81891	1.54521	0.542981	2.8209	1.24185	0.098787	0.248521	0.284837
S10A6	3.19295	-1.48217		0.241357	0.278045		0.595689	0.28162
RBP2	-1.59932	-3.47333	-2.78308	-2.16754	-2.40259	-2.86908	-0.138842	0.279319
SAMD1	-2.14157	-2.63631	-4.65019	-2.6012	-3.19537		-0.244401	0.277163
SPTC1		-4.75862	-5.14811	-3.73497	-5.67604		-0.247859	0.276386
PRDM5	-5.09941	-2.08448	-5.50466	-5.31059	-3.14925	-5.12993	0.300405	0.275394
BCLF1	0.735637	-0.777003	0.0323416	1.05059	-0.0743852	-0.535464	-0.14992	0.274104
RL18	6.27639	7.06639	6.18773	6.51774	7.27688	5.29053	0.148458	0.271218
HS90B	-0.341601	-1.71528	-2.07766	0.175297	-1.23057	-2.44377	-0.211834	0.26923
NOC3L	3.35514	2.34378	3.48236	3.1027	3.17787	3.14907	-0.0827882	0.269165
PPHLN		-2.45747	-3.31926	-1.62557	-4.029	-3.72326	0.237575	0.265535
CC137		-3.13242	-1.82462	-0.982636	-4.99014		0.507868	0.265273
NSUN5	0.438162	1.89214	0.929173	1.81795	1.06359	-0.0962391	0.158059	0.26395
IF4A1	-3.98135	0.595782	-5.82068	-2.98534	-2.05194		-0.550106	0.25299
TXTP		-3.38717	-3.29329	-4.9457	-1.54427	-2.68579	-0.281643	0.249354
ALBU	-2.27234	-4.5189		-1.48925	-4.45671		-0.422641	0.249064
RBM28	4.0626	2.11633	3.5121	3.33026	3.39312	2.56147	0.135393	0.247587
NOP2	5.69324	4.24946	4.15516	5.22931	4.48103	3.99864	0.129625	0.246579
ORC3	-2.92223	-1.31704	-1.6615	-2.92873	-1.59035	-1.77494	0.131083	0.237175
RPA43	-1.55275	-2.98866	-3.11687	-1.27516	-4.53477	-2.50511	0.21892	0.23701
NOP58	4.72643	6.24166	5.39596	5.92832	5.79423	4.95785	-0.105451	0.229572
UBF1	1.14721	0.252929	-0.434839	0.733206	-0.234793	0.148021	0.106289	0.229545
RL37A	2.83261	4.90446	4.90983	1.17907	5.3808	5.18777	0.299755	0.226647
UTP4	1.7444	4.17798	3.01578	2.58041	3.56631	2.33001	0.153809	0.223492
TRI27	-1.03719	-0.765144	-2.02263	-0.068913	-0.919025	-2.39857	-0.14615	0.216621
KRI1	1.50844	-0.263711	0.0392877	1.37883	0.579291	-0.302593	-0.123837	0.194618
RBM19	0.766087	0.00496826	0.238436	0.481404	0.827197	-0.535561	0.0788168	0.194086
UTP6	2.10845	4.53465	3.49373	3.14669	3.65567	2.96869	0.121926	0.191267
RL1D1	7.15687	7.84284	6.81827	8.03312	7.17375	6.32435	0.0955869	0.189871
NHP2	3.05572	3.66862	4.42691	3.54453	4.35363	2.97906	0.0913455	0.186289
ESF1	2.58304	1.33345	2.19648	2.19912	1.71101	2.01291	0.0633071	0.18332
DKC1	2.64581	3.6331	2.86089	3.87907	3.19005	2.32585	-0.0850582	0.180334
RL11	4.05166	4.30771	4.05337	4.26046	5.33355	3.12129	-0.100859	0.179186
MARK2		-4.64001	-3.7852	-3.33229	-5.47182		0.189451	0.177082
UTP18	3.94197	5.29042	4.45648	5.04925	4.25387	4.16126	0.0748276	0.177054
ATPA	-1.57433	-1.48101	-2.13682	-0.757024	-1.63286	-3.12157	0.10643	0.168726
TAF1A	0.457274	1.59022	0.775192	1.91118	1.21547	-0.0183953	-0.0951912	0.165097
DDX24	3.35149	1.97663	2.65852	3.30715	2.7112	2.18659	-0.0727674	0.161839
LLPH	3.21662	3.16932	3.58684	2.93601	3.35111	3.80657	-0.0403045	0.161675
DDX17		-2.11185	-3.41688	-3.16509	-2.11095		-0.126343	0.161505
RS28	4.29545	3.8642	4.2969	4.1137	4.53018	3.69547	0.0390668	0.158367
GNL3L	-1.73794	-0.209225	-0.66967	0.467616	0.137039	-2.76286	-0.152874	0.154938
NOL11	2.04898	3.75317	2.61814	2.11578	3.3749	2.67699	0.0842058	0.154544
EBP2	5.20735	5.58561	4.77367	5.93195	4.33916	5.08526	0.0700834	0.15423
RRP15	2.23903	3.06128	2.72493	3.85188	2.34137	2.0721	-0.0800371	0.150672
ORC5	-4.56131	-1.63963	-2.59161	-2.01324	-2.43833	-3.93428	-0.135564	0.14802
LMNB1	-1.60111	-1.87586	-2.63058	-1.72252	-1.84866	-2.39612	-0.0467484	0.142825
S39A7		-0.694305	-2.27649	-1.43218	-1.14006	-1.64709	-0.078957	0.141412
RL7	5.35311	5.82339	5.31496	5.8655	5.88542	4.87868	-0.04605	0.140758
COF1	-0.800091		-4.7002	-1.37733	-3.5467		-0.288132	0.137531
ZN281	0.206268	-0.749592	-1.17842	0.18205	-0.423181	-1.2796	-0.0670045	0.128229
LRWD1	-2.01978	-1.41185	-2.68297	-1.4164	-1.5912	-2.91161	-0.0651298	0.122643
H2AJ	-0.867029	3.32374	1.93027		1.52142	1.04824	0.177494	0.122336
PCBP1	-1.95204	-0.732727	-0.300714	-0.210619	-1.10354	-1.8961	0.074927	0.121535
SNW1	-2.61729	-1.80859	-5.18619	-1.25516	-3.03869	-4.8519	-0.155442	0.120257
ANXA2	-1.84592	-3.61841		-2.72017	-1.69084	-3.48128	-0.101402	0.118784
HBE	1.05321	-0.899048	-2.35062	1.45171	-0.58244	-3.61589	0.183387	0.11629
EFTU	-3.80021	-2.54627	-5.15446	-3.27497	-4.17805		-0.107133	0.1146
NUP50	-0.875684	-0.0454867	-1.2729	0.186249	-1.07024	-1.14047	-0.0565353	0.1128
MPCP	-0.224871	-0.0596116	-1.29441	-0.0856568	0.562174	-1.81588	-0.079846	0.110797
MAK16	2.14026	3.79772	1.53678	3.09305	2.48554	2.10381	-0.0692111	0.105505
ROA2	-1.07931	-4.00147		-1.58816		-3.85248	0.179926	0.102634
RS18	3.95204	4.53884	4.23776	3.89519	4.72668	4.186	-0.0264071	0.0994867
RL15	5.19799	6.30546	6.52563	5.53388	6.47505	5.88993	0.0434103	0.0981986
GPTC4	0.0921328	1.05069	0.400084	1.48026	0.514502	-0.624932	0.0576919	0.0960411
RL32	5.44795	5.89445	6.59381	5.32841	6.70912	6.02869	-0.043339	0.0930424
DCA13	2.93314	4.5129	3.4985	3.84732	3.75625	3.21556	0.0418013	0.0928134
EF1G	-4.46649	-4.64244		-3.47726	-5.83124		0.0997878	0.0887715
UTP15	3.26115	4.72398	3.75556	4.25664	4.20256	3.15435	0.0423819	0.0842477
NOL10	1.37816	2.14891	1.64352	2.04108	1.75111	1.443	-0.0215319	0.0842132
RS9	2.92166	4.71607	4.53682	3.65941	5.50449	3.21008	-0.0664787	0.0816928
IF4A3	-0.327955	1.73544	0.394483	1.13912	0.810424	0.00286125	-0.0501464	0.0804854
TM209	-2.07807	-0.884966	-2.10275	-0.914532	-0.672124	-3.70214	0.0743386	0.0784829
SRS10	0.725631	2.04329	1.28319	2.11465	1.22441	0.590334	0.0409056	0.0777447
ILF2	-1.72874	-2.329	-3.43626	-1.26641	-3.97037	-2.44112	0.0613011	0.0731644
RAE1L	-1.42957	-1.59436	-0.934254	-0.200958	-3.03817	-0.551064	-0.0559959	0.0677396
RL18A	2.70546	4.93713	5.79002	4.0191	5.84109	3.76002	-0.0625321	0.0611754
RS16	2.5461	3.84024	4.65218	2.62167	5.00571	3.56419	-0.0510144	0.060867
RS3	-2.72649	-2.68862	-2.13887	-3.05865	-0.576078	-4.07339	0.0513812	0.0536042
NOP14	3.62463	2.26159	3.08	3.45691	2.91999	2.65435	-0.02168	0.0517676
LORF1	-3.35681	-0.380396	-2.55721	-0.716185	-1.55498	-3.84196	-0.0604314	0.0515873
RCL1	2.5494	3.74538	3.25834	3.45316	3.32701	2.71476	0.0193914	0.0513905
LENG8	-1.33785	-3.18709	-4.34729	-1.91627	-4.0086	-3.09592	0.0495203	0.0511752
BCL6B	-0.954247	1.84441	-2.66575	0.352194	-1.18031	-1.13837	0.0636317	0.0497325
ENOA	0.764196	-4.33264		-0.452852	-3.37038		0.127393	0.0449294
CENPU	-1.81927	-0.49971	-4.10876	-0.356838	-3.78521		-0.0715592	0.0412222
ZN431	-0.419097	0.83108	2.07953	-1.26727	2.18298	1.43333	0.0474891	0.0409604
PINX1	0.359632	2.26986	-0.132698	2.03013	0.768543	-0.397636	0.0319179	0.0344587
RS2	-0.467625	1.30166	0.918536	-0.156801	1.60871	0.348574	-0.0159708	0.0231856
DHX15	0.370031	-1.09115	0.0774655	0.368187	-0.425679	-0.620214	0.0113498	0.0229597
ZN728	-5.55387	-1.99224	-6.32042	-5.94785	-3.22049		-0.0380075	0.0203031
TBL3	1.53831	2.84696	2.09764	1.06214	3.04036	2.34342	0.0123283	0.0193962
UBP36	1.67442	0.643128	1.09644	1.653	1.07393	0.672542	0.00483681	0.0127472
SPB1	4.25703	3.58751	3.63489	4.47691	3.79495	3.22227	-0.00489564	0.0126087
SRRM1	1.81471	0.658653	1.58218	1.49952	1.23249	1.31192	0.00387098	0.0116231
NEP1	1.71256	3.40284	2.44358	2.02898	3.15184	2.38772	-0.00318912	0.00585151
CA131	0.610019	1.28328	0.623008	2.0766	0.664684	-0.214019	-0.00365215	0.00563018
PRP19		-1.34565	-2.66666	-2.73372	-1.27522		-0.00168407	0.00174714

## Sheet: H2AK9ac
Protein IDs	H2AK9ac_R1	H2AK9ac_R2	H2AK9ac_R3	H2Aunmod_R1	H2Aunmod_R2	H2Aunmod_R3	log2 fold change	p-value
ARGL1	3.02016	3.07778	3.14185	4.51798	4.59661	4.61865	-1.49782	17.4536
KTN1	0.170408	-0.0210951	-0.314592	0.85689	0.899406	0.846641	-0.922739	8.43479
INO80	-5.57306	-4.83009	-5.00406	-3.49736	-3.47018	-2.79296	-1.88224	7.87781
BRD7	-1.58836	-1.70133	-1.0221	-4.09761	-3.57375		2.39841	7.48679
ZSC10	0.615638	-0.0617463	-0.604766	-2.28867	-3.97652	-2.82249	3.01227	6.99318
RS6	5.99682	6.1583	5.99429	6.57593	6.97281	6.60881	-0.66938	6.89694
PPIB	-3.93978	-4.10754		-2.75069	-2.92013		-1.18825	6.65583
LAS1L	1.32311	1.35991	0.93838	0.384882	0.655702	0.380571	0.733415	6.5403
TCOF	3.0709	3.59066	3.62442	5.47733	4.66709	4.59798	-1.48547	6.46645
ZCHC7	0.75387	0.0493152	-0.35526	-1.95266	-1.55581	-3.07906	2.34515	6.17937
INCE	-4.51389	-4.19191	-3.77027	-5.4285	-4.96766	-5.27519	1.06509	6.17482
PPIA	-3.05002	-3.41005		-1.8244	-1.74945		-1.44311	5.97935
PRP6	-3.78489	-2.62582	-3.33838	-1.66433	-1.79974	-2.04624	-1.41293	5.92269
SRRM1	1.7118	2.06442	1.81551	1.49952	1.23249	1.31192	0.515939	5.87242
UBF1	1.83944	1.23733	1.44361	0.733206	-0.234793	0.148021	1.29132	5.8158
PININ	-0.318357	-1.55455	-2.44874	-3.62791	-3.93381	-3.83611	2.35873	5.68383
USMG5		-1.49653	-1.2634	-2.16265		-2.15479	0.778761	5.52603
RLA2	4.34451	4.10413	4.7216	3.48785	3.74764	3.10806	0.94223	5.51653
SRSF1	1.29829	1.53507	1.67795	-0.208165	0.636291	-0.921618	1.66827	5.45485
SC61B		-2.18938	-1.87459	-0.181679	0.187243	-0.857602	-1.74797	5.38187
ZN568	-0.678016	-2.07214	-1.27743	-2.59348	-3.2117	-2.89209	1.55656	5.36175
PB1	-3.27531	-2.04062	-2.63785	-4.57118	-3.78304	-5.12372	1.84138	5.31459
PAPD5	1.17389	0.27618	-0.00195604	-2.29687	-0.681756	-2.32251	2.24975	5.28837
NKRF	0.0984264	-0.158452	-0.625488	-2.0768	-0.955507	-1.73241	1.35973	5.26916
RLA0	3.91029	3.89028	2.84446	2.23084	2.4943	2.06729	1.2842	5.24904
DDX31	0.551872	-0.344308	-0.000445493	-2.38447	-0.85795	-2.32718	1.92557	5.21773
WDR43	5.54093	4.9533	4.9181	4.34357	4.53699	4.03052	0.833748	5.10648
PWP1	1.59757	1.82074	1.87418	0.206574	1.28456	0.40184	1.13317	5.07676
RHG21	-5.88909		-5.90176		-6.78294	-7.19958	1.09583	4.86477
RFOX2	-4.38669	-3.31656	-3.65912	-1.61564	-2.36019		-1.79955	4.81762
ZN629	-6.65027	-5.28959	-7.03196		-3.93102	-3.88246	-2.4172	4.70375
ANXA2	-4.79846	-5.49283		-2.72017	-1.69084	-3.48128	-2.51488	4.66541
TM201	-3.18392	-2.71827	-3.69923	-4.73392	-4.33064	-3.89189	1.11835	4.63964
NUCL	4.31742	3.19511	2.88295	2.35799	2.08676	1.47259	1.49271	4.55594
REPI1	-1.82206		-1.78212	-3.3336	-3.59551	-4.93234	2.15173	4.52123
ATAD3	0.693345	0.696003	0.589495	1.03884	1.42016	0.898076	-0.459409	4.46488
DDX18	4.31235	3.70807	3.59026	3.2316	3.33282	2.94399	0.700757	4.32562
SGPL1	-1.26821	-0.687203	-0.689368	1.35112	0.423381	-0.250436	-1.38962	4.30237
DHX15	2.03692	0.695575	0.878531	0.368187	-0.425679	-0.620214	1.42958	4.30168
NPM	4.60024	4.28022	4.17469	4.01015	3.33616	3.77392	0.644971	4.27007
RBBP6	-2.86334	-1.87682	-2.03627	-0.276589	-1.63237	-0.744522	-1.37432	4.26812
ZFP62	4.00315	4.11662	4.45842	3.53459	3.88335	3.76055	0.466566	4.25697
SR1IP	-1.41987	-3.75496	-2.40165	0.231376	-0.203075	-1.1588	-2.14866	4.22915
ZN292	-0.880494	-1.024	-1.89332	-0.340979	-0.245785	-0.543955	-0.889034	4.21902
CENPP	-3.54662	-3.82348	-3.0335	-1.92901	-2.61047		-1.19813	4.1795
TADBP	-3.63924	-1.89488	-2.20504	0.25535	-0.554005	-1.51276	-1.97591	4.15564
RL3	5.52355	5.58546	5.54148	6.08028	5.6731	5.83993	-0.314272	4.09964
NOL11	3.66733	3.72626	3.59726	2.11578	3.3749	2.67699	0.941059	4.01291
S39A7		-2.57147	-1.95316	-1.43218	-1.14006	-1.64709	-0.855875	3.96184
FBRL	6.46558	6.77313	6.6102	6.42036	6.3546	6.13739	0.312187	3.95403
ZN182	-0.468589	-0.197778	0.174944	-1.87462	-0.987358	-0.682544	1.0177	3.94087
RM11	-0.847299	0.157707	-1.03105	0.618981	1.19468		-1.48037	3.91792
ARP8	-3.97944	-4.52502	-4.96086	-3.36005	-1.68942	-3.54686	-1.623	3.86947
NOL9	2.83209	2.17107	2.64349	1.85092	2.23416	1.80422	0.585785	3.82625
CHD2	-1.57707	-1.5865	-2.25172	-0.676771	-1.39487	-0.0290062	-1.10488	3.80781
I20L2	2.49492	2.02717	1.65138	1.55918	1.48672	1.33385	0.597904	3.69367
RBM14	2.48657	1.66595	1.63539	1.11686	1.43819	0.576937	0.885306	3.68488
MBD4	-5.05902	-4.90245		-4.36026	-4.60941		-0.495899	3.68249
TYY1	-1.91108	-3.3217	-3.60974	-2.14835	-1.21914	-1.14789	-1.44238	3.65822
RUVB2	-2.49794	-1.02565	-3.56801	-0.60657	-0.268744	-0.896182	-1.77337	3.64978
DHB12	-2.31559	-1.29157	-2.99532	-1.04727	-0.632172	-1.23778	-1.22842	3.64466
PUM3	4.42528	3.71879	3.92789	2.81768	3.64752	3.36067	0.748697	3.64185
SMD2	-2.52026	-1.85992	-1.72385	1.81528	-0.381042	-1.15099	-2.1291	3.60609
HNRH1	-1.35013	-0.796319	-2.32779	-3.42903	-2.39911	-2.48769	1.28053	3.59733
FA60A	-3.32017	-3.15837	-4.30104	-1.27475	-2.24564	-3.01738	-1.41394	3.57413
DDX50	3.43645	3.02454	2.43922	2.42904	2.2171	1.51113	0.914315	3.56128
DDX10	2.99477	2.55119	2.26685	2.21741	2.0477	1.53147	0.672077	3.5493
RBM8A		-1.93645	-2.80789	-0.863851	-0.0355886		-1.92245	3.54909
ICE1	-3.638	-4.44575	-4.27499	-4.68373	-5.34846	-4.62211	0.76519	3.53063
SUZ12	-1.28476	-1.36208	-2.99894	-3.00023	-3.96283	-6.37175	2.56301	3.48448
PRD10		-3.1299	-2.33442	-2.1027	-1.09334	-1.4134	-1.19568	3.46373
TRIM6	-4.65581	-1.8747	-1.69495	-0.713472	-0.293775	-0.814469	-2.13458	3.42727
LARP7	1.99127	0.48669	0.813205	-0.282813	0.515584	-0.711454	1.25661	3.36957
HNRPM	1.73534	0.220655	0.643054	0.254988	-0.367794	-0.871674	1.19451	3.34487
RS17	1.77556	2.71311	2.49193	2.81459	3.50837	2.93853	-0.760295	3.34241
MYEF2	-1.58452	-2.88478	-2.53407	-3.40069	-5.22665		1.97921	3.30636
RS27A	1.65009	2.90164	1.66995	3.2324	3.67106	2.60483	-1.09553	3.30262
ZN512	-0.784824	-0.721267	-1.0431	-3.44913	-0.964527	-3.59288	1.81912	3.29968
FRG1	-3.56356	-2.22679	-3.70551	-1.9906	-0.498986		-1.92049	3.29257
RL26	4.90682	5.97143	5.83098	6.91997	7.51808	5.91219	-1.21367	3.28527
MSD3	-4.49905	-4.03863	-1.9951	-2.24742	-1.68586	-1.60163	-1.66596	3.25979
RIF1	-1.17742	-0.387044	-1.75001	-0.0574535	-0.200608	-0.467252	-0.863055	3.25368
MIC60	0.501414	0.121136	-0.271093	-0.591549	-1.0362	-3.20163	1.72695	3.2123
RRP1	3.39289	3.06086	2.90719	2.96169	2.40362	2.66682	0.442934	3.19425
NOG1	5.65623	4.89909	4.84044	4.47885	4.79315	3.95191	0.723952	3.12901
SPAT5	-1.43996	-2.09704	-3.25596	-3.19752	-3.20177	-3.8699	1.15875	3.12583
RBBP4	-1.11983	0.563134	-0.321639	1.19556	0.797524	0.377326	-1.08292	3.11273
CHD4	-5.33141	-5.43401	-4.9771	-4.93895	-4.54122		-0.507426	3.09876
MOV10	-2.13823	-2.41279	-3.70283	-3.27105	-4.89547	-4.09145	1.33471	3.08008
CI114	-0.570005	0.389902	0.936804	1.87093	1.13259	0.876827	-1.04121	3.03711
NUP62	-2.50978	-2.74931		-2.9567	-3.216		0.456803	3.02953
UIF	1.00567	1.19565	0.395901	0.598908	0.207654	-0.35004	0.713565	3.02256
PRDM5	-1.48956	-3.73561	-2.81223	-5.31059	-3.14925	-5.12993	1.85079	3.01791
MRT4	0.217378	0.307268	-0.724213	-1.58883	-0.24302	-1.88433	1.1722	3.01226
CK098	0.707841	-0.534474	-1.16609	3.27373	0.972327	0.553477	-1.93075	2.96326
NSMA3	-2.05833	-1.89209	-2.12039	-4.86161	-2.63919		1.7268	2.94517
RS30	4.91605	5.62467	3.6766	7.10043	5.72352	5.62186	-1.4095	2.93761
RCL1	4.11371	3.83366	3.35443	3.45316	3.32701	2.71476	0.602286	2.93043
SMBT2	-2.06705	-2.36507		-4.18237	-3.04742		1.39884	2.83731
DKC1	4.72522	3.68263	3.96162	3.87907	3.19005	2.32585	0.9915	2.79583
NUPL2	-0.9971	-0.785263		-1.20533	-1.58107		0.502016	2.78217
RL6	5.95294	6.13742	5.56295	5.62834	5.6326	5.3636	0.342923	2.76143
UTP6	3.9282	3.63151	3.50596	3.14669	3.65567	2.96869	0.43154	2.75884
HJURP	-0.631265	-1.55268	-1.88671	-2.67785	-1.88211	-5.35666	1.94865	2.68293
MYO1B	-1.70772	-1.14701	-2.13081	-3.53407	-1.57805	-3.63618	1.25426	2.6447
ILF3	0.0705916	-0.522918	-1.40316	-0.864911	-1.79076	-2.57339	1.12453	2.64012
SRSF6	1.91795	2.78255	1.98391	2.15485	1.13747	1.12611	0.755324	2.6339
TBL3	2.92251	3.41598	3.17917	1.06214	3.04036	2.34342	1.02391	2.63269
BCLF1	0.460055	1.65562	1.36579	1.05059	-0.0743852	-0.535464	1.01357	2.62123
ZN431	2.54762	2.90643	2.31369	-1.26727	2.18298	1.43333	1.80623	2.60693
WDR75	2.53774	2.56773	1.81723	0.987192	2.26008	1.3977	0.759243	2.59501
RS15	-0.000429146	2.26978	2.98415	2.65706	3.62713	3.91584	-1.64885	2.5843
RL39	3.63329	3.51059	2.38729	4.65624	3.83764	3.59256	-0.851756	2.55178
SON	-2.48395	-3.16578		-3.48966	-4.15129		0.995614	2.5474
AT2A2	-3.08486	-3.14184	-3.85947	-5.02164	-5.04323	-3.24649	1.07507	2.54705
UTP20	2.32372	3.15817	2.55451	2.87357	3.62156	3.18368	-0.547469	2.53485
SRSF7	3.9904	4.72742	4.026	3.35502	4.16955	2.36475	0.9515	2.53173
H12	8.15339	7.6876	7.51313	9.30967	8.63158	7.78806	-0.791732	2.52061
UTP4	3.52106	3.67723	3.24644	2.58041	3.56631	2.33001	0.655999	2.51881
RS27	1.05339	3.1266	2.03622	3.52665	2.68697	3.1989	-1.06543	2.51626
WDR46	5.52465	4.51997	4.24472	4.11467	4.3564	3.61053	0.735911	2.5159
PHF20	-3.17248	-3.66418	-4.96822	-2.7119	-3.36228	-2.95464	-0.925358	2.48323
LLPH	0.0976088	2.52932	2.96947	2.93601	3.35111	3.80657	-1.4991	2.46256
NAA40	-1.73244	-2.99382		0.222083	-1.19388		-1.87723	2.42453
RL4	6.86946	6.5223	6.47942	6.61416	6.08739	5.41895	0.58356	2.4171
H10	4.17871	3.45036	3.60633	4.50811	4.51039	3.7763	-0.519805	2.39563
SSRD		-2.69391	-1.79882		-1.14256	-1.49281	-0.928681	2.37317
ZFP14	-1.68883	-1.34229	-0.436451	-2.75639	-1.39711	-1.84374	0.843226	2.33532
MYO1C	-3.11734	-0.985532	-2.451	-3.25287	-2.90118	-3.37393	0.991372	2.32673
RL19	7.46708	6.6457	7.37589	7.94456	8.02034	7.20894	-0.561721	2.31906
LC7L2	-2.23781	-0.831086	-0.854946	0.557011	-1.28257	0.116738	-1.10501	2.31112
PESC	4.50881	3.83933	3.78361	3.58397	3.89279	3.41171	0.414427	2.30366
BBX	-3.78297	-3.43342	-5.3246	-1.92259	-3.80734	-3.17529	-1.21192	2.28223
NOG2	1.31082	1.1583	0.112375	0.602994	0.208036	-0.316603	0.695691	2.27915
TR150	1.40558	2.92643	2.23205	1.81827	1.52603	0.928149	0.763873	2.25302
PWP2	4.52432	3.55705	3.52651	3.74485	2.7828	3.15365	0.642194	2.24792
RL12	3.89126	3.82087	2.52568	2.38553	3.27374	1.9058	0.89091	2.24784
NUP98	-3.05616	-3.04601		-4.16849	-3.47732	-3.23092	0.57449	2.24473
SMRC1	-2.57646	-0.673625	-0.839543	-2.02887	-2.32741	-2.51105	0.925898	2.23562
PCBP1	0.502483	0.208769	-0.977002	-0.210619	-1.10354	-1.8961	0.981502	2.22632
RFC5	1.52365	2.06967	1.44079	2.5857	2.59906	1.57722	-0.57596	2.21482
U5S1	-1.76399	-1.67422		-2.39027	-2.08448	-1.77145	0.362963	2.20276
GLE1	-1.83107	-1.86835	-2.06216	-3.97166	-2.08034		1.10547	2.19907
NOP58	6.60876	6.13964	5.69388	5.92832	5.79423	4.95785	0.587293	2.19605
ESF1	3.03284	2.31325	2.01064	2.19912	1.71101	2.01291	0.477894	2.14112
ATAD5	0.983883	1.8926	0.981128	1.8586	1.88113	1.51284	-0.464987	2.14019
LMNB1	-0.664084	-1.53079	-1.93942	-1.72252	-1.84866	-2.39612	0.611003	2.13571
H1T	1.23486	-0.539509	0.127652	1.47743	1.46072	0.489459	-0.868202	2.12706
PHF11		-2.19678	-3.3511	-4.68489		-3.58193	1.35947	2.11606
TEX10	-1.18234	-2.53796	-4.52748	-0.856691	-1.18102	-1.90132	-1.43625	2.11027
DHX33	0.0624771	0.764402	0.137265	-3.31864	0.765522	-1.47257	1.66328	2.06789
HSP7C	2.62818	2.15746	2.06635	2.06785	2.09918	1.93333	0.250543	2.06304
EED	-1.92994	-1.37259	-2.34735	-1.68206	-1.44131	-1.24561	-0.426965	2.06157
ROA3	-3.59623	-2.6757	-3.08099	-3.74388		-3.52039	0.514496	2.04758
RL13	6.52115	6.26661	6.45379	6.80974	7.06945	6.31896	-0.318863	2.04264
U3IP2	5.19772	4.77297	4.35641	4.70162	4.35285	3.89517	0.459154	2.03139
RL23	3.8933	4.60881	3.41034	4.68193	4.86883	4.08283	-0.573714	2.03023
BRX1	3.79089	3.9527	3.4766	3.48865	1.92332	3.56442	0.747933	2.01459
PRR11	-1.35921	-1.84354	-2.23147	-1.69289	-2.64664	-4.09801	1.00111	2.00396
NOLC1	4.91733	3.83437	3.49877	4.1947	2.65727	2.76855	0.876646	1.99194
RBM28	4.79701	3.58296	3.15287	3.33026	3.39312	2.56147	0.749333	1.98847
NU133	-3.7589	-4.97535		-5.63513	-5.86147	-4.54088	0.978701	1.97907
ORC5	-3.81728	-3.00397	-4.28549	-2.01324	-2.43833	-3.93428	-0.906964	1.94091
DDX51	4.7237	4.10017	2.88744	3.1598	3.64711	2.23937	0.888343	1.93867
NOP10	3.66109	3.17428	3.7276	3.79144	3.57258	4.12736	-0.30947	1.92871
RUVB1	-1.53019	-1.46833	-2.25814	0.131493	-1.44388	-1.58674	-0.785841	1.91858
RL8	5.74249	5.18414	4.94881	4.74597	5.34539	4.28513	0.499649	1.91042
ESCO2	-0.13453	-0.0560831	-0.717565	-0.7356	-0.309638	-2.2679	0.801653	1.87701
SUN1	-3.65772	-3.92362	-3.49157	-3.35818	-3.26286	-3.72978	-0.240698	1.86737
ENY2	0.672804	0.271276	-0.142821	2.16925	0.993029	0.0762766	-0.812431	1.83958
ZN809	-3.21829	-3.76727		-1.66422		-3.08495	-1.1182	1.83779
ZN184	-4.20075		-3.19888	-7.16105		-4.46201	2.11172	1.83618
H11	9.01953	9.10963	8.3358	10.0327	9.77745	8.57265	-0.639284	1.83604
NOL6	1.21702	0.792755	-0.34955	0.229663	0.169599	-1.23972	0.833561	1.82841
H2A2C	1.39896	0.222763		1.44399	2.93397		-1.37812	1.81786
UPP2	-0.0870002		-4.0648		-4.58908	-5.47188	2.95458	1.81576
DDX54	3.57899	2.35087	1.86396	2.63941	1.37112	1.31255	0.82358	1.80685
H2B1F	5.83606	7.57119	7.53765	7.74653	8.90314	7.12457	-0.943115	1.78483
NOC2L	2.25435	1.20245	1.17553	0.995694	1.10619	1.21805	0.437464	1.77486
SNF5		-2.45225	-1.96019	-2.24413	-3.03825	-4.1859	0.949869	1.76149
RL7	6.1909	5.89058	5.81678	5.8655	5.88542	4.87868	0.422885	1.76013
DDX49	2.01694	2.64876	2.37761	3.52456	2.40063	2.54961	-0.477162	1.75723
FBX28		-4.15214	-4.90011		-3.76423	-4.13378	-0.577119	1.73363
SRS10	1.95791	2.37515	1.43674	2.11465	1.22441	0.590334	0.613469	1.72504
PCM1	-5.3503	-5.4123	-5.0567	-4.25861	-5.56708	-4.54295	-0.483552	1.70916
RM54	-1.31953	-0.0392257	0.182919	0.197955	0.351628	-0.0389198	-0.562167	1.69855
RRP5	2.96483	3.68757	2.91437	2.12588	3.35151	2.57267	0.505569	1.6836
HNRPF	0.468592	1.59133	1.12055	1.11825	0.456216	0.0523389	0.517892	1.67167
RL23A	5.41479	6.36314	6.33124	7.0023	8.21548	5.65705	-0.921889	1.67015
BOP1	4.21495	3.72621	3.14011	3.71827	3.09435	2.89968	0.456321	1.66986
TRA2B	3.52901	3.5601	3.31849	3.82589	2.60488	2.47287	0.501316	1.66393
ZFP1	-3.96405	-1.20156	-2.81546	-0.94487	-0.49863	-2.84545	-1.23071	1.65808
RS11	4.04238	3.90483	3.47317	4.9998	5.137	3.34419	-0.686866	1.65788
RS23	4.08008	6.19275	5.49508	5.87341	6.45879	5.70246	-0.755579	1.65462
RFC3	1.68301	2.44681	2.24502	2.50885	2.16425	2.59732	-0.29853	1.63811
RL10	4.26727	3.86333	4.10978	4.00478	5.04206	4.30279	-0.36975	1.62049
ATPG	2.55351	3.21614	2.68846	3.14372	3.88323	2.74214	-0.436991	1.61766
NOP56	7.52313	6.82993	6.56975	6.93965	6.70402	5.60293	0.558738	1.61291
NSE2		-2.58308	-2.61152		-1.7706	-2.49331	-0.465345	1.61264
MUM1	-3.2673	-5.12979		-5.49445	-5.29994		1.19865	1.60429
F111A	-2.28575	-2.72733	-3.64045	-2.30984	-1.53217	-2.92708	-0.628144	1.5978
XRN2	0.458709	0.116155	-1.14216	-0.305938	-0.897947	-1.18361	0.606735	1.5878
PRD12	-4.84572	-2.62136	-0.369087	-1.72234	-1.13672	-0.63259	-1.44817	1.5672
NOP2	6.34157	4.94149	4.54983	5.22931	4.48103	3.99864	0.707966	1.56478
CEBPZ	3.14458	2.45917	1.85231	2.33677	1.90794	1.91431	0.432347	1.55699
TAF1A	-0.247208	1.30116	-0.555014	1.91118	1.21547	-0.0183953	-0.869774	1.55309
SMRD1	-3.47486	-0.996049	-2.01305	-2.3318	-2.83554	-4.32587	1.00308	1.53876
MYO5A	-1.45875	-0.575987	-1.41094	-1.32897	-1.34274	-1.8443	0.356776	1.53812
TAF1B	0.564898	0.596603	0.790809	-0.068519	0.942553	0.0140772	0.354733	1.53465
RRP7A	1.36533	1.41354	0.00341979	0.877279	0.323118	-0.207593	0.596496	1.53303
NAT10	5.29458	5.41001	5.04022	4.6812	5.38239	4.93879	0.247477	1.52961
AFG31	-3.06374	-5.62887	-4.66963	-2.39194	-4.26774	-3.73332	-0.989744	1.51968
KI18A	-2.90836	-2.22638	-3.13507	-4.8135	-2.68617	-3.03728	0.755706	1.51936
KMT2A	-5.01701	-6.15834	-7.29252	-4.37499	-5.72735	-5.82855	-0.845657	1.49916
ORC4	-4.40048	-2.79264	-2.93961	-2.51408	-1.62505	-3.59484	-0.799585	1.49067
HP1B3	0.873869	-0.78337	-2.15934	-2.1572	-0.577724	-2.72877	1.13162	1.48664
PARP1	-0.907637	-0.183192	-0.657377	-1.24319	-0.654143	-0.725927	0.291685	1.47596
DDX47	3.79477	4.08109	3.64808	5.04316	4.38227	3.52072	-0.47407	1.47478
MGN2		-0.234254	-0.405153	-2.18162	-0.473536		1.00787	1.4692
CTCF	-1.66723	-0.60042	-0.171678	-1.45177	0.722451	1.10355	-0.937853	1.46694
LDHA	-4.08357	-3.25398		-1.79074	-3.41628		-1.06527	1.4604
NOL10	2.50811	1.9714	1.67417	2.04108	1.75111	1.443	0.306166	1.45938
NDUA4	-1.06624	1.8968	2.48106	2.21483	2.05417	2.42194	-1.12644	1.45417
ZFP28	-1.98157	-0.876925	-0.662363	-3.29698	-1.15592	-1.46471	0.798917	1.45241
RAB18	-4.61854	-2.65714		-3.04639	-0.476956		-1.87617	1.45189
SETD5	-4.67215	-6.19328		-3.96417	-4.86436		-1.01845	1.44104
RL35A	4.60412	3.92641	4.78638	4.12666	3.51445	4.49695	0.392945	1.44056
LENG8	-1.3727	-2.94139	-2.39642	-1.91627	-4.0086	-3.09592	0.770091	1.44037
MBB1A	9.22473	9.16171	8.68115	8.85605	8.96258	8.66866	0.193434	1.43204
LYAR	3.60522	3.49472	3.83547	5.33303	3.58173	3.73292	-0.570755	1.42382
PISD	-3.43012	-1.41237	-1.71951	-2.25682	-0.972613	-1.07491	-0.752552	1.423
LRWD1	-1.86481	-2.3101	-5.12276	-1.4164	-1.5912	-2.91161	-1.12615	1.42272
NLE1	-0.799275	-0.0683411	-0.806771	-2.07402	-0.156205	-1.25937	0.605069	1.41324
HYDIN	-6.53386	-8.78447		-6.65594	-6.0272		-1.3176	1.40911
MIC19	-0.0545183	-1.34684	-2.22261	-0.168912	-0.236873	-1.12926	-0.696309	1.40674
RRP8	2.71619	1.99706	1.30133	2.16142	1.53062	0.278218	0.68144	1.40391
NOL8	3.12602	2.70444	1.85928	2.51103	2.08267	1.86432	0.410575	1.38962
SMCE1	-4.06912	-1.99461	-2.11956	-3.12069	-4.40896	-3.00933	0.785226	1.37272
RAI14	-4.23212	-5.42927	-4.70849	-4.79628	-6.10191		0.659131	1.34757
IKZF3	-4.52318	-2.25164	-1.76943	-4.69731	-3.12255	-3.50933	0.92831	1.3446
RIOX1	1.91755	1.33685	0.444523	1.17317	1.04381	-0.345743	0.609233	1.32067
IMP3	2.1421	4.50349	4.03064	3.92665	5.00355	4.0035	-0.752485	1.32053
ZFP39	-2.55901	-2.15536	-0.591432	-1.1101	-1.59577	-0.790685	-0.60308	1.31444
ORC2	-1.36016	-3.20167	-5.96982	-1.50579	-1.95373	-3.09454	-1.32587	1.30932
DDX52	1.33236	0.374415	-0.170473	0.0180689	0.565588	-0.564959	0.50587	1.29473
NACC1	2.38273	2.69067	2.42022	2.51162	2.52241	1.40065	0.35298	1.28408
RBM19	1.44857	0.965165	-0.016011	0.481404	0.827197	-0.535561	0.541562	1.27392
RL27	7.28053	9.12923	9.05951	8.59211	9.94665	8.91964	-0.663041	1.26907
RL22	2.11241	4.98661	4.36376	4.53291	5.29695		-1.094	1.26513
HNRPC	4.14886	3.67603	2.89311	3.31137	3.06563	3.32585	0.338379	1.25574
ANR11	-3.94462	-4.00667	-4.59577	-2.76888	-3.74414	-4.54631	-0.495908	1.24648
UT14A	4.801	3.83429	3.18056	3.82457	3.50956	3.10101	0.460237	1.24414
RS15A	-0.62952	2.23316	0.354133	1.0687	2.9888	0.80822	-0.969315	1.24374
MAGT1	-2.93939	-2.80013	-3.87115	-2.73535	-1.16559	-3.6018	-0.702645	1.24092
RL27A	3.98435	6.11147	3.70543	5.73364	6.16488	4.38438	-0.827215	1.23784
MAK16	2.6587	4.19606	2.4708	3.09305	2.48554	2.10381	0.54772	1.23326
RFC2	0.429645	2.34382	1.94929	2.00775	2.75237	1.68586	-0.574406	1.19929
RFC4	2.44041	2.87394	1.37777	3.38314	2.63784	2.14997	-0.492945	1.19528
GRP78	0.560112	-0.0158813	-0.984747	-0.50766	-0.0207606	-1.57069	0.552864	1.19125
DDX5	2.51375	1.56665	1.11029	2.13318	1.29784	-0.503597	0.754426	1.18417
SPB1	5.01678	4.33476	3.56544	4.47691	3.79495	3.22227	0.474289	1.18305
NU214	-2.42764	-6.14615	-5.40487	-2.6641	-3.82811	-4.31814	-1.0561	1.17929
CENPO	-2.76467	-2.73567	-4.5959		-3.97498	-4.16324	0.703696	1.17618
NOP16	5.05848	3.31601	4.18268	5.73857	4.60493	4.02658	-0.604303	1.17342
UTP15	4.58965	4.48036	3.70187	4.25664	4.20256	3.15435	0.386114	1.17234
RL34	4.64652	5.20468	4.4785	3.03655	5.49837	3.87917	0.638537	1.16715
RRP1B	6.69101	5.93488	5.78065	6.10264	5.98907	5.42847	0.295452	1.16422
RS25	1.01294	3.0947	1.79067	2.96247	3.26458	1.64837	-0.659038	1.15848
GNL3	4.85194	4.03343	3.75275	4.13737	4.14076	3.2364	0.37453	1.1563
NOP14	4.23045	3.50293	2.61134	3.45691	2.91999	2.65435	0.437824	1.14981
H2A1F	7.32676	7.18422	6.77712	9.11073	8.4716	6.05351	-0.782577	1.1381
ZNF12	-2.88842	-2.79721	-2.13986	-4.18277	-2.42988	-2.68408	0.490415	1.13131
RAE1L	-0.378838	-0.525039	-0.690608	-0.200958	-3.03817	-0.551064	0.731903	1.1183
TBP	-0.0179562	0.624613	-0.185093	-0.98639	0.403726	-0.146804	0.383677	1.11003
RS10		-3.74202	-3.76515	-3.53077	-4.61868	-4.13222	0.340304	1.10862
DNJB6	-4.62397	-1.2573	-4.70297	-1.02623	-1.77567	-4.18481	-1.19918	1.10805
TRA2A	-1.62246	1.07825	-1.10267		-0.430602	-3.10947	1.22108	1.10503
MYNN	-1.91229	-4.99375	-3.58128	-3.52933	-5.45332	-4.06731	0.854214	1.10431
TIM50	-1.34932	-0.523625	-0.617424	-0.834483	-0.876941	-1.71124	0.310763	1.09931
RLP24	4.28602	3.56162	-0.903245	5.99754	3.89424	1.89043	-1.6126	1.09767
WDR74	2.30116	3.25798	2.46286	2.84787	2.33619	1.84324	0.331563	1.09461
CMS1	1.04787	0.589587	-0.2912	0.595556	0.269069	-1.04674	0.509458	1.09255
LRC59	-1.61193	-1.02289	-3.04755	-0.142114	-0.48413	-2.67285	-0.794423	1.09131
ILF2	-1.11727	-0.866975	-3.14784	-1.26641	-3.97037	-2.44112	0.848606	1.08865
RRP12	3.1745	3.58344	2.36696	3.02771	3.77656	3.3152	-0.331524	1.08075
RL36A	3.60495	5.76613	5.90254	4.63621	6.41946	6.50083	-0.76096	1.08049
RL17	4.72433	4.17303	3.90154	5.14344	5.81634	3.53841	-0.566429	1.0766
FCF1	4.73827	3.73258	3.92951	5.6229	4.43685	3.78555	-0.481646	1.05773
PO5F1	-0.328844	-1.07872	-0.293721	-0.73801	-2.975	-0.100852	0.704195	1.05452
TOP1	0.242771	1.02596	0.440039	0.988897	0.98992	0.427183	-0.23241	1.05067
PGAM5		-3.32	-3.18996		-1.8387	-3.36775	-0.651753	1.04363
CHTOP	1.33517	-0.504012	0.396047	1.21276	-2.3535	-0.305774	0.891238	1.04171
SRSF3	3.7772	3.58593	2.16351	3.2818	3.43651	-0.0545648	0.954299	1.03834
DDX17	-1.16855	-2.82465	-2.19558	-3.16509	-2.11095		0.575095	1.02355
H13	10.2214	10.3196	8.81938	10.7952	10.7087	9.37175	-0.505088	1.02314
UBP36	2.13174	1.68019	0.723666	1.653	1.07393	0.672542	0.378705	1.01851
JARD2	2.50331	1.60898	0.855708	1.67928	1.10954	1.00806	0.390374	1.01574
NOL7	4.75157	5.21359	4.43539	5.54792	5.13386	4.54512	-0.275448	1.01104
G3P	-1.19851	-0.27077	-3.59295	1.03031	0.158026	-2.82153	-1.14301	1.01042
PR40A	-4.3367	-2.43797	-4.06526	-4.8443	-3.72633		0.672	1.00927
SSF1	4.56974	3.33255	3.49171	4.34302	3.22525	2.18018	0.548518	1.00796
IF4A1		-2.47769	-4.07065	-2.98534	-2.05194		-0.755525	1.00256
RL24	4.73081	5.0383	3.9732	5.96817	5.9624	3.65069	-0.612985	0.991164
TRIPC	2.78908	1.91914	1.51295	2.53304	2.48982	2.08503	-0.29557	0.989902
DDX21	8.03411	6.98681	6.28909	7.03434	6.83157	6.20626	0.412614	0.983636
RL21	4.88107	4.55865	3.65833	5.01015	5.53658	3.8801	-0.442931	0.976325
SMCA4	-3.87712	-1.42273	-1.18008	-2.22996	-2.14152	-4.64677	0.846107	0.953778
NOM1	2.15705	1.79589	1.55866	2.02838	2.14255	1.77726	-0.145533	0.953463
NVL	4.23894	3.33743	2.51059	3.32169	3.29665	2.11041	0.45274	0.949058
RL32	4.40929	6.03662	6.15726	5.32841	6.70912	6.02869	-0.487679	0.946508
AT1A1		-5.18901	-5.35146	-5.97547	-4.01394	-3.9404	-0.626964	0.943796
BCL6B	-2.43836	1.04388	-3.75912	0.352194	-1.18031	-1.13837	-1.06237	0.935824
TDIF2	4.84212	3.97334	3.13534	4.22002	3.56124	2.84587	0.441221	0.932512
DIM1	-0.103574	0.360449	-2.19244	0.60151	0.421781	-1.01507	-0.64793	0.923227
DDX24	3.65883	3.3581	2.28143	3.30715	2.7112	2.18659	0.364476	0.919892
UTP11	4.68634	4.46303	4.0764	4.39367	4.43962	3.86375	0.176246	0.91581
ACL6A	-4.09733	-2.66758	-2.61782	-2.67018	-1.72881	-3.52809	-0.485216	0.909573
TECR	0.987197	1.6917	1.23549	0.645877	2.61948	1.88917	-0.413381	0.898679
SRFB1	1.62876	0.347598	0.372648	1.5623	-0.332135	-0.45807	0.525636	0.898283
LAP2B	1.23471	1.39508	0.279273	1.33706	0.710645	-0.346364	0.402574	0.887903
AATF	3.61336	2.405	1.94858	2.64053	2.69225	1.29084	0.447775	0.87832
NOC3L	3.90052	3.31941	2.82736	3.1027	3.17787	3.14907	0.205881	0.878129
RBM34	4.17219	3.12601	2.91932	3.7599	3.04961	2.25602	0.383995	0.874006
WDR3	3.68405	3.59004	2.45662	2.95297	3.43712	2.34665	0.331326	0.868753
RL35	4.86141	6.77342	4.48562	5.52941	7.50973	5.09484	-0.671178	0.865233
RS24	1.40704	3.81451	4.06246	3.53786	4.22483	3.27139	-0.583358	0.864273
SGO2	1.91354	2.26666	1.44583	1.93117	1.70474	1.45366	0.17882	0.860548
MMTA2	-4.91891	-1.21607	-2.66082	-2.35007	-1.35205	-2.83432	-0.75312	0.856238
CDC5L	-2.46608	-2.57581		-2.09779	-3.09369	-3.37679	0.335148	0.856136
SF3B1	-3.67907	-2.39368	-4.66711	-5.0653	-3.47634		0.690866	0.856091
PP1G	-1.21232	-0.897463	-2.26261	-1.22728	-1.47573	-3.02405	0.451552	0.85575
H15	8.90018	8.81647	7.32667	9.62963	9.07645	7.77616	-0.47964	0.843083
DDX3L	-2.56367	-3.4228	-3.44462	-3.24623	-2.48849	-2.99552	-0.233622	0.842199
RL7A	6.70117	6.74925	6.03479	6.30433	6.7542	5.70506	0.240537	0.829968
RS28	2.52753	3.85486	4.70318	4.1137	4.53018	3.69547	-0.417926	0.809309
CCD86	1.6306	-0.866342	-1.16216	-0.114646	-1.80414		0.826761	0.807194
TAF1D	-1.10488	0.976306	1.45307	1.49932	0.614762	0.739783	-0.509789	0.802324
RL37	3.23391	5.40408	2.96554	4.41451	3.56533	5.31394	-0.563416	0.800025
PRSR1	-2.3744	-1.39007	-1.92715	-1.67006	-1.79185	-3.3419	0.370729	0.797354
SNW1	-0.387441	-2.18398	-3.94966	-1.25516	-3.03869	-4.8519	0.874888	0.781809
ZFP59	-1.94898	-2.45493	-1.13738		-1.72934	-2.72684	0.380991	0.780941
HELLS	-2.0432	-4.45244		-3.42628	-1.84062	-2.4992	-0.659126	0.776916
RS18	3.34152	4.45646	4.25787	3.89519	4.72668	4.186	-0.250672	0.776892
RL15	6.03893	5.88261	6.60429	5.53388	6.47505	5.88993	0.208994	0.776478
PLAK	-4.49115	-6.14709	-3.1188	-5.63541	-3.91603	-1.64542	-0.853393	0.766817
NUP85	-2.23084	-4.77973	-4.34754	-2.65472	-3.25008	-3.9274	-0.508639	0.761659
PRC1	-1.42696	-3.72843		-3.10142	-2.29778	-4.47272	0.712949	0.760584
DDX56	3.37006	2.73517	2.36509	3.31251	2.45578	1.77804	0.307997	0.751984
TM209	-0.878792	-1.56992	-1.12817	-0.914532	-0.672124	-3.70214	0.570639	0.745983
AROS	0.552331	-0.0235033	-1.05388	1.76941	0.1473	-0.884942	-0.518941	0.744828
KDM2B	-5.14768	-5.24307		-5.8282	-5.04886		0.243154	0.739797
RL30	5.05813	5.55552	4.68835	4.15919	5.39714	4.98854	0.252379	0.739624
BAP18	3.3147	-2.63344	-3.29408	-1.82773	-1.20999	-3.30972	1.24488	0.735919
RRS1	5.08614	4.35737	3.87689	4.91406	4.11217	3.30209	0.330691	0.734577
FBLL1	-2.42592	3.74506	-3.50821	-1.95791	-0.851561	-3.41489	1.3451	0.732539
TIF1B	-1.59887	-1.80301	-4.6972	-1.62998	-2.25335		-0.758027	0.727315
PPHLN		-2.29824	-2.80964	-1.62557	-4.029	-3.72326	0.572003	0.72457
UTP18	4.58615	4.76364	4.59776	5.04925	4.25387	4.16126	0.161055	0.724137
BLM	-2.24338	-3.4939	-4.0475	-2.84133	-4.76701	-3.47927	0.434278	0.721343
PRP8	-4.69738	-2.25702	-3.80223	-3.8145	-2.26701	-3.2722	-0.467636	0.714695
RRBP1	0.185772	0.965358	0.151393	0.757296	0.298246	-0.507002	0.251328	0.712578
ZDBF2	-4.9069	-4.10212	-5.70677	-3.54778	-6.4695	-2.6473	-0.683737	0.709357
RL14	7.10146	5.07196	6.06805	6.63489	5.8207	4.31333	0.490851	0.704688
ABT1	2.31593	2.29298	1.7847	2.63992	2.48571	1.78463	-0.172215	0.704115
HMGA1	-2.65972		-0.336047	0.130601		-1.46679	-0.829787	0.699519
NGDN	2.95696	3.15782	2.7249	3.7624	2.94503	2.69085	-0.186199	0.690543
RL18	6.78165	7.01501	6.27718	6.51774	7.27688	5.29053	0.329564	0.684416
BNC2	-3.91036	-4.56731	-4.96771	-3.09257	-4.96076	-4.38222	-0.336609	0.683364
EBP2	5.88876	5.54855	4.81161	5.93195	4.33916	5.08526	0.297518	0.68292
RL18A	3.96735	5.57742	5.39618	4.0191	5.84109	3.76002	0.440247	0.681103
S61A1	0.597959	0.104529	0.400483	-0.116905	0.99276	0.817953	-0.196946	0.676831
MTF2	-0.922232	-1.98507	-1.45217	-1.11083	-1.26578	-3.09152	0.369552	0.670288
ROA2	-1.44055	-3.85984	-5.7864	-1.58816		-3.85248	-0.975282	0.6645
PSPC1	0.672487	0.498242	0.274902	1.39442	0.470401	0.17597	-0.198385	0.659184
RL13A	4.77321	4.45804	4.42048	4.32654	4.82265	4.14654	0.118662	0.656087
MPP10	5.83862	4.41001	4.14616	5.15819	4.35068	3.90007	0.32862	0.653867
ALBU	-3.50614	-2.04289	-6.58498	-1.48925	-4.45671		-1.07169	0.64941
REXO4	2.03224	2.28321	1.89978	2.90963	2.39711	1.53753	-0.209681	0.642596
HS90B	-0.356196	-0.578188	-1.33664	0.175297	-1.23057	-2.44377	0.409341	0.641541
RS14	5.40159	5.24794	3.5762	5.81058	5.19481	4.31221	-0.363957	0.635759
MS3L1		-5.7092	-4.00992	-2.78873	-5.63265	-4.26935	-0.629316	0.631623
CC137	-1.25614	-2.48282		-0.982636	-4.99014		1.11691	0.627427
NOP9	-0.0460504	0.00447039	-0.594909	-1.08418	0.308394	-0.513106	0.217468	0.616265
OGT1	-0.0372347	0.988702	-0.261488	0.140841	0.364058	-0.488033	0.224371	0.616128
RL11	3.89951	4.10026	3.77596	4.26046	5.33355	3.12129	-0.313195	0.614855
GANP	-1.82468	-3.00082	-4.20778	-2.16232	-3.37168	-5.04485	0.515189	0.601784
MATR3	0.560911	-0.310204	-1.23638	-0.0478305	-0.749769	-1.03732	0.283084	0.599986
PRP19	-1.84292	-0.617089	-2.31668	-2.73372	-1.27522		0.412245	0.597365
ML12B	-2.35568	0.13871	-0.00909068	0.225428	0.764056	-1.66853	-0.51567	0.595195
H14	6.97729	6.21597	5.20811	7.73529	6.73384	5.20111	-0.42296	0.595073
RL1D1	8.18802	7.2755	6.93997	8.03312	7.17375	6.32435	0.290756	0.593566
PRP4B	-1.57832	-2.22233		-1.10238	-2.9315	-2.82059	0.384494	0.590511
HBA	4.43177	3.54895	1.59181	4.47065	3.57436	-1.17431	0.900607	0.584331
RS2	1.46097	1.73603	-0.268016	-0.156801	1.60871	0.348574	0.376168	0.578914
H2AJ	-0.388343	2.98819	3.48472		1.52142	1.04824	0.743357	0.577268
DCA13	3.12785	3.91163	3.36024	3.84732	3.75625	3.21556	-0.139804	0.577189
RL5	4.69085	4.19396	3.9676	5.25171	4.48103	3.77329	-0.217876	0.573944
NEP1	2.22427	3.14943	2.77403	2.02898	3.15184	2.38772	0.193066	0.568819
RL10A	6.38155	5.04952	5.20922	5.4494	6.15964	4.00792	0.341109	0.563523
ATPA	-1.44517	-1.90492	-3.36203	-0.757024	-1.63286	-3.12157	-0.400221	0.557286
ZN322	1.04543	-0.267703	-0.206529	0.136234	0.189319	-0.370193	0.205278	0.554749
TOP2A	-2.16824	-1.34251	-2.13286	-2.60909	-1.21518	-2.51472	0.231794	0.553682
SAS10	5.63458	4.4579	4.11348	5.22424	4.54836	3.55271	0.29355	0.548927
NU107	-3.74712	-3.12982	-5.54479	-5.6766	-4.98174	-3.12577	0.454127	0.539686
CTNA1	-3.2278	-2.77252	-5.28522	-4.27114	-4.13175		0.4396	0.535869
HBE	0.391414	-0.0628333	-1.10692	1.45171	-0.58244	-3.61589	0.656097	0.532035
NHP2	1.9628	3.64558	4.2573	3.54453	4.35363	2.97906	-0.337179	0.529565
ZN728	-3.62422	-3.71891	-4.92091	-5.94785	-3.22049		0.496156	0.524147
RL36	5.60086	5.48553	3.142	5.09062	4.55549	3.42868	0.384537	0.50814
LBR	2.8755	2.7898	2.29955	2.67734	2.81391	2.13812	0.111826	0.50741
RL9	-2.74852	-1.4905		-2.62453	-0.589732		-0.512383	0.49389
ELYS	2.86306	3.05165	1.65861	2.59903	2.60721	1.7437	0.207791	0.492289
RBP2	-1.93752	-2.99364	-2.99414	-2.16754	-2.40259	-2.86908	-0.162033	0.490933
DDX55	-3.66759		-4.448	-4.09976	-5.2835	-3.63279	0.280891	0.485545
ORC1	4.00954	3.56626	3.10395	3.72368	3.42982	3.16817	0.11936	0.479915
RPN1	-2.08143	-2.33026	-2.65379	-3.11589	-1.67615	-2.81402	0.180192	0.473603
CA131	1.84048	1.16373	0.425197	2.0766	0.664684	-0.214019	0.300714	0.473365
HNRPU	4.0769	2.56367	1.76853	3.24216	3.21744	2.74949	-0.266666	0.471911
ZN106	0.934642	1.24967	0.449635	0.93824	1.02737	0.299108	0.123076	0.462911
BAZ1B	-3.81149	-3.21267		-2.50339	-3.43451	-3.92909	-0.22308	0.458233
TBA1B	-0.0331311	-0.565293	-2.36675	1.05502	-0.216316	-2.42326	-0.460208	0.456377
ERH	2.73256	3.93806	4.13329	3.63973	3.86121	2.67223	0.210246	0.452021
IMB1	0.315021	-1.56872	-1.05212	-0.0465109	-2.18217	-0.996696	0.30652	0.449721
RL28	5.60017	6.57056	6.03034	5.43688	6.93825	6.39909	-0.19105	0.449095
COIL	2.05112	0.473296	0.100087	1.82093	0.356466	-0.540688	0.329266	0.441723
TUSC3	-2.54401	-1.36052	-2.81536	-2.14935	-1.55526	-2.45639	-0.186298	0.438667
GPTC4	0.963835	0.305936	-0.745955	1.48026	0.514502	-0.624932	-0.282004	0.438404
H32	7.10843	8.51819	8.451	7.73424	8.89123	8.06828	-0.205374	0.43753
LORF1	-0.13237	-0.39931	-3.93033	-0.716185	-1.55498	-3.84196	0.550371	0.436738
RPF2	4.47289	4.87623	4.68984	5.05513	4.87637	4.35723	-0.0832574	0.423324
ZN281	0.380856	-0.416499	-2.47084	0.18205	-0.423181	-1.2796	-0.328582	0.421381
RS4X	3.56043	3.09263	3.10641	2.98345	4.06712	2.10277	0.202043	0.417657
LN28A	5.31518	4.43963	3.92729	5.03877	5.11724	4.06331	-0.17907	0.411791
RL7L	3.16901	3.54457	2.55329	3.69863	4.09415	2.13892	-0.221612	0.405422
CH60	-4.50603	-4.66114		-3.19876	-5.24495		-0.361728	0.399517
GNL3L	0.986433	-1.39729	-0.536626	0.467616	0.137039	-2.76286	0.403575	0.393599
SF3B3	-4.86119	-3.21985	-5.98127		-3.69037	-6.68776	0.50163	0.389243
ADT2	1.65379	1.79631	1.55866	1.37601	2.51039	1.46995	-0.115866	0.377435
RL31	0.313397	1.56841	0.982101	2.05836	1.56205	-0.0691459	-0.229118	0.373946
MCM5	-3.92849	-3.63975	-3.44989	-5.14288	-2.77403		0.285744	0.373507
RL29	7.33522	5.61614	5.64349	7.30407	6.39294	5.59789	-0.233346	0.373404
TAM41	-4.02644	-2.56042	-2.67176		-2.28934	-4.53633	0.326629	0.371445
ZFP2	-4.23621	-3.32564		-4.69862	-3.56312	-3.6326	0.183856	0.370983
NSD1	-1.40545	-2.63667	-3.55915	-1.10524	-2.26803	-3.38949	-0.279503	0.37048
GLYR1	5.09537	4.23714	4.10058	5.24861	4.25886	3.34324	0.194128	0.36941
SMD3	-0.70695	0.59945		-1.24957	0.69333	-0.427313	0.274099	0.368521
SMCA5	1.83497	2.18297	1.37163	1.85922	1.99019	1.2372	0.100983	0.367484
MSL1	-1.96755	-1.93368	-2.72679	-0.934962	-2.47466	-4.07631	0.285969	0.364307
U2AF1	-1.85601	-2.15639		-1.42052	-2.1186	-3.04947	0.189995	0.36016
IF6	4.0687	3.98898	3.92234	3.77617	4.62143	3.21477	0.122545	0.357672
CENPU	-1.39059	-2.45369	-3.78639	-0.356838	-3.78521		-0.472536	0.355267
F207A	1.76599	-1.24889	-2.59821	1.10477	-1.24007	-0.64556	-0.433416	0.353433
THOC4	-2.44284	-2.39038	-3.52416	-1.63996	-3.23432	-2.94216	-0.180312	0.351928
RS5	4.22002	3.2167	3.0409	4.65311	4.45552	2.14456	-0.258522	0.349715
NH2L1	6.02564	6.43916	4.80995	6.1051	6.21253	4.26297	0.231382	0.346152
ZN296	-0.91787	-2.57128	-2.46351	-0.413947	-3.21041	-3.25226	0.307988	0.340531
NPA1P	1.34123	1.59699	0.622168	0.761401	1.48142	1.01258	0.101658	0.336949
SRSF5	4.36743	4.13553	4.06177	4.49709	4.23902	3.58878	0.0799488	0.334004
RT24		-3.807	-2.72537	-3.64517	-2.39391		-0.246644	0.333432
MPCP	-0.291541	-0.272026	-1.44992	-0.0856568	0.562174	-1.81588	-0.22471	0.330778
TXTP	-3.04709	-2.89845	-2.3857	-4.9457	-1.54427	-2.68579	0.281505	0.328976
NOC4L	2.71193	1.78133	1.93027	2.66472	2.00551	1.36281	0.130162	0.327053
PO121	-1.07692	-2.31311	-2.39217	-1.22763	-1.45336	-3.88397	0.260918	0.326636
CDCA2	1.27226	1.10566	0.390678	1.37991	1.14476	0.545662	-0.10058	0.326107
HS90A		-3.43298	-5.71738	-4.93664	-3.41194		-0.400889	0.325833
RS26	2.43967	4.51833	3.5974	4.12891	4.88055	2.3301	-0.261389	0.321569
STAU1	-0.22285	-2.52304	-3.34992	-1.19859	-1.9633	-3.94098	0.335683	0.321328
VIME	-0.336047	-0.347137	-3.37259	0.557904	-0.785371	-5.50912	0.560271	0.31703
GA2L3	-1.34701	-5.43189		-3.51563	-2.98606	-5.07148	0.468276	0.315679
ACOD2		-3.31974	-1.78656	-3.36939		-0.919601	-0.408653	0.314896
AIFM1	-2.2174	-3.11865	-3.33913	-2.33322	-3.01198	-3.00901	-0.106992	0.308745
RBM39	2.45472	1.73525	1.52749	2.95306	1.82472	1.36634	-0.142221	0.307011
LYRIC	-1.71438	-2.3597	-1.21864	-0.848619	-1.93022	-2.11789	-0.132	0.303163
RL37A	2.94322	4.83457	5.12814	1.17907	5.3808	5.18777	0.386097	0.298068
NEPRO	-0.743839	-2.03599	-1.17189	-0.698034	-1.04626	-1.82828	-0.126381	0.29496
YBOX1	2.47315	1.18907	1.01642	2.65258	0.622343	0.81959	0.194705	0.289571
H2AX	-2.24434	1.07373	1.3693	1.96697	-0.0080487	-0.729789	-0.34348	0.286871
TAF1C	2.14496	1.0908	0.0199424	1.58037	0.674619	0.49355	0.169053	0.284685
H4	6.39936	7.9603	8.01708	6.62769	8.56351	6.57553	0.203337	0.284491
DNJC9	0.263105	0.482349	-1.62405	0.647917	0.543921	-1.39471	-0.22524	0.281289
BYST	1.40017	2.25107	1.2632	2.48177	1.69415	0.21652	0.173999	0.279511
ACTB	4.64147	4.58431	3.87441	5.57264	3.80753	4.14064	-0.140203	0.27702
SRSF2	-0.270544	-0.552301	0.511696	-0.607057	0.628457	-0.707858	0.125103	0.274934
AURKB	-2.5823	-2.6012	-3.41912	-2.26754		-3.78369	0.158076	0.272042
CALM3		-2.83153	-1.96169	-1.86782		-3.34264	0.208623	0.268486
HBB1	2.12835	1.67558	0.93752	2.8209	1.24185	0.098787	0.193305	0.262627
RS13	4.36963	4.61355	4.03775	4.27654	5.08507	3.30594	0.117791	0.254622
RRP36	0.800023	-0.427813	0.562137	1.26309	0.385104	-0.329634	-0.12807	0.251563
NSUN5	0.38176	1.4045	0.593102	1.81795	1.06359	-0.0962391	-0.135311	0.247396
TBB4B	-3.60534	-2.8306		-3.31627	-3.29105		0.085687	0.242048
KIF23	-1.25944	-0.447869	-1.49957	-1.35036	-0.662456	-1.43798	0.0813059	0.235343
DDX27	4.50296	3.22653	2.73087	3.81592	3.30337	2.9904	0.116889	0.234222
RGAP1	-0.560569	-1.36968	-2.16868	-1.58128	-0.720524	-1.47448	-0.107545	0.232483
AHDC1	-1.16904	-1.21869	-3.201	-1.53065	-1.61333	-2.89245	0.149232	0.215367
ODF2L	1.87176	-2.56658	-0.296549	-1.12756	2.01249	-0.974488	-0.300605	0.211887
NIP7	0.659229	2.41517	2.79086	0.569594	3.24362	2.61708	-0.188342	0.20887
UTP23	2.59189	2.39139	1.28993	2.50684	2.84699	1.25899	-0.113204	0.207358
KNOP1	4.23921	3.62412	3.26899	4.58023	3.9027	2.94696	-0.0991921	0.207326
BAZ1A	-1.17963	-0.929931	-1.77618	-1.7092	-1.14193	-0.843386	-0.0637433	0.20591
CTNB1	-5.12378	-6.32848	-3.90454	-4.97902		-4.93791	-0.160466	0.20034
BAZ2A	1.33116	-0.96789	-3.06641	-0.767824	-1.08114	-1.52645	0.224092	0.20023
TRI27	-1.10032	-1.30938	-1.32263	-0.068913	-0.919025	-2.39857	-0.115276	0.193594
K22O	3.62949	4.11382	4.52394	3.69259	4.03694	4.7373	-0.0665294	0.190232
EMD	-2.01893	-2.06135	-2.38527	-3.12263	-1.40686		0.109564	0.187549
PELP1	-2.1502	-1.54946	-3.51739	-1.84842	-2.09887	-2.94573	-0.108012	0.18477
IMA1	0.687715	0.311655	-0.879222	0.964946	0.461884	-0.951199	-0.118494	0.182759
PCNT	-4.81959	-3.65341	-5.62784	-3.32716	-5.63875	-5.58983	0.151633	0.182136
CR021	-0.331297		-1.10875	-0.19282	-0.130598	-1.52006	-0.105529	0.181387
H2AV		2.28196	1.93566	0.972431	3.46857	2.34013	-0.151572	0.180793
EF1A1	0.669634	0.728759	-0.340661	1.41449	0.24481	-0.953047	0.117158	0.174748
LA	1.62925	1.45811	0.507784	2.28182	1.49793	0.140264	-0.108293	0.172766
F208B	-4.2572	-5.92874		-4.91574	-5.55533		0.142568	0.171282
SENP3	0.914697	0.0235151	0.123199	0.751394	0.65109	-0.56983	0.0762523	0.170839
MYH10	-0.032804	0.478618	-0.456946	0.392915	-0.052761	-0.515929	0.0548812	0.166102
SMC5	-4.1478	-2.32376	-4.27212	-2.38359	-2.91294	-5.99874	0.183866	0.162217
SURF6	4.12841	4.12002	3.25157	4.78274	3.64686	3.29528	-0.0749575	0.159523
PK1IP	-1.76324	0.781292	0.0185886	-0.342502	-0.438702	-0.495904	0.104582	0.15753
RS8	6.64117	6.55262	6.06153	6.49432	7.31948	5.64982	-0.0694322	0.153301
MRRP1		-0.575556	-2.78106	-1.32609	-0.750778	-2.52658	-0.143827	0.150378
U520	-4.65331	-2.09567	-4.35073	-5.49023	-1.94861	-4.17659	0.171905	0.148755
ATPB	-3.14773	-4.50854		-2.24253	-3.62634	-5.15282	-0.15424	0.142925
SOX2	0.00187498	-0.938441	0.294658	0.704565	-1.47362	-0.148059	0.0917364	0.14135
KRI1	1.41287	0.694825	-0.204504	1.37883	0.579291	-0.302593	0.0825548	0.138499
RPF1	3.87001	3.91541	3.61676	4.31498	3.51346	3.46869	0.0350182	0.136416
TBB5	-0.672052	-0.75855	-1.59557	0.464489	-1.35584	-2.45981	0.108328	0.13575
ORC3	-1.3079	-2.08423	-3.1408	-2.92873	-1.59035	-1.77494	-0.0796364	0.132972
PINX1	0.775755	0.920549	0.951352	2.03013	0.768543	-0.397636	0.0822062	0.13201
RBM25	-3.18496	-2.6673		-1.4655	-3.21961	-3.77643	-0.105616	0.126893
KI67	4.08207	3.36545	2.8469	3.96853	3.26428	2.90281	0.0529349	0.125434
RASK		0.295206	-0.88981	-2.72799	1.61933		0.257029	0.120935
NOL12		-1.55949	-0.599892	-1.26226	0.681401	-3.12229	0.154693	0.116511
REST	-0.968139	-0.505695	-1.12458	-0.896729	-0.945145	-0.693995	-0.0208475	0.116506
NONO	0.787111	-0.103887	0.644476	1.37695	0.00193998	-0.227321	0.0587108	0.115286
TAP26	0.319343	-0.355401	-0.588046	0.361726	0.470879	-1.68002	0.0744354	0.111273
RRP15	4.02244	2.51285	1.97374	3.85188	2.34137	2.0721	0.0812252	0.110264
RL38		0.994534	0.415456	-0.241505	2.19688	0.448839	-0.0964092	0.110226
RS3A	3.53607	2.7	2.93329	3.68897	3.30915	2.30735	-0.045368	0.105525
IF4A3	-0.0657811	1.4156	0.737903	1.13912	0.810424	0.00286125	0.0451068	0.0922773
LUC7L	0.615967	1.62238	1.58579	1.57905	0.544873	1.82537	-0.0417198	0.0907871
MSL2	-3.89493		-3.6341	-4.32833	-3.29089		0.0450932	0.0885145
DHX9	-2.03525	-1.49824	-4.11005	-3.44713	-1.83498		0.0932053	0.0853766
CDA7L	-2.44558		-3.84229	-2.55743		-3.88285	0.076206	0.082963
IMP4	3.21859	4.38352	3.57374	3.43954	3.988	3.66746	0.0269466	0.0788333
HDAC1	-0.962652	-1.73357	-0.82304	-0.696207	-1.57354	-1.1705	-0.0263379	0.0769237
PLPL6		-4.79346	-2.57738		-4.94825	-2.16701	-0.127791	0.0751467
PNO1	2.82382	2.38731	1.90125	2.39944	2.58961	2.06123	0.0206955	0.074526
RS16	2.30205	4.81148	4.28571	2.62167	5.00571	3.56419	0.0692251	0.0744218
TET1	3.94162	3.92954	3.22989	3.89291	3.69134	3.56702	-0.0167424	0.0731662
GAR1	3.29591	1.88753	1.90279	3.16596	2.49687	1.28675	0.0455466	0.0699236
CLK3	-3.07362	-2.38429	-3.30017	-3.36022	-2.66504	-2.66663	-0.0220659	0.0678865
U2AF2	-1.8587	-3.78136	-3.15686	-1.98004	-3.05087	-3.89684	0.0436118	0.0607597
PABP1	-1.02313	-2.70107	-6.56861		-2.66484	-4.42839	0.11568	0.0563332
TTF1	-0.745136	-0.28022	-1.51666	-0.71261	-0.673482	-1.10684	-0.0163613	0.0465638
MYH9	-1.20769	-0.501226	-2.97048	-1.0626	-0.995322	-2.51003	-0.0371462	0.0461294
KRR1	3.92765	3.75905	2.8299	4.90287	3.40457	2.3108	-0.0338796	0.0451067
MYL6	1.22503	0.985259	1.43887	1.69398	1.64447	0.256166	0.0181798	0.040777
NUP50	-0.235116	-0.90665	-0.830145	0.186249	-1.07024	-1.14047	0.0175178	0.0399912
ZCHC9	0.870559	-0.141447	-0.100664	0.580939	0.284897	-0.281736	0.0147828	0.0389171
GRP75	-3.13093	-4.99892	-5.53509	-3.09695	-5.91188		-0.0505669	0.0385594
SDA1	-0.817576	-3.19623	-2.76532	-1.53968	-2.90385		-0.0379423	0.0379954
HNRPD		-1.93966	-2.91355	-1.89257	-2.43974	-3.00358	0.0186939	0.0364534
MK67I	5.21237	4.97323	3.87176	5.15197	4.37525	4.57366	-0.0145077	0.0334944
ASPH	-2.64323	-1.56521	-3.29693	-1.38545	-2.31115	-3.74203	-0.0222447	0.0285486
RS9	3.07358	4.70242	4.53983	3.65941	5.50449	3.21008	-0.0193821	0.0242387
WDR12	1.84741	3.70805	2.98339	2.69006	3.23657	2.64472	-0.0108346	0.0205716
RALY	1.76505	1.269	0.41383	0.842822	1.40713	1.21872	-0.00692986	0.0176226
RFC1	1.00985	1.48832	0.711903	1.38689	1.09306	0.716995	0.00437426	0.0159772
LITD1	0.480219	-0.20366	-0.965436	0.397912	-0.231716	-0.878885	0.00793723	0.0155026
RS3	-2.64786	-2.45381		-3.05865	-0.576078	-4.07339	0.0185413	0.0147153
ROA0	-2.11683	-1.16979	-2.1613	-1.19919	-2.86686	-1.36312	-0.00625133	0.0109257
WDR18	-2.85091	-2.11071	-1.98562	-1.59115	-1.77168	-3.57692	-0.00249383	0.00392123
NSA2	2.68808	3.09094	1.92486	3.18476	3.25073	1.27082	-0.000810997	0.00119636
