# Supplementary material for: Cleavage of histone H2A during embryonic stem cell differentiation destabilizes nucleosomes to counteract gene activation
Source: J Biol Chem. 2026 Apr 9;302(6):111437. doi: 10.1016/j.jbc.2026.111437 (PMC13156748; doi:10.1016/j.jbc.2026.111437)
Supplement: Data S7 [file mmc10.xlsx]

## Sheet: Sheet1
Protein IDs	iBAQ FL_day0_IgG_R1	iBAQ FL_day0_IgG_R2	iBAQ FL_day0_IgG_R3	iBAQ FL_day0_R1	iBAQ FL_day0_R2	iBAQ FL_day0_R3	iBAQ L23_day0_IgG_R1	iBAQ L23_day0_IgG_R2	iBAQ L23_day0_IgG_R3	iBAQ L23_day0_R1	iBAQ L23_day0_R2	iBAQ L23_day0_R3	ratio to IgG	FL-1	FL-2	FL-3	L23-1	L23-2	L23-3	log2 fold change	p-value
H2A1H	4.5249	3.68325	1.40645	11.3809	11.1461	11.0472	3.21844	3.57191	2.67224	10.3801	10.3101	10.5694		6.85596	7.46281	9.64075	7.16167	6.73818	7.89711	0.720853	1.08026
H4	4.15692	4.11215	1.80512	11.0321	11.1197	10.8961	3.47674	3.44413	3.93231	10.7015	10.4102	10.7295		6.87514	7.00758	9.091	7.2248	6.96605	6.7972	0.661891	1.26941
H2B1P	2.96232	2.3223	-0.995487	10.0462	10.1276	10.0602	2.0218	1.90761	0.365778	10.0653	9.70023	9.86879		7.08385	7.80529	11.0557	8.04349	7.79262	9.50301	0.201891	0.173093
H32	-0.833445			9.37153	9.78582	9.45518	-0.652536			9.06578	8.96898	9.16315		10.205	9.78582	9.45518	9.71831	8.96898	9.16315	0.531844	2.61095
IGHG1	10.0089	10.2776	9.16227	9.09047	9.15707	9.65077	9.63873	9.53097	9.82942	10.7611	10.6531	9.38074		-0.918383	-1.12052	0.4885	1.12233	1.12211	-0.448676	-1.11539	2.31943
RLA2	1.23097	-0.173304	-0.646429	8.3574	8.44355	8.37232	0.211685	1.68445	1.52322	8.01995	8.00298	8.29892		7.12643	8.61685	9.01875	7.80826	6.31854	6.7757	1.28651	2.73124
RLA1	3.35218	-0.587825	0.508935	8.33927	10.0903	8.46966	3.01258	2.21968	-0.459902	7.89848	8.94723	8.69775		4.98708	10.6781	7.96073	4.8859	6.72755	9.15765	0.951608	0.582776
RL14		0.451834		7.7918	7.73966	7.77618	-0.79012	1.52438	-1.55203	7.40975	7.3762	7.85351		7.42221	7.28783	7.77618	8.19987	5.85182	9.40554	-0.32367	0.369598
RL7A	-1.61854	-1.57583		7.43514	7.48783	7.50246	-0.806844	-0.665678	-0.326274	7.09783	7.13431	7.3383		6.54955	9.06366	7.50246	7.90468	7.79998	7.66457	-0.0845199	0.129546
RS8				7.42221	7.71347	7.47094				7.25764	7.28285	7.22022		7.34807	7.71347	7.47094	7.25764	7.28285	7.22022	0.257254	3.69091
ACTB	0.882037	0.565639	-2.40351	7.43159	7.13554	6.84699	-0.239422	0.681455	1.06815	6.71222	7.34397	8.02242		0.078016	6.5699	9.2505	6.95164	6.66251	6.95427	-1.55667	0.740926
RS30				7.34807	7.20618	7.21462				6.89618	6.93316	6.96377		7.28411	7.20618	7.21462	6.89618	6.93316	6.96377	0.303934	10.6002
KV2A7	7.23453	7.76907	6.67759	7.31255	7.92963	8.253	6.80298	7.06746	7.48618	9.16065	9.02619	8.15669		7.08768	0.160563	1.57541	2.35767	1.95872	0.670515	1.27892	0.766403
RS14	-0.175466			7.10864	7.08981	7.12162	-1.33426	-0.874528	-1.03677	6.49644	6.4987	6.73221		8.09345	7.08981	7.12162	7.8307	7.37323	7.76899	-0.222681	0.813819
RS25				7.08768	7.49435	7.37046		0.472367		6.46582	7.00981	6.65616		-3.96971	7.49435	7.37046	6.46582	6.53745	6.65616	-2.92144	1.04386
RL12	-1.05025	-1.69542		7.04321	6.73976	6.90967	-3.15403	-2.2618	-1.92401	6.4803	6.46175	6.74562		6.3358	8.43517	6.90967	9.63433	8.72355	8.66963	-1.78229	3.97407
IGKC	10.968	7.04169	7.32544	6.99829	7.05279	7.39347	7.21499	7.15728	9.29583	9.05987	8.17868	7.37363		6.03741	0.0111044	0.0680329	1.84488	1.0214	-1.9222	1.72416	1.01239
RL18	0.615701	-1.70443		6.9515	7.10828	7.21405	-1.85216	0.398271	0.122977	7.11172	6.85531	7.12404		7.36754	8.81271	7.21405	8.96388	6.45704	7.00106	0.324105	0.431848
RL27A	0.924249			6.96166	7.02429	7.05556		1.08805		6.92406	6.80097	6.914		7.62005	7.02429	7.05556	6.92406	5.71292	6.914	0.71631	2.44453
RS16	-0.395805	-1.59828	-2.69673	6.97173	6.44254	6.5312	-1.67663	-1.28132	-1.66538	6.30229	6.16152	6.63533		7.48715	8.04082	9.22792	7.97892	7.44285	8.30071	0.344471	0.788384
RL13	-0.655929	-0.318586	-2.68509	6.96413	7.14731	7.05544		-1.22146	0.429667	6.82931	6.91431	6.8039		6.97039	7.46589	9.74053	6.82931	8.13577	6.37423	0.945836	1.3252
RS9	-0.526731			6.96041	6.92676	6.77112			-2.74427	6.66606	6.54208	6.67986		7.42695	6.92676	6.77112	6.66606	6.54208	9.42413	-0.502478	0.669357
RL30				6.97039	7.43621	7.36492				7.2153	6.98571	7.33644		6.96884	7.43621	7.36492	7.2153	6.98571	7.33644	0.0775084	0.544073
RLA0	-0.457123	-2.80563	-3.33349	6.96983	6.9196	6.93845	-1.64891	-1.24354	-1.55237	6.69375	6.54649	6.60655		7.88073	9.72523	10.2719	8.34266	7.79003	8.15893	1.19542	2.45662
RS28				6.96884	7.13701	6.92844				6.73747	6.66735	6.62478		10.4093	7.13701	6.92844	6.73747	6.66735	6.62478	1.48172	1.94826
RS4X	-0.920445	-0.321361		6.96028	7.14718	6.84723	-3.25171	-1.43109	-1.86014	6.71219	6.70478	7.02062		6.90616	7.46854	6.84723	9.9639	8.13587	8.88076	-1.91953	5.18115
RL7	-3.50788	-4.20748		6.90146	6.9688	6.78691				6.60065	6.47907	6.92349		7.07931	11.1763	6.78691	6.60065	6.47907	6.92349	1.67976	1.72139
RS26		0.101204		6.90616	7.00581	7.15256	-0.375744	-0.787643	0.472958	6.66573	6.45548	7.11096		6.93109	6.90461	7.15256	7.04147	7.24312	6.638	0.0218878	0.126871
RL8	-0.163437			6.91587	5.57833	6.90776	1.36615	0.864211		6.85577	6.69831	6.87845		8.07322	5.57833	6.90776	5.48961	5.8341	6.87845	0.785716	1.32576
RL32				6.93109	5.99193	6.07774				5.76383	7.01675	6.85699		6.87737	5.99193	6.07774	5.76383	7.01675	6.85699	-0.230174	0.60087
RL6	-1.12655	-3.92498		6.94667	6.85053	6.88135	-2.97025	-0.278952	-2.2029	6.46846	6.39777	6.74602		6.86245	10.7755	6.88135	9.43871	6.67672	8.94892	-0.18168	0.131938
RS19				6.87737	6.93769	6.7278				6.39947	6.35097	6.70813		8.04818	6.93769	6.7278	6.39947	6.35097	6.70813	0.751703	2.72351
RS18				6.86245	6.90645	6.78298			-2.50633	6.36432	6.48054	6.7309		6.87245	6.90645	6.78298	6.36432	6.48054	9.23724	-0.506737	0.693651
RL34	-1.18905			6.85913	6.90518	6.76608				5.57772	6.8276	6.76308		8.49674	6.90518	6.76608	5.57772	6.8276	6.76308	0.999871	2.18589
RL26			-2.13278	6.87245	5.99947	5.83913	-1.70962		-1.47808	6.66825	6.33121	5.85346		6.8049	5.99947	7.9719	8.37787	6.33121	7.33154	-0.421451	0.654088
RL9	-1.60847	-0.904933		6.88827	7.01823	6.97324	-0.452999			6.66094	6.74984	6.72264		7.51255	7.92316	6.97324	7.11394	6.74984	6.72264	0.607513	3.11892
RL4				6.8049	7.02127	6.91271	-1.18837			6.413	6.55419	6.87022		6.80699	7.02127	6.91271	7.60137	6.55419	6.87022	-0.0949377	0.360377
RL13A	-0.696128	-2.06654		6.81643	6.76003	6.68864	-0.740932	-1.05597	-0.749434	6.77328	6.46751	6.53214		6.81441	8.82658	6.68864	7.51422	7.52348	7.28157	0.00345146	0.00536688
RS20				6.80699	6.66519	6.87596			-1.0671	6.5231	6.77439	6.56605		6.77598	6.66519	6.87596	6.5231	6.77439	7.63315	-0.204498	0.781949
RL22				6.81441	6.94212	6.79612		-0.440507		6.46791	6.59103	6.87146		6.78177	6.94212	6.79612	6.46791	7.03154	6.87146	0.0497001	0.338435
RS10				6.77598	6.74638	6.40247				6.4565	6.09971	6.37716		5.38845	6.74638	6.40247	6.4565	6.09971	6.37716	-0.132021	0.3773
RL35				6.78177	7.17195	7.20152				7.33669	7.15772	7.10693		6.78406	7.17195	7.20152	7.33669	7.15772	7.10693	-0.147936	1.38061
RS11	1.40605	-1.00791		6.7945	6.87191	7.16973			-1.00008	6.95697	6.75742	6.95787		9.11015	7.87981	7.16973	6.95697	6.75742	7.95795	0.829114	1.7944
RL23A				6.78406	6.65491	6.81846				6.69397	6.78132	6.75414		7.2736	6.65491	6.81846	6.69397	6.78132	6.75414	0.172517	1.2927
RL35A	-2.36294	-1.98371		6.74721	6.45893	6.6518			-1.132	6.67763	6.52661	6.56924		6.67219	8.44264	6.6518	6.67763	6.52661	7.70124	0.28705	0.509777
RS6	-0.514085	-1.25731		6.75952	7.1493	6.93384	-0.415655	-1.50852	-1.67453	6.82612	6.95334	6.50012		6.67886	8.4066	6.93384	7.24178	8.46187	8.17466	-0.619666	1.33655
RL21				6.67219	6.65168	6.80796				6.58109	6.4197	6.44804		6.2619	6.65168	6.80796	6.58109	6.4197	6.44804	0.090905	0.687766
RS27		-1.5971		6.67886	6.69297	6.54589	0.903524	1.83099		6.09237	6.14023	6.61396		5.1728	8.29007	6.54589	5.18885	4.30924	6.61396	1.2989	1.67873
RL24	0.426608	1.21851	-0.855892	6.68851	6.21625	5.91834		0.526223		6.26624	5.12129	6.23243		9.13038	4.99774	6.77423	6.26624	4.59507	6.23243	1.26954	1.35872
RL37A	1.5283	1.75105	-0.525791	6.7011	7.07584	7.2073	0.726877	1.18785	1.09067	6.01816	7.23387	6.82545		6.72524	5.32479	7.73309	5.29128	6.04603	5.73478	0.903679	1.81365
RS13	-2.41386	-2.34346	-3.53283	6.71652	7.15341	7.00695		-2.27735	-1.78057	7.24479	7.03953	6.93414		6.72982	9.49687	10.5398	7.24479	9.31689	8.71471	0.496694	0.473231
RL18A		-2.92564		6.72524	6.9364	7.03069	-2.51253	-0.878378		6.92455	6.99772	6.87399		6.71443	9.86204	7.03069	9.43708	7.8761	6.87399	-0.193337	0.177249
MYL6				6.72982	6.74688	6.62956				6.79515	6.691	7.02072		6.72071	6.74688	6.62956	6.79515	6.691	7.02072	-0.136572	1.95539
RS17				6.71443	6.2793	6.27867				6.42091	6.54797	6.60299		8.30657	6.2793	6.27867	6.42091	6.54797	6.60299	0.430891	0.837461
RL3				6.72071	6.68765	6.68246				6.78896	6.4162	6.70381		5.36465	6.68765	6.68246	6.78896	6.4162	6.70381	-0.391399	1.1924
RL11	-1.58309			6.72348	7.00653	6.92936	-2.623			6.43989	6.56371	6.72198		7.65272	7.00653	6.92936	9.06289	6.56371	6.72198	-0.253325	0.362205
RS23	1.3568	2.41704	0.565716	6.72145	6.79993	6.78627	1.13266	0.572774	0.393555	6.66881	6.344	6.51671		6.78942	4.38288	6.22056	5.53615	5.77122	6.12315	-0.0125553	0.0183269
RS2	-0.981466	-2.82463	-4.06267	6.67125	6.67565	6.44692	-2.07603	-3.31965		6.33515	6.34152	6.36146		6.80847	9.50028	10.5096	8.41118	9.66118	6.36146	0.794838	0.698584
H12	-0.122408	-0.00961528	-1.89277	6.66701	7.3378	7.30311		0.358456	-0.784116	7.57444	7.35087	6.91143		6.58451	7.34742	9.19588	7.57444	6.99241	7.69554	0.288473	0.437901
RS7	-0.144836	-3.25729	-3.12457	6.66364	6.77264	7.06672	-2.84218	-1.52786	-1.79479	6.10141	6.65168	7.11721		6.567	10.0299	10.1913	8.94359	8.17954	8.912	0.25103	0.24203
RL36				6.58451	6.83367	6.8528				6.79264	6.96693	6.92389		6.57295	6.83367	6.8528	6.79264	6.96693	6.92389	-0.141346	2.01663
RL38		1.53616		6.567	6.95929	6.22796				5.80084	5.73954	6.43557		7.88577	5.42313	6.22796	5.80084	5.73954	6.43557	0.520303	0.914971
RS12				6.57295	6.26623	6.46853				6.16134	6.46294	6.40433		6.53358	6.26623	6.46853	6.16134	6.46294	6.40433	0.0799076	0.863115
RS3	-1.29695	-3.41685		6.58883	6.91576	6.90349	-0.751745	-4.99463	-4.32985	6.82039	6.68485	6.80205		6.51705	10.3326	6.90349	7.57213	11.6795	11.1319	-2.21012	1.83868
RL17				6.53358	6.01781	6.71651				6.51536	6.73485	5.88392		8.23495	6.01781	6.71651	6.51536	6.73485	5.88392	0.611711	1.20769
RS3A				6.51705	6.92446	6.80291		-4.74378	-4.9164	6.82028	6.90562	6.48817		6.49455	6.92446	6.80291	6.82028	11.6494	11.4046	-3.21744	3.17525
NPM	-1.70368			6.53126	6.55093	6.62695				6.26409	6.13356	5.7131		6.02876	6.55093	6.62695	6.26409	6.13356	5.7131	0.365297	2.1896
RL37				6.49455	6.71064	6.00182				7.31509	6.35448	6.33497		8.09568	6.71064	6.00182	7.31509	6.35448	6.33497	0.267866	0.475014
ERH	0.473434	0.575369		6.50219	6.80507	6.76342		-0.280673		7.26534	6.75718	6.88041		6.63727	6.2297	6.76342	7.26534	7.03786	6.88041	-0.517738	4.12024
SMD1	-1.65047	-2.68549		6.44521	6.60307	6.58858	-2.48275		-2.55051	6.63393	6.45796	6.79655		7.69652	9.28856	6.58858	9.11668	6.45796	9.34706	-0.44935	0.454018
RL27	-0.220648			6.41662	6.28431	5.84316	-1.93068	-0.715275		6.53742	6.481	6.20587		8.05818	6.28431	5.84316	8.46811	7.19628	6.20587	-0.561536	0.778195
RL31	-1.27571	-2.05865		6.42081	7.40887	7.36724	-0.946073	-1.66843	-0.781788	6.972	6.83056	7.23783		6.33111	9.46752	7.36724	7.91808	8.499	8.01961	-0.423609	0.565885
RS5	-1.65877			6.39941	6.65553	6.43816		-2.464		5.92277	6.20003	6.46812		9.82143	6.65553	6.43816	5.92277	8.66403	6.46812	0.620068	0.565101
RL19				6.33111	5.94737	6.30085				6.4799	6.38236	7.0161		3.50374	5.94737	6.30085	6.4799	6.38236	7.0161	-1.37547	2.31012
MYH9	-3.4832	-5.05638		6.33823	6.31296	6.10077	-3.34411	-3.61305	-4.00624	6.09823	6.1801	6.65202		6.56107	11.3693	6.10077	9.44234	9.79315	10.6583	-1.95419	1.64345
H11	2.82481	3.29021	1.03564	6.32855	6.19209	6.4765	0.460118	2.40118	0.496555	6.50706	6.28456	6.20021		6.30073	2.90188	5.44086	6.04694	3.88338	5.70366	-0.33017	0.321426
SRSF3	-0.22043	-1.56438		6.34064	6.46613	6.57033	-2.35247	-2.86087		6.39153	6.20049	6.63289		6.56217	8.03051	6.57033	8.744	9.06136	6.63289	-1.09175	1.76532
RL28				6.30073	6.34901	6.4105				6.0034	6.43985	7.03507		6.21086	6.34901	6.4105	6.0034	6.43985	7.03507	-0.16932	0.717606
RS24	-0.24811	-1.48151		6.31406	6.61046	5.96419	-1.31031	-0.355788	-1.84093	5.8883	6.23255	5.88336		6.15944	8.09196	5.96419	7.19861	6.58834	7.72429	-0.431883	0.742868
RL15			-4.19851	6.21086	6.61707	6.43646				6.53279	6.49428	6.62342		6.16377	6.61707	10.635	6.53279	6.49428	6.62342	1.25511	1.22733
RS29				6.15944	6.35662	6.15783				6.1624	6.48318	6.6945		6.15671	6.35662	6.15783	6.1624	6.48318	6.6945	-0.222972	1.96599
ML12B				6.16377	5.96414	5.91123	-1.32542			6.00862	5.89834	6.09336		6.09618	5.96414	5.91123	7.33404	5.89834	6.09336	-0.451398	1.41358
SRSF6				6.15671	6.26397	6.29214				6.80056	6.03539	6.63511		6.10473	6.26397	6.29214	6.80056	6.03539	6.63511	-0.270072	1.63129
SRSF1				6.09618	6.30796	6.30646				6.49374	6.33651	6.79164		6.58431	6.30796	6.30646	6.49374	6.33651	6.79164	-0.141054	1.20473
RL10				6.10473	6.1955	5.94426				4.63361	5.6723	6.19857		6.08222	6.1955	5.94426	4.63361	5.6723	6.19857	0.572499	1.80534
H33	-0.480607			6.10371	6.44568	7.02459	-1.6818	-1.40795		7.61855	7.12156	7.04192		6.06468	6.44568	7.02459	9.30035	8.52951	7.04192	-1.77894	3.86402
RL10A				6.08222	6.13492	6.05247				6.0087	6.0502	5.73032		5.98456	6.13492	6.05247	6.0087	6.0502	5.73032	0.127577	1.6968
RL23				6.06468	5.88276	5.89401	-1.40889			5.4336	5.51379	6.42678		5.87377	5.88276	5.89401	6.84248	5.51379	6.42678	-0.377504	1.35634
RS15				5.98456	5.63792	5.4351				5.21607	5.11046	5.03586		10.1137	5.63792	5.4351	5.21607	5.11046	5.03586	1.94145	1.87471
H31				5.87377	3.21227	2.50089				2.3499	2.96858	3.88172		8.14258	3.21227	2.50089	2.3499	2.96858	3.88172	1.55185	1.17157
RL5	-4.35719			5.75652	5.67801	5.80403				4.83826	5.45637	5.46315		9.79398	5.67801	5.80403	4.83826	5.45637	5.46315	1.83941	2.00158
RS15A	-2.39053	-3.24042		5.75205	5.94166	5.82912	-3.10031	-2.83559		5.21006	5.62116	5.58251		5.68257	9.18208	5.82912	8.31037	8.45675	5.58251	-0.551948	0.45901
NUCL	-4.09826	-5.4996		5.69572	5.74696	5.88375	-4.62533	-3.09891		5.04477	5.43562	5.40085		6.18878	11.2466	5.88375	9.67009	8.53453	5.40085	-0.0954638	0.0486738
RSSA			-1.70904	5.68257	4.80346	6.10545				5.22295	5.86617	5.30421		7.18192	4.80346	7.81448	5.22295	5.86617	5.30421	1.13551	1.77105
RL29	-0.572103			5.61668	7.29118	7.24359				7.12204	7.2432	7.22277		5.51643	7.29118	7.24359	7.12204	7.2432	7.22277	-0.512267	1.2154
SMD3	-1.63496			5.54696	5.77108	5.58061	-1.69319	-2.09959	-1.97529	5.73727	5.64581	5.81005		5.4372	5.77108	5.58061	7.43047	7.7454	7.78534	-2.05744	12.6476
RS27L				5.51643	5.21685	5.04958				4.3937	4.80289	4.97412		5.31006	5.21685	5.04958	4.3937	4.80289	4.97412	0.468593	3.88723
YBOX1				5.4372	5.42925	5.53853				4.96517	5.12136	5.14735		5.30497	5.42925	5.53853	4.96517	5.12136	5.14735	0.346291	5.86212
SRSF7				5.31006	5.39587	5.04306			-4.36744	5.75883	5.11807	5.57493		5.23883	5.39587	5.04306	5.75883	5.11807	9.94237	-1.71384	1.63717
TRA2B				5.30497	5.08841	5.23227				6.03752	5.48755	5.47413		5.19515	5.08841	5.23227	6.03752	5.48755	5.47413	-0.494455	4.0501
PAIRB				5.23883	4.83147	4.93478				4.68797	5.43695	5.1257		5.17578	4.83147	4.93478	4.68797	5.43695	5.1257	-0.102866	0.534752
LA				5.19515	5.46012	5.35909		-6.03079		5.34836	5.37244	5.19039		5.18943	5.46012	5.35909	5.34836	11.4032	5.19039	-1.97778	1.36367
SMD2				5.17578	5.58207	5.61209				5.44076	5.42896	5.52531		5.10167	5.58207	5.61209	5.44076	5.42896	5.52531	-0.0330663	0.22825
H2A2C				5.18943	6.01159	5.79677				4.47617	4.98895	5.13448		5.11513	6.01159	5.79677	4.47617	4.98895	5.13448	0.774629	3.60063
RACK1				5.10167	4.6161	6.0772	-5.29328			5.47645	5.91735	4.98543		5.08761	4.6161	6.0772	10.7697	5.91735	4.98543	-1.96386	1.5274
RS27A				5.11513	5.16338	5.16884				4.98673	4.66171	4.85831		4.85931	5.16338	5.16884	4.98673	4.66171	4.85831	0.228262	2.50201
SRS10			-1.18181	5.08761	5.38013	5.12137		-2.39299		5.49176	5.32311	5.49306		7.7027	5.38013	6.30319	5.49176	7.71609	5.49306	0.228366	0.267089
HNRPC				4.85931	4.74291	4.88124				5.47504	5.13376	4.70069		6.47284	4.74291	4.88124	5.47504	5.13376	4.70069	0.2625	0.54872
HNRPU	-2.8442	-4.21002		4.8585	4.82781	5.2115	-4.93604		-4.52824	5.37591	5.29449	4.94705		4.79194	9.03783	5.2115	10.312	5.29449	9.47529	-2.01349	1.3839
H2AV	-1.66227			4.81058	4.80448	4.7549	-3.82828			5.11894	5.12799			4.76202	4.80448	4.7549	8.94722	5.12799		-2.2638	2.25162
RU17				4.79194	4.46166	4.22801		-4.08062		4.25004	4.71773	4.86131		4.7381	4.46166	4.22801	4.25004	8.79836	4.86131	-1.49398	1.49022
RU1C				4.76202	4.91957	4.66454				4.75893	3.62946	4.79203		4.71661	4.91957	4.66454	4.75893	3.62946	4.79203	0.373435	1.34928
RL39		2.8555		4.7381	4.49384	4.5247		3.19853	3.67967	9.88526	9.26449	9.82718		4.57751	1.63835	4.5247	9.88526	6.06595	6.14751	-3.78605	3.71861
H13				4.71661	4.94599	5.06433				0.711983	4.83942	4.5943		8.37525	4.94599	5.06433	0.711983	4.83942	4.5943	2.74662	2.38908
H14				4.57751	5.24741	5.25326				5.23721	5.08887	4.6979		8.48543	5.24741	5.25326	5.23721	5.08887	4.6979	1.3207	1.77379
RSMB	-3.88876	-3.09381		4.48649	3.18132	4.02821	-4.88478			4.413	4.06785	4.49535		4.34885	6.27513	4.02821	9.29778	4.06785	4.49535	-1.0696	0.766542
DDX5	-4.05647	-4.39115		4.42896	4.11856	4.31576				4.5948	4.51203	4.54124		4.35255	8.50971	4.31576	4.5948	4.51203	4.54124	1.17665	1.16626
MND1				4.34885	3.2724	2.85103				4.39437	2.85873	2.90476		4.35356	3.2724	2.85103	4.39437	2.85873	2.90476	0.106378	0.180687
TIF1B			-5.37013	4.35255	4.49625	4.53411			-5.43978	4.46706	3.9242	4.24613		4.32253	4.49625	9.90423	4.46706	3.9242	9.68591	0.215284	0.0925634
RL1D1		-3.14663		4.35356	3.8955	4.22434				4.61272	4.01658	4.67871		4.31543	7.04213	4.22434	4.61272	4.01658	4.67871	0.757969	1.09289
CBX3				4.32253	4.29609	4.36083				3.86573	3.69331	3.99146		4.31407	4.29609	4.36083	3.86573	3.69331	3.99146	0.473496	7.40601
LITD1				4.31543	4.70429	4.19616				3.91138	4.0435	4.20954		8.15668	4.70429	4.19616	3.91138	4.0435	4.20954	1.63091	1.93751
RL22L				4.31407	4.30893	4.13017				1.59266	1.94771	4.32673		10.013	4.30893	4.13017	1.59266	1.94771	4.32673	3.52835	2.55279
NPM3	-3.86444	-4.36715		4.29225	3.97334	4.04499	-3.82875	-4.42405		3.41088	2.78812	3.14917		8.76484	8.34049	4.04499	7.23964	7.21217	3.14917	1.18311	0.758214
HNRPK	-5.72487			4.28817	4.33264	4.23261				4.41903	4.37959	4.61183		9.18079	4.33264	4.23261	4.41903	4.37959	4.61183	1.4452	1.22919
U2AF2	-4.53141	-4.73556		4.23343	4.1528	4.20799				4.05065	3.94053	4.29895		3.87448	8.88836	4.20799	4.05065	3.94053	4.29895	1.56023	1.35634
DDX3X	-4.97071	-6.60195		4.21008	4.27544	4.12823		-7.3949		4.11331	4.28081	4.42193		7.44613	10.8774	4.12823	4.11331	11.6757	4.42193	0.746933	0.279225
MGN2	0.324373			4.19886	4.3522	4.70164	-1.92711			4.64999	4.5508	4.72107		4.20286	4.3522	4.70164	6.57711	4.5508	4.72107	-0.864093	1.92156
MYH10	-3.24651			4.19962	4.04671	3.74111		-8.03983		3.8728	4.18187	4.44814		7.08016	4.04671	3.74111	3.8728	12.2217	4.44814	-1.89156	0.864535
PRP19				4.20286	4.46923	4.29839				4.57325	4.27506	4.3037		5.6281	4.46923	4.29839	4.57325	4.27506	4.3037	0.414568	1.36612
HSP7C	-2.89658	-2.22997	-5.19253	4.18358	4.0073	4.28362	-4.10099	-3.51777	-3.6702	3.91423	4.20004	4.17519		4.19023	6.23727	9.47615	8.01523	7.71781	7.84538	-1.22492	1.08549
TBA1B	-1.43333	-0.274469	-2.21386	4.19477	4.42652	4.41341	-1.68754	-2.35358	-2.40752	4.07402	4.22106	4.24946		4.12476	4.70099	6.62728	5.76156	6.57464	6.65698	-1.18005	2.19546
BAF				4.19023	3.83707	3.91699				2.24367	3.46005	-1.33696		4.13306	3.83707	3.91699	2.24367	3.46005	-1.33696	2.50679	2.66903
COF1				4.12476	3.7326	3.95235				3.7525	4.35933	4.90394		4.11988	3.7326	3.95235	3.7525	4.35933	4.90394	-0.403647	1.67041
PARP1				4.13306	4.54744	4.71133				4.45004	4.42504	3.93695		8.42027	4.54744	4.71133	4.45004	4.42504	3.93695	1.62234	1.87664
ROA3		-4.64901		4.11988	4.33906	4.39309				4.71598	4.50829	4.65177		7.27827	8.98807	4.39309	4.71598	4.50829	4.65177	2.26113	2.57904
U2AF1	-4.314			4.10628	4.26909	4.00618	-5.31088	-6.01699	-5.4461	4.01663	3.46089	3.67515		3.94303	4.26909	4.00618	9.32751	9.47788	9.12125	-5.23611	18.1711
RBM39	-3.24588	-4.56378		4.03239	4.00494	4.23466		-4.15235	-3.53434	4.05883	3.68027	3.9002		3.90826	8.56872	4.23466	4.05883	7.83262	7.43454	-0.871451	0.570111
PCBP1				3.94303	3.23038	3.94308				3.95766	3.69663	3.15198		3.87449	3.23038	3.94308	3.95766	3.69663	3.15198	0.0805575	0.289294
HNRPF				3.90826	4.04961	3.79889				3.6257	3.47515	4.16734		10.4612	4.04961	3.79889	3.6257	3.47515	4.16734	2.34718	1.53851
EBP2				3.87449	3.9989	3.839				3.41744	1.64038	3.65432		3.86411	3.9989	3.839	3.41744	1.64038	3.65432	0.996623	2.37339
SSRP1	-6.59975			3.86148	3.68183	3.53198				2.9244	3.23975	3.25728		3.80021	3.68183	3.53198	2.9244	3.23975	3.25728	0.530862	5.93956
DDX21				3.86411	3.91483	3.91661				3.95566	4.02471	4.17609		3.76306	3.91483	3.91661	3.95566	4.02471	4.17609	-0.187317	3.53944
SRSF5				3.80021	4.07864	4.04063				3.6853	3.77868	3.83879		3.73161	4.07864	4.04063	3.6853	3.77868	3.83879	0.182706	2.33401
TRA2A				3.76306	3.91376	3.86208				4.35997	4.2905	4.32472		6.14515	3.91376	3.86208	4.35997	4.2905	4.32472	0.315266	0.521001
RUXF				3.73161	2.64926	2.66587				2.3748	2.32924	3.12346		3.64324	2.64926	2.66587	2.3748	2.32924	3.12346	0.376956	1.25981
NP1L1	-2.50019		-0.864797	3.64496	3.52746	3.57916				4.29308	5.38991	5.62481		3.65299	3.52746	4.44396	4.29308	5.38991	5.62481	-1.2278	3.8305
SP16H				3.64324	3.94728	3.83154				3.18684	3.22901	3.30384		3.60979	3.94728	3.83154	3.18684	3.22901	3.30384	0.556309	7.37008
GNL3				3.65299	3.76214	3.80593				3.61879	3.62809	3.47738		5.80155	3.76214	3.80593	3.61879	3.62809	3.47738	0.881788	1.93722
SRRM1				3.60979	3.52796	3.41638	-5.81043			3.58254	3.66364	3.55243		3.59228	3.52796	3.41638	9.39297	3.66364	3.55243	-2.02414	1.50103
RALY	-2.21692			3.58463	4.08795	3.99585				4.01797	4.07862	3.55436		3.54823	4.08795	3.99585	4.01797	4.07862	3.55436	-0.00630681	0.0293372
LYAR				3.59228	3.5463	3.54152				3.47886	3.5365	3.51606		3.55673	3.5463	3.54152	3.47886	3.5365	3.51606	0.0377101	3.36742
H2AY				3.54823	3.59683	3.54102				3.01511	2.70804	2.91534		3.50135	3.59683	3.54102	3.01511	2.70804	2.91534	0.666899	8.87271
RBBP4				3.55673	3.89377	3.58299				2.69292	2.69348	3.2621		3.50299	3.89377	3.58299	2.69292	2.69348	3.2621	0.777084	5.28791
DYL2				3.50135	3.87788	3.72881				3.67882		3.65249		3.4848	3.87788	3.72881	3.67882		3.65249	0.0315071	0.242455
SRRM2				3.50299	3.47747	3.56298				4.19504	4.29117	4.05147		3.46431	3.47747	3.56298	4.19504	4.29117	4.05147	-0.67764	10.1442
LC7L3				3.4848	2.74086	2.55261				2.34316	2.27546	3.0688		3.45694	2.74086	2.55261	2.34316	2.27546	3.0688	0.354329	1.32979
RUXE				3.46431	3.48428	3.08644				3.50446	3.40235	3.1853		8.93704	3.48428	3.08644	3.50446	3.40235	3.1853	1.80522	1.34544
SRSF9				3.45694	3.41062	3.4473				3.33091	3.30167	3.43697		6.23582	3.41062	3.4473	3.33091	3.30167	3.43697	1.00806	1.54637
MYO1C	-5.47353		-4.02333	3.46352	3.32415	3.09433			-4.82499	3.09805	3.35189	3.82323		6.07261	3.32415	7.11766	3.09805	3.35189	8.64822	0.472087	0.258874
TBB5	-2.76113	-2.46249	-4.53372	3.47468	3.91639	3.65905			-3.79536	3.85682	3.77894	4.05316		3.4574	6.37888	8.19277	3.85682	3.77894	7.84852	0.848255	0.551437
EF1A1	-2.62485	-0.271054		3.44776	2.66607	3.11852	-2.96772	-2.65232	-3.29124	3.33386	3.7496	3.58748		3.46292	2.93712	3.11852	6.30157	6.40192	6.87872	-3.35455	12.7907
CK098				3.4574	3.49892	3.46665				2.9354	2.61552	3.32938		3.46163	3.49892	3.46665	2.9354	2.61552	3.32938	0.515632	3.89499
IF2B1				3.46292	4.25382	4.56561				4.402	4.25042	4.09742		3.45535	4.25382	4.56561	4.402	4.25042	4.09742	-0.158351	0.583133
IF4A3			-6.54322	3.46163	3.59616	3.76783				4.05667	3.88976	3.98006		3.36542	3.59616	10.3111	4.05667	3.88976	3.98006	1.78205	1.0655
CALM				3.45535	3.07207	3.34151				1.77998	2.43443	2.92011		3.34858	3.07207	3.34151	1.77998	2.43443	2.92011	0.87588	3.99116
1433T				3.36542	3.19122	2.05318				2.63382	3.12926	3.87447		3.35511	3.19122	2.05318	2.63382	3.12926	3.87447	-0.346013	0.835543
H15				3.34858	4.16954	4.20645				4.11494	4.0858	3.30186		3.36425	4.16954	4.20645	4.11494	4.0858	3.30186	0.0792107	0.241068
EIF3A				3.35511	3.25516	3.20786				2.60217	2.82337	2.99381		3.32562	3.25516	3.20786	2.60217	2.82337	2.99381	0.456433	5.77708
BCLF1				3.36425	3.52071	3.26231				4.05716	3.30884	3.31369		3.32244	3.52071	3.26231	4.05716	3.30884	3.31369	-0.191411	0.990274
ACTS				3.32562	2.1746	1.31309				2.04996	1.35408			3.28191	2.1746	1.31309	2.04996	1.35408		0.554513	0.920213
HNRPL				3.32244	1.92748	1.9691			-5.27044	2.40851	2.05566	2.1687		3.26772	1.92748	1.9691	2.40851	2.05566	7.43914	-1.57967	1.22373
DHX9				3.28191	2.94679	3.00578		-8.76052		3.58092	3.20023	3.40164		3.26641	2.94679	3.00578	3.58092	11.9608	3.40164	-3.24144	1.66555
SAFB1				3.26772	3.23831	2.92004				2.24782	2.45774	2.94069		3.26401	3.23831	2.92004	2.24782	2.45774	2.94069	0.592037	3.96674
U5S1				3.26641	3.2381	3.3658				3.67534	3.39062	3.53091		3.2578	3.2381	3.3658	3.67534	3.39062	3.53091	-0.245058	4.18564
COR1C				3.26401	3.34943	3.04974				3.74135	3.8462	4.43846		3.26199	3.34943	3.04974	3.74135	3.8462	4.43846	-0.788286	5.14397
MYO1B		-4.09491		3.2578	2.98815	2.47327			-5.43182	2.75493	2.65041	3.274		3.26858	7.08306	2.47327	2.75493	2.65041	8.70582	-0.428753	0.201137
EIF3B				3.26199	2.75341	2.95589				1.95567	2.58266	3.09577		3.25087	2.75341	2.95589	1.95567	2.58266	3.09577	0.442025	1.8023
TPM3				3.26858	2.98833	2.73408				3.24855	3.22336	3.36407		3.07013	2.98833	2.73408	3.24855	3.22336	3.36407	-0.347814	4.87081
EIF3L				3.25087	3.54132	3.55782				2.34549	3.00108	3.13369		3.18917	3.54132	3.55782	2.34549	3.00108	3.13369	0.602686	3.4612
G3P	0.190527	0.157807	-1.68913	3.26065	3.35525	3.28844	-0.839458	-0.929536	-0.590723	2.98836	2.65707	3.6823		3.17913	3.19745	4.97757	3.82782	3.58661	4.27302	-0.1111	0.203454
EIF3F				3.18917	2.90074	3.07351				2.13945	2.07459	3.12124		3.17842	2.90074	3.07351	2.13945	2.07459	3.12124	0.605797	2.67286
TR150				3.17913	3.59149	3.46916				3.41102	3.25315	3.71202		3.18972	3.59149	3.46916	3.41102	3.25315	3.71202	-0.0419445	0.274395
CG050				3.17842	2.20071	2.52651				1.8354	0.838938	1.28836		3.15887	2.20071	2.52651	1.8354	0.838938	1.28836	1.3078	4.99147
EIF3M				3.18972	3.14563	3.24217				3.12744	2.71549	3.22165		3.1037	3.14563	3.24217	3.12744	2.71549	3.22165	0.142306	1.23115
LIMA1				3.15887	2.43958	2.06581				2.41379	2.58207	3.21993		3.09352	2.43958	2.06581	2.41379	2.58207	3.21993	-0.205628	0.680127
SF3B1		-7.57298		3.1037	2.8957	3.1171			-7.92502	3.63172	3.13666	3.24993		3.09474	10.4687	3.1171	3.63172	3.13666	11.175	-0.420936	0.132941
PP1G				3.09352	3.15465	1.66549	-3.93009	-3.33302	-2.58898	1.83131	2.78351	2.82479		2.99804	3.15465	1.66549	5.76139	6.11653	5.41377	-3.15784	8.13239
ACINU				3.09474	2.86244	3.07674		-5.89671		3.53269	3.11567	2.83692		6.99278	2.86244	3.07674	3.53269	9.01238	2.83692	-0.816679	0.419394
PELP1				2.99804	3.04473	2.808				2.04029	1.23437	1.35328		6.99745	3.04473	2.808	2.04029	1.23437	1.35328	2.74075	3.07916
PR40A	-3.98644			3.00634	3.19114	3.22861				3.11608	3.01789	3.2002		8.96344	3.19114	3.22861	3.11608	3.01789	3.2002	2.01634	1.50396
ADT1	-3.99225	-2.55017		3.0052	2.60825	2.75191	-3.75629	-3.1625	-1.76131	2.9533	3.03318	2.46685		2.94411	5.15842	2.75191	6.70959	6.19567	4.22816	-2.09299	3.0016
MBB1A	-5.98885			2.97459	3.34745	3.46668				3.9134	3.4705	2.95342		2.89847	3.34745	3.46668	3.9134	3.4705	2.95342	-0.208239	0.839679
NHP2				2.94411	3.01051	2.9328				2.66937	2.84013	3.20266		2.905	3.01051	2.9328	2.66937	2.84013	3.20266	0.0453863	0.33787
EIF3D				2.89847	1.68256	2.92316				2.46998	2.39318	2.87315		2.89894	1.68256	2.92316	2.46998	2.39318	2.87315	-0.077217	0.204293
SF3B3				2.905	2.42476	3.11777				3.00435	2.61134	1.93684		2.89089	2.42476	3.11777	3.00435	2.61134	1.93684	0.293635	1.07505
EIF3K				2.89894	3.31129	2.88524				2.26461	1.93103	1.79681		2.89522	3.31129	2.88524	2.26461	1.93103	1.79681	1.0331	7.28955
EIF3I				2.89089	2.66256	2.50523				2.02643	2.4512	2.32487		2.89349	2.66256	2.50523	2.02643	2.4512	2.32487	0.419596	3.87753
U520				2.89522	2.59526	2.98844				3.51288	3.20006	3.14309		2.87149	2.59526	2.98844	3.51288	3.20006	3.14309	-0.466949	4.43317
TSR1				2.89349	2.83458	2.70711				1.31474	2.20496	2.69461		2.88212	2.83458	2.70711	1.31474	2.20496	2.69461	0.736497	2.78777
IF4B				2.87149	2.61326	2.72858				2.52209	2.9216	2.60535		2.86638	2.61326	2.72858	2.52209	2.9216	2.60535	0.0530608	0.458786
PININ				2.88212	2.59586	2.84925				3.56826	2.94682	3.05702		2.80803	2.59586	2.84925	3.56826	2.94682	3.05702	-0.439654	3.31053
SAP18				2.86638	5.1391	4.37955			-2.50456	5.18779	5.07076	3.9326		2.79781	5.1391	4.37955	5.18779	5.07076	6.43716	-1.45975	2.75288
MYH14				2.80803	2.41449	2.3059				2.43859	2.3351	-1.4467		2.80108	2.41449	2.3059	2.43859	2.3351	-1.4467	1.39816	1.56319
LTV1				2.79781	1.44711	1.48029						0.729835		2.80396	1.44711	1.48029			0.729835	1.18062	#DIV/0!
SF3B6				2.80108	2.91106	3.35063				3.53847	3.80266	2.40382		2.80023	2.91106	3.35063	3.53847	3.80266	2.40382	-0.227677	0.627807
CAZA1				2.80396	2.34714	2.49639				2.14189	2.53938	2.53762		2.78289	2.34714	2.49639	2.14189	2.53938	2.53762	0.135844	0.996766
WDR61		-0.185019	0.175628	2.80023	3.22665	2.99183	0.657887	-0.306811	0.656891	4.8267	3.91256	3.48394		2.77998	3.41166	2.8162	4.16882	4.21937	2.82705	-0.735797	2.21792
IF6				2.78289	2.25211	2.04784				1.37273	1.38338	1.96418		2.74864	2.25211	2.04784	1.37273	1.38338	1.96418	0.776098	4.23652
ZCH10				2.77998	2.95423	2.77396				3.03296	2.87257	3.42142		4.35021	2.95423	2.77396	3.03296	2.87257	3.42142	0.25048	0.604648
PGAM5				2.74864	2.70197	2.62342				3.32038	2.83791	3.12537		2.69121	2.70197	2.62342	3.32038	2.83791	3.12537	-0.422354	4.60136
ADT2	-1.65596	-1.59682		2.69425	3.31966	3.19165				4.1785	2.91983	3.0511		2.68248	4.91648	3.19165	4.1785	2.91983	3.0511	0.213726	0.323833
YBOX3				2.69121	0.381927	1.36576						1.82374		2.66514	0.381927	1.36576			1.82374	-0.352795	#DIV/0!
PTBP1				2.68248	2.26365	2.23553				1.2967	2.37608	2.80409		2.67553	2.26365	2.23553	1.2967	2.37608	2.80409	0.232614	0.628291
PUM3				2.66514	2.90479	2.8048		-5.41112		2.90363	2.58224	2.19878		2.66753	2.90479	2.8048	2.90363	7.99336	2.19878	-1.57288	1.19176
EIF3H				2.67553	2.59677	2.4303				2.02181	2.60574	2.24988		2.67264	2.59677	2.4303	2.02181	2.60574	2.24988	0.274091	2.24261
LC7L2				2.66753	3.7407	3.98996				3.90027	3.81	3.75892		2.66959	3.7407	3.98996	3.90027	3.81	3.75892	-0.356314	1.21466
ACTG				2.67264	1.8035	1.16266				1.43196	1.11549	1.90396		2.67842	1.8035	1.16266	1.43196	1.11549	1.90396	0.397724	1.09821
HNRH1				2.66959	2.26865	2.3434				2.07985	2.42901	2.54607		2.67454	2.26865	2.3434	2.07985	2.42901	2.54607	0.0772185	0.511261
ILF2				2.67842	2.8658	2.6979				3.0314	3.1001	2.65414		2.65405	2.8658	2.6979	3.0314	3.1001	2.65414	-0.189298	1.81895
PRDX4		-4.87549	-5.27852	2.67454	1.83622	1.85371		-5.90958	-5.83285	2.1611	1.39599	2.62041		2.55619	6.71171	7.13223	2.1611	7.30557	8.45326	-0.5066	0.243554
DNM3L		-4.93352		2.65405	2.67524	2.35149			-4.53982	2.4153	0.9718	2.57071		2.54689	7.60875	2.35149	2.4153	0.9718	7.11054	0.669832	0.314383
LUC7L				2.55619	2.33449	2.67444				3.06223	2.88814	2.46077		2.55569	2.33449	2.67444	3.06223	2.88814	2.46077	-0.28217	2.05954
BRX1				2.54689	2.97824	1.94136				3.84859	2.28828	3.57654		2.54298	2.97824	1.94136	3.84859	2.28828	3.57654	-0.750276	1.96242
RNPS1				2.55569	2.5063	2.50066				3.38801	3.0647	2.4863		2.55387	2.5063	2.50066	3.38801	3.0647	2.4863	-0.459395	2.66964
EIF3C				2.54298	2.35288	2.66168				2.20733	1.8271	2.19406		2.56287	2.35288	2.66168	2.20733	1.8271	2.19406	0.449646	4.52252
IMA1				2.55387	2.83377	1.94592				1.75782	1.39107	2.51779		2.51396	2.83377	1.94592	1.75782	1.39107	2.51779	0.542324	1.90275
ABCF2				2.56287	2.04594	2.13006				1.05166	1.56676	2.78152		2.5147	2.04594	2.13006	1.05166	1.56676	2.78152	0.430253	1.10602
SRPK1				2.51396	3.04052	2.53784				2.85465	2.02033	2.07253		3.85076	3.04052	2.53784	2.85465	2.02033	2.07253	0.827204	2.71864
KCTD5				2.5147	2.82804	2.4637				3.55935	3.81836	3.8345		2.51622	2.82804	2.4637	3.55935	3.81836	3.8345	-1.13475	9.45973
RBM8A	-1.34408	-0.888977	-1.70158	2.50668	1.95351	2.19662	-1.85921	-2.05301		2.74594	1.76756	2.28333		2.50955	2.84249	3.89819	4.60514	3.82058	2.28333	-0.486271	0.795445
PABP2				2.51622	2.24733	2.60747				3.07445	2.57851	2.10781		2.51619	2.24733	2.60747	3.07445	2.57851	2.10781	-0.129927	0.542498
PRP8				2.50955	2.5545	2.47761				2.77071	2.77612	2.70936		2.50894	2.5545	2.47761	2.77071	2.77612	2.70936	-0.238377	9.35664
EIF3E				2.51619	3.53288	3.14954				2.23161	2.85475	3.71418		2.44475	3.53288	3.14954	2.23161	2.85475	3.71418	0.108878	0.236711
SMCA5				2.50894	2.40687	2.54578				2.03338	1.49104	2.37142		2.45138	2.40687	2.54578	2.03338	1.49104	2.37142	0.50273	3.0007
UHRF1				2.44475	2.45076	2.25989				1.95651	1.70721	1.96593		2.46128	2.45076	2.25989	1.95651	1.70721	1.96593	0.514094	6.85587
DIM1				2.45138	0.568976						0.772055			2.46571	0.568976			0.772055		0.745288	#DIV/0!
DHX15				2.46128	1.89363	1.95104				2.90079	2.84	2.9023		2.4901	1.89363	1.95104	2.90079	2.84	2.9023	-0.769439	5.98613
PRP4				2.46571	2.15459	2.32667				2.25073	2.37559	1.80269		2.44565	2.15459	2.32667	2.25073	2.37559	1.80269	0.165967	1.18733
SHAN1	-0.0408619	1.81717	-0.349641	2.44923	-0.0450902	0.198846	-0.298563		0.73272	2.8932	1.35558	1.33571		2.45655	-1.86226	0.548487	3.19176	1.35558	0.602988	-1.33585	1.27212
RFC2				2.44565	2.49899	2.71069				1.14157	2.85589	1.77532		2.41237	2.49899	2.71069	1.14157	2.85589	1.77532	0.616421	1.7764
PDIP3		-4.46006		2.45655	2.53552	2.39731	-4.23004		-3.04857	2.72076	2.57481	2.99742		2.42285	6.99558	2.39731	6.9508	2.57481	6.04599	-1.25195	0.809631
SNR40				2.41237	2.15834	2.82309				2.33938	2.3061	2.57565		2.42655	2.15834	2.82309	2.33938	2.3061	2.57565	0.0622821	0.353926
CDC5L				2.42285	2.23259	2.28759				2.70511	2.26652	2.44675		2.40618	2.23259	2.28759	2.70511	2.26652	2.44675	-0.164004	1.74681
DDX17				2.42655	3.04899	2.63728				2.54208	2.76963	2.35327		2.41146	3.04899	2.63728	2.54208	2.76963	2.35327	0.14425	0.858823
THOC2				2.40618	2.09783	2.18135				2.35885	1.7746	2.21068		2.39522	2.09783	2.18135	2.35885	1.7746	2.21068	0.110092	0.724776
DREB				2.41146	1.85988	1.6082				1.37348	1.53542	2.73314		11.2306	1.85988	1.6082	1.37348	1.53542	2.73314	3.01888	1.32822
RUVB1				2.39522	2.22021	2.29937				2.12058	1.77168	1.72782		2.39068	2.22021	2.29937	2.12058	1.77168	1.72782	0.430062	4.9498
PRC2B	-8.8483			2.38231	1.39991	0.934045				1.08876	0.354448	1.21503		2.3664	1.39991	0.934045	1.08876	0.354448	1.21503	0.680705	2.02938
SRP14				2.39068	0.374928	2.06596				2.0808	2.44794	1.29724		2.34146	0.374928	2.06596	2.0808	2.44794	1.29724	-0.347876	0.629734
SMU1				2.3664	2.23499	2.40461				2.93634	2.56666	2.92138		2.30536	2.23499	2.40461	2.93634	2.56666	2.92138	-0.493141	5.68563
SNW1				2.34146	2.12233	2.17605				3.30029	2.43344	2.66296		5.67995	2.12233	2.17605	3.30029	2.43344	2.66296	0.527211	0.547129
RBM25				2.30536	2.48792	2.24379				2.44161	2.14392	2.71297		2.24263	2.48792	2.24379	2.44161	2.14392	2.71297	-0.108052	0.76725
HNRPM	-3.42116	-2.69805	-3.056	2.25879	2.13321	1.7785	-3.21288	-3.57426		2.38888	1.84765	2.469		2.24906	4.83126	4.8345	5.60175	5.42191	2.469	-0.525951	0.487978
ZN622				2.24263	1.5133	2.34628				2.31601	2.30464	2.50902		2.25784	1.5133	2.34628	2.31601	2.30464	2.50902	-0.337415	1.82053
CBX5				2.24906	2.74726	2.57714				2.39193	2.32512	2.26948		2.26068	2.74726	2.57714	2.39193	2.32512	2.26948	0.199519	2.02361
FUS				2.25784	3.20622	2.86373				2.54784	2.99285	3.31712		2.25336	3.20622	2.86373	2.54784	2.99285	3.31712	-0.17816	0.6352
SYF2				2.26068	1.78388	2.20196				1.68923	2.0405	2.13581		2.2337	1.78388	2.20196	1.68923	2.0405	2.13581	0.118	0.774974
RCC2				2.25336	1.77334	2.13035				1.02838	1.73729	1.75862		2.22385	1.77334	2.13035	1.02838	1.73729	1.75862	0.534413	2.99607
RRP12				2.2337	2.52729	1.83876				1.69497	1.51117	1.93739		2.23213	2.52729	1.83876	1.69497	1.51117	1.93739	0.484882	3.21693
CPSF5				2.22385	2.29237	2.13595				2.38501	2.3222	2.34596		2.20158	2.29237	2.13595	2.38501	2.3222	2.34596	-0.14109	4.48072
LYRIC				2.23213	0.852035	1.71221				0.574776	1.72285	1.9949		2.21134	0.852035	1.71221	0.574776	1.72285	1.9949	0.16102	0.325336
PNO1				2.20158	2.82391	2.17383				1.85789	1.97968	2.58138		2.15176	2.82391	2.17383	1.85789	1.97968	2.58138	0.24352	1.05478
CSK21				2.21134	2.07667	1.3494				0.437052	0.662291	1.21384		2.14704	2.07667	1.3494	0.437052	0.662291	1.21384	1.08664	4.87059
SYAM		-7.99095		2.15176	2.36226	2.59265				1.20619	2.99137	2.03709		2.0967	10.3532	2.59265	1.20619	2.99137	2.03709	2.93597	1.54977
SMRC1				2.14704	2.06968	2.05363				2.27756	1.47492	1.28892		2.09337	2.06968	2.05363	2.27756	1.47492	1.28892	0.39176	1.90833
ABEC3				2.0967	1.66582	1.81136				1.4467	2.12125	1.90959		2.51343	1.66582	1.81136	1.4467	2.12125	1.90959	0.171019	0.665458
PPIG				2.09337	1.99264	1.79825				2.54782	1.99025	1.8259		2.03933	1.99264	1.79825	2.54782	1.99025	1.8259	-0.177915	1.04862
SSF1	-0.436073		-0.319581	2.07736	0.693355				0.202656	2.91761				2.03824	0.693355	#VALUE!	2.91761		#VALUE!	#VALUE!	#VALUE!
FL2D		-3.89344		2.03933	1.78939				-4.68973		0.392659	2.32584		2.04591	5.68283			0.392659	7.01558	0.160255	0.0439154
PHF5A				2.03824	3.11013	3.59099				3.42087	3.38956	2.24853		2.05528	3.11013	3.59099	3.42087	3.38956	2.24853	-0.100851	0.194787
NOP56			-3.51227	2.04591	0.680714	1.6846		-2.95052		1.79178	1.79666	2.85827		2.04382	0.680714	5.19687	1.79178	4.74718	2.85827	-0.491941	0.371875
NSUN2				2.05528	1.85854	1.92764				1.75059	1.86756	1.79711		2.03366	1.85854	1.92764	1.75059	1.86756	1.79711	0.134858	3.43595
PTPRB				2.04382	1.69332	1.58329				-3.15648	1.8545			2.02374	1.69332	1.58329	-3.15648	1.8545		2.41777	1.79731
ZCH18				2.03366	2.85817	3.33132				3.08801	2.64976	2.63854		2.00202	2.85817	3.33132	3.08801	2.64976	2.63854	-0.0615974	0.168924
RU2A				2.02374	2.62841	3.60342				3.57523	3.15824	3.29107		1.99764	2.62841	3.60342	3.57523	3.15824	3.29107	-0.598355	1.8204
DDX3Y				2.00202	1.40828	2.04613				1.88472	1.50125	2.16544		1.98629	1.40828	2.04613	1.88472	1.50125	2.16544	-0.0368983	0.149548
THOC1				1.99764	1.85582	2.37817				2.03366	2.6779	2.07158		1.99329	1.85582	2.37817	2.03366	2.6779	2.07158	-0.185286	0.952885
DHX30				1.98629	1.51458	1.57621				1.87527	1.5003	1.64885		1.99461	1.51458	1.57621	1.87527	1.5003	1.64885	0.0203252	0.122994
CDKA1				1.99329	1.61885	1.81898					1.37407	1.07263		4.75517	1.61885	1.81898		1.37407	1.07263	1.50765	1.58084
PSIP1				1.99461	1.11366	1.55361				0.952324	1.60518	0.631806		1.99753	1.11366	1.55361	0.952324	1.60518	0.631806	0.49183	1.89418
LIN41	-2.76012	-3.35471	-2.80558	1.99505	2.22843	2.20126	-2.78385	-3.23682		2.27783	1.88674	2.31399		1.99345	5.58314	5.00684	5.06167	5.12356	2.31399	0.0280684	0.0211251
SENP3				1.99753	2.75907	2.11926				1.29896	-0.152869	0.493647		1.98793	2.75907	2.11926	1.29896	-0.152869	0.493647	1.74218	5.46843
EF2		-7.9424		1.99345	1.4025	1.23724				0.489315	0.933927	1.03934		1.96698	9.34489	1.23724	0.489315	0.933927	1.03934	3.36218	1.91697
P5CR2				1.98793	1.83178	1.4256				1.44902	0.816994	0.802339		1.97326	1.83178	1.4256	1.44902	0.816994	0.802339	0.720765	4.17713
MBD3				1.96698	2.01786	1.45306				0.0397686	0.345848	0.863534		1.98107	2.01786	1.45306	0.0397686	0.345848	0.863534	1.40095	6.68499
DKC1				1.97326	1.66899	2.09306				2.51981	1.93145	1.46778		1.98172	1.66899	2.09306	2.51981	1.93145	1.46778	-0.0584282	0.204243
HM20A		-5.17322		1.98107	2.54148	2.34705				-0.366612	-0.250642	-0.198434		1.99141	7.71471	2.34705	-0.366612	-0.250642	-0.198434	4.28962	3.61749
SRSF4				1.98172	2.55138	2.44567					1.40971	2.42356		4.35117	2.55138	2.44567		1.40971	2.42356	1.19943	1.90223
PRP4B				1.99141	1.26813	1.45302				1.43186	0.955028	1.42964		1.98458	1.26813	1.45302	1.43186	0.955028	1.42964	0.296404	1.60343
NCBP1	-2.36307	-2.46471	-2.11532	1.9881	1.83609	1.3049	-1.97828	-2.92448		2.35886	0.737382	2.20508		3.17133	4.30081	3.42022	4.33714	3.66186	2.20508	0.229425	0.386848
BYST				1.98458	1.64071	0.227759				0.147042	0.898629	1.8546		1.99254	1.64071	0.227759	0.147042	0.898629	1.8546	0.320247	0.54772
GRN	-1.1845	-0.398802	-0.940169	1.98683	0.792707	0.140617	-3.41655	-2.63713			3.36906	2.12337		0.244277	1.19151	1.08079	#VALUE!	6.0062	2.12337	#VALUE!	#VALUE!
DNJC9				1.99254	1.25636	1.93191				1.51146	1.25355	0.788554		1.98878	1.25636	1.93191	1.51146	1.25355	0.788554	0.541161	2.6231
KV5A9	1.75529	2.10073	1.446	1.99957			1.39535	1.07493	1.75316			0.901212		8.59851	#VALUE!	#VALUE!	#VALUE!	#VALUE!	-0.851945	#VALUE!	#VALUE!
HS71L				1.98878	1.74245	2.01045					1.27385	1.84327		1.95895	1.74245	2.01045		1.27385	1.84327	0.345392	2.05048
HNRPQ	-6.6409	-5.89809	-5.50435	1.95761	1.88151	2.76819				2.35649	2.48456	2.66303		1.96932	7.77959	8.27255	2.35649	2.48456	2.66303	3.5058	2.65664
HNRL2				1.95895	1.66936	0.969917				1.04172	0.254441	2.12189		1.96202	1.66936	0.969917	1.04172	0.254441	2.12189	0.394417	0.844507
PRPF3				1.96932	2.1289	1.9351				2.40979	1.03738	2.23826		1.97192	2.1289	1.9351	2.40979	1.03738	2.23826	0.116831	0.318518
FBRL				1.96202	1.47486	2.49227				2.80396	2.97434	2.79747		1.97085	1.47486	2.49227	2.80396	2.97434	2.79747	-0.879266	4.55572
SKP1				1.97192	1.42204	1.48467				1.50655	1.74031	1.81811		1.98278	1.42204	1.48467	1.50655	1.74031	1.81811	-0.0584877	0.349048
PABP1				1.97085	0.889093	0.547543					0.439176	-0.0822512		1.98015	0.889093	0.547543		0.439176	-0.0822512	0.960465	2.3049
NOP58				1.98278	1.57515	1.29239	-2.92983		-4.35814	1.05493	1.61664	0.890297		6.88938	1.57515	1.29239	3.98476	1.61664	5.24844	-0.364306	0.198875
RED				1.98015	2.06329	2.19186				2.03836	1.64511	2.19208		1.99094	2.06329	2.19186	2.03836	1.64511	2.19208	0.123514	0.957298
COR2B	-4.90967	-5.85737		1.97971	0.946216	0.275184	-4.64492			1.18381	0.68321	1.70199		1.92006	6.80358	0.275184	5.82873	0.68321	1.70199	0.261632	0.116993
CTCF				1.99094	1.24061	1.57746					1.55618			1.8406	1.24061	1.57746		1.55618		-0.00328705	#DIV/0!
PARP2				1.92006	2.47558	2.1487				1.22601	0.93465	1.09306		1.73794	2.47558	2.1487	1.22601	0.93465	1.09306	1.03616	6.54812
TBA1A				1.8406	1.30576	1.05108				1.37158	0.325998	0.726015		1.72994	1.30576	1.05108	1.37158	0.325998	0.726015	0.554396	2.30971
RIOK2				1.73794	1.15324	1.65509				0.093763		0.734336		-2.05563	1.15324	1.65509	0.093763		0.734336	-0.163151	0.118306
TEX10				1.72994	1.50208	1.68408				0.124108	-0.0723962	-0.415733		1.71763	1.50208	1.68408	0.124108	-0.0723962	-0.415733	1.75594	10.9331
SC61G	3.7942		3.40898	1.73856	6.96526	7.20331		4.76403			7.03978	6.37198		1.72752	6.96526	3.79433		2.27575	6.37198	-0.161493	0.0704262
PR38B				1.71763	1.71255	0.641632				0.315337	0.720925	0.765373		1.72281	1.71255	0.641632	0.315337	0.720925	0.765373	0.758455	3.04662
SMCA4				1.72752	0.787973	0.482709				0.43304	0.389744	0.505429		1.72815	0.787973	0.482709	0.43304	0.389744	0.505429	0.556873	2.23106
MBTP1				1.72281	0.255062	0.475155				0.358776		0.596754		1.68934	0.255062	0.475155	0.358776		0.596754	0.328753	0.708516
IF5A2				1.72815	0.768235	0.968641				1.00221	1.20503	1.55745		1.69764	0.768235	0.968641	1.00221	1.20503	1.55745	-0.110059	0.410443
RMXL1				1.68934	1.58619	1.5098				2.2028	1.71179	1.52039		1.68358	1.58619	1.5098	2.2028	1.71179	1.52039	-0.218471	1.49162
TOP2A				1.69764	1.0648	1.90014				0.749539	0.949184	1.09602		1.67934	1.0648	1.90014	0.749539	0.949184	1.09602	0.616511	3.57445
RBM14				1.68358	1.18442	0.704514				1.37506	0.838952			1.69032	1.18442	0.704514	1.37506	0.838952		0.0860771	0.234269
NACA				1.67934								1.17206		1.69712					1.17206	0.525057	#DIV/0!
NOP2				1.69032	1.4575	1.66449				1.74473	2.02599	1.86057		1.70745	1.4575	1.66449	1.74473	2.02599	1.86057	-0.267283	3.7178
MYO1E				1.69712	1.19839	1.20096				1.0284	1.81172	2.24857		1.66852	1.19839	1.20096	1.0284	1.81172	2.24857	-0.340273	1.21156
CBX1				1.70745	3.26641	3.61828				0.23883	0.631677	0.0172569		1.65416	3.26641	3.61828	0.23883	0.631677	0.0172569	2.55036	6.00574
RFC1				1.66852	2.17984	2.25534				2.32168	2.61354	2.14593		7.6243	2.17984	2.25534	2.32168	2.61354	2.14593	1.65944	1.28445
NOL9				1.65416	1.6793	1.36564						-0.92396		1.65284	1.6793	1.36564			-0.92396	2.48989	#DIV/0!
ROA0	-5.96367			1.66064	1.67574	1.69857					2.05684	1.3568		1.66167	1.67574	1.69857		2.05684	1.3568	-0.0281589	0.118768
THOC6				1.65284	1.77563	1.92887				1.47949	0.823557	1.5991		1.67143	1.77563	1.92887	1.47949	0.823557	1.5991	0.491262	3.01785
DNM3A				1.66167	1.32216	0.938054				0.803234	-0.316598	1.0843		1.68215	1.32216	0.938054	0.803234	-0.316598	1.0843	0.790473	2.52211
VIGLN				1.67143	1.80202	1.52235				0.129218	1.84179	1.10746		8.50183	1.80202	1.52235	0.129218	1.84179	1.10746	2.91591	1.83767
ERR1				1.68215	1.18057	0.257198				0.999221	0.118423	0.622833		1.61505	1.18057	0.257198	0.999221	0.118423	0.622833	0.437449	1.28991
TDH	-6.8848		-7.15909	1.61704	0.818237	0.37435				-0.0910598	0.881248	0.897082		1.62364	0.818237	7.53344	-0.0910598	0.881248	0.897082	2.76268	1.90693
LRRF2				1.61505	1.9143					0.783907	0.362341			1.62909	1.9143		0.783907	0.362341		1.19857	4.56501
FXR1				1.62364	1.72235	0.935203				-0.333899	1.99948	0.597637		1.62852	1.72235	0.935203	-0.333899	1.99948	0.597637	0.674283	1.31007
TMOD3				1.62909	-0.113178	0.145751				0.708182	1.22475	1.34052		1.62239	-0.113178	0.145751	0.708182	1.22475	1.34052	-0.539496	1.31896
RBM34				1.62852	0.914337	0.888186						0.897955		1.63496	0.914337	0.888186			0.897955	0.247871	#DIV/0!
WDR5				1.62239	2.77341	2.89851				1.94537	2.5402	1.03398		-1.90859	2.77341	2.89851	1.94537	2.5402	1.03398	-0.585407	0.435616
RFC3				1.63496	1.93927	2.26917				1.83414	2.01478	1.78014		1.64083	1.93927	2.26917	1.83414	2.01478	1.78014	0.0734037	0.462958
KV3AI	3.5545	3.76303	3.45486	1.64591		2.39249	3.36965	2.52292	3.56562	3.07993	2.35856			1.64152	#VALUE!	-1.06237	-0.289714	-0.16436	#VALUE!	#VALUE!	#VALUE!
NIP7		-3.31723	-2.12843	1.64083	1.33687	1.13335		-3.32099	-2.9704	0.640861	0.821255	1.90806		1.63217	4.6541	3.26178	0.640861	4.14225	4.87846	-0.0378373	0.0262773
TBA1C				1.64152	1.12742	1.3695				1.22527	1.03388	0.664079		1.64238	1.12742	1.3695	1.22527	1.03388	0.664079	0.405356	2.81802
AQR				1.63217	1.04609	0.732337				1.19815	0.814511	0.513541		1.64616	1.04609	0.732337	1.19815	0.814511	0.513541	0.299458	1.25229
FIP1				1.64238	0.204693	1.06049				1.83039	0.838747	1.17835		1.64425	0.204693	1.06049	1.83039	0.838747	1.17835	-0.312687	0.804757
GNL3L				1.64616	0.240251	-0.280029					-0.312787	0.849717		1.65456	0.240251	-0.280029		-0.312787	0.849717	0.269796	0.367733
RPAB3				1.64425	1.1989	2.44335				0.820173	1.47814	2.01385		1.66803	1.1989	2.44335	0.820173	1.47814	2.01385	0.332706	0.881466
SR140				1.65456	1.96555	1.71399				2.12166	1.83724	2.87906		1.63954	1.96555	1.71399	2.12166	1.83724	2.87906	-0.506286	2.35424
THOC5				1.66803	0.593908	1.32162				1.33724	1.62763	2.04873		1.64568	0.593908	1.32162	1.33724	1.62763	2.04873	-0.484132	1.91897
CHERP				1.63954	0.613155	0.160174				2.0087		1.46412		1.64375	0.613155	0.160174	2.0087		1.46412	-0.930717	2.18584
CHD4				1.64568	1.65723	1.33962				0.780111	0.499426	0.736041		1.6545	1.65723	1.33962	0.780111	0.499426	0.736041	0.878589	8.37137
1433Z				1.64375	0.0543661	1.10547				0.259408	1.00996	1.13584		1.66915	0.0543661	1.10547	0.259408	1.00996	1.13584	0.141261	0.306118
TAF1C				1.6545						0.378258		-0.26586		1.68107			0.378258		-0.26586	1.62487	#DIV/0!
MYO5A				1.66915	0.503612	0.528497				-0.214494	0.066702	1.12048		1.67008	0.503612	0.528497	-0.214494	0.066702	1.12048	0.576498	1.4695
DDX18				1.68107	-0.291372	-0.641998				-0.323902	0.0535512	0.391653		1.54063	-0.291372	-0.641998	-0.323902	0.0535512	0.391653	0.161987	0.268557
PRP31				1.67008	0.915561	1.24556				0.82124	1.00078	0.194558		1.54264	0.915561	1.24556	0.82124	1.00078	0.194558	0.562395	2.85561
ECD				1.54063	0.733883	-0.751498				-0.405355	1.2489	1.0519		1.48075	0.733883	-0.751498	-0.405355	1.2489	1.0519	-0.144104	0.197855
PK1IP				1.54264	2.09191	2.08267				1.93591	1.27517	1.55466		1.43572	2.09191	2.08267	1.93591	1.27517	1.55466	0.281523	1.37337
RBM22				1.48075	0.858276	3.08915				3.76669	2.91104	0.633043		1.41481	0.858276	3.08915	3.76669	2.91104	0.633043	-0.649508	0.730781
ROA2				1.43572	0.842214	0.691138				1.31585		1.86474		1.39564	0.842214	0.691138	1.31585		1.86474	-0.613965	2.53778
FBX30				1.41481	0.189848	0.937534				0.235915	-0.300667	-0.309986		1.40271	0.189848	0.937534	0.235915	-0.300667	-0.309986	0.968277	3.81323
IF2B3				1.39564	0.908839	0.639459				1.49123	1.15306	0.761098		1.3915	0.908839	0.639459	1.49123	1.15306	0.761098	-0.155198	0.649682
RFC5				1.40271	1.1473	1.38262				1.82225	1.43833	1.58099		1.38685	1.1473	1.38262	1.82225	1.43833	1.58099	-0.30827	3.50771
RFC4				1.3915	0.691379	1.27317								1.39692	0.691379	1.27317				#DIV/0!	#DIV/0!
SPG7				1.38685	1.35436	1.25933				1.14948	1.04588	1.51726		1.38991	1.35436	1.25933	1.14948	1.04588	1.51726	0.0969914	0.866087
CCNL1				1.39692	-2.07523	-0.18594				-0.0534175		0.426295		1.39888	-2.07523	-0.18594	-0.0534175		0.426295	-0.473867	0.431912
RU2B				1.38991	1.2849	1.35892				1.51607	2.60733	1.88617		1.36909	1.2849	1.35892	1.51607	2.60733	1.88617	-0.665557	3.22143
UBP10				1.39888	1.05221	0.587035				-0.0223783	-0.656344	-0.124436		1.35861	1.05221	0.587035	-0.0223783	-0.656344	-0.124436	1.26701	6.24622
IPO9				1.36909	0.286236	0.623653				2.58533	3.58771	3.34166		1.27695	0.286236	0.623653	2.58533	3.58771	3.34166	-2.44262	7.85734
BAZ2A				1.35861	0.981971	-1.23337				-1.39668	-0.533025	0.757959		1.28271	0.981971	-1.23337	-1.39668	-0.533025	0.757959	0.734351	0.977988
LARP1				1.27695	0.756102	0.485205				0.720937	0.409866	0.373393		1.28472	0.756102	0.485205	0.720937	0.409866	0.373393	0.340611	1.94688
MY18A				1.28271	0.265592	-0.646161				0.181608	-1.16084	1.50506		1.29702	0.265592	-0.646161	0.181608	-1.16084	1.50506	0.130207	0.155412
TRIPC				1.28472	0.964582	0.206965				0.0352663	0.407251	0.520091		1.30007	0.964582	0.206965	0.0352663	0.407251	0.520091	0.503004	2.12411
DNJA2				1.29702	0.080204	0.0654467				-0.557749	-0.368553	-0.826176		1.28078	0.080204	0.0654467	-0.557749	-0.368553	-0.826176	1.05964	3.90344
RRS1				1.30007	-0.272243	-0.470021				-1.20607	-0.639293	0.121758		1.23475	-0.272243	-0.470021	-1.20607	-0.639293	0.121758	0.738695	1.61367
SLTM				1.28078	0.507002	0.636669				1.09183	0.204977	0.800503		1.23941	0.507002	0.636669	1.09183	0.204977	0.800503	0.0952552	0.328883
MATR3				1.23475	1.21614	0.542721				0.665633	0.419007	0.569338		1.22043	1.21614	0.542721	0.665633	0.419007	0.569338	0.441769	2.88934
THOC4				1.23941	1.4119	3.38374				1.64749	2.90796	1.02977		1.22289	1.4119	3.38374	1.64749	2.90796	1.02977	0.144432	0.187305
SRRT				1.22043	1.88585	1.81447				0.885653	0.802845	1.68057		1.21409	1.88585	1.81447	0.885653	0.802845	1.68057	0.515116	2.20536
APC7				1.22289		0.242257					2.21933	1.91829		1.22513		0.242257		2.21933	1.91829	-1.33511	3.03832
GKAP1				1.21409	0.206539	0.720011				0.256348	0.610231	0.527275		1.23813	0.206539	0.720011	0.256348	0.610231	0.527275	0.256941	1.11313
ZC3H4				1.22513	-0.695418	-0.36797				-0.555657	-0.324608	0.341017		1.24495	-0.695418	-0.36797	-0.555657	-0.324608	0.341017	0.240271	0.44777
G3BP2				1.23813	0.812101	0.587648	-4.38912			1.59513		0.850504		1.24902	0.812101	0.587648	5.98426		0.850504	-2.53446	1.8342
SON				1.24495	0.320857	0.462525				0.0308691	-0.558821	0.93307		1.25394	0.320857	0.462525	0.0308691	-0.558821	0.93307	0.544068	1.48955
PPIE				1.24902		0.536529				0.882962	-0.326213	0.626449		1.21504		0.536529	0.882962	-0.326213	0.626449	0.481384	1.19481
RUVB2				1.25394	0.212766	0.214456				0.960569	0.395682			1.16533	0.212766	0.214456	0.960569	0.395682		-0.147274	0.37691
CLK3				1.21504	0.446835	-0.163286				0.734686	0.614133	0.945744		1.16329	0.446835	-0.163286	0.734686	0.614133	0.945744	-0.282575	0.95923
2AAA				1.16533	-0.449261	-0.590383				-0.344013	-0.0166232	0.313349		1.17497	-0.449261	-0.590383	-0.344013	-0.0166232	0.313349	0.0608705	0.114444
PHF14				1.16329	-0.223038						-0.89221	-2.0544		1.18769	-0.223038			-0.89221	-2.0544	1.95563	2.59309
SNUT1				1.17497	0.447547	0.438009				0.53644	-0.0177782	0.115594		1.19969	0.447547	0.438009	0.53644	-0.0177782	0.115594	0.483662	2.43294
ZC11A				1.18769	-0.09462	-0.231491				1.11789	0.478647	0.594417		1.2107	-0.09462	-0.231491	1.11789	0.478647	0.594417	-0.435456	1.20795
PRP6				1.19969	1.82079	1.63495				0.6829	0.879933	1.90843		1.20492	1.82079	1.63495	0.6829	0.879933	1.90843	0.396467	1.32149
TCPB				1.2107	-0.226277	0.09922				0.235527	0.249907	0.145228		1.20342	-0.226277	0.09922	0.235527	0.249907	0.145228	0.148567	0.416431
DDX1				1.20492	0.427659	0.297279				-0.389914	-1.72204	0.662692		1.21886	0.427659	0.297279	-0.389914	-1.72204	0.662692	1.13102	2.28708
CN166				1.20342	0.440487	0.917071				0.41545		1.40277		1.23518	0.440487	0.917071	0.41545		1.40277	-0.0448655	0.10393
CD11B				1.21886	0.677365	0.456435				0.44217	0.576494	0.372826		1.25233	0.677365	0.456435	0.44217	0.576494	0.372826	0.331547	2.01859
PB1				1.23518	-0.0278497	0.0133649				0.0885571	0.200304	0.0022884		1.18025	-0.0278497	0.0133649	0.0885571	0.200304	0.0022884	0.291539	0.981044
MPP8				1.25233	-0.0600766	-0.167391						-0.131377		1.1644	-0.0600766	-0.167391			-0.131377	0.443687	#DIV/0!
CRNL1				1.18025	0.593123	0.346178				0.114794	-0.131541	0.0766928		1.11763	0.593123	0.346178	0.114794	-0.131541	0.0766928	0.665662	4.31787
UBF1				1.1644	1.18232	1.60136					-0.457924	1.68668		1.12578	1.18232	1.60136		-0.457924	1.68668	0.688774	1.10855
2ABB				1.11763	0.295269	0.176136				0.235455	0.372442	0.303944		1.11736	0.295269	0.176136	0.235455	0.372442	0.303944	0.225641	1.02385
POGZ				1.12578								-0.797048		1.1321					-0.797048	1.92914	#DIV/0!
CWC22				1.11736	-0.581213	0.622836				1.96557	0.892444	1.9931		1.06155	-0.581213	0.622836	1.96557	0.892444	1.9931	-1.24931	3.18359
IPO5				1.1321	0.156321	0.212676				-1.88348	-0.107223	-0.59038		1.06511	0.156321	0.212676	-1.88348	-0.107223	-0.59038	1.3384	3.44417
ARP3				1.06155	-0.0453723	-0.950019				-0.045738	0.313442	1.31103		1.03662	-0.0453723	-0.950019	-0.045738	0.313442	1.31103	-0.512501	0.981381
KIF19				1.06511	-0.240718	0.234087				-0.175832	-0.866984	-0.338247		1.03768	-0.240718	0.234087	-0.175832	-0.866984	-0.338247	0.804036	2.909
DDX49				1.03662	-0.4659	-0.397				0.148834		0.509113		0.923827	-0.4659	-0.397	0.148834		0.509113	-0.308665	0.639527
SPT6H				1.03768	0.32006	0.802851				0.262132	-0.878327	0.409862		0.934365	0.32006	0.802851	0.262132	-0.878327	0.409862	0.754536	2.57964
UTP20				0.923827	-0.512008	-0.216079				-1.23934	-0.938606	-1.41923		0.941569	-0.512008	-0.216079	-1.23934	-0.938606	-1.41923	1.27022	4.25434
TOP1				0.934365	-0.493278	0.215367					-0.109371			0.954087	-0.493278	0.215367		-0.109371		0.334763	#DIV/0!
SRP68				0.941569	-0.0767613	-0.530506				-0.982005	-1.02934	-0.37399		0.972007	-0.0767613	-0.530506	-0.982005	-1.02934	-0.37399	0.916694	2.87671
CDC73				0.954087	-0.385643	-0.273602				-0.716527	-0.703322	-0.608628		0.977296	-0.385643	-0.273602	-0.716527	-0.703322	-0.608628	0.782176	2.74866
DDX27				0.972007	-0.6909	-0.0377505					0.0428111	-0.402632		0.966952	-0.6909	-0.0377505		0.0428111	-0.402632	0.259344	0.485538
LSG1				0.977296	1.33917	2.01984				-1.04052	1.56884	-0.759872		0.965605	1.33917	2.01984	-1.04052	1.56884	-0.759872	1.51872	2.63984
NAT10			-5.3922	0.966952	-0.278477	-0.0764114				-0.7981	-0.375106	-0.446204		0.967516	-0.278477	5.31579	-0.7981	-0.375106	-0.446204	2.54141	2.25567
ELL				0.965605	-0.114983	-0.765527				0.216006		0.130214		0.922982	-0.114983	-0.765527	0.216006		0.130214	-0.158953	0.288659
1433G				0.967516	1.38393	-0.804873				-1.71912	-0.0669481	1.89106		0.907628	1.38393	-0.804873	-1.71912	-0.0669481	1.89106	0.460565	0.456884
LAP2B				0.922982	1.04338	0.365588					1.26961	1.24648		0.897579	1.04338	0.365588		1.26961	1.24648	-0.489197	2.61487
DDX24				0.907628	-0.160103	-0.47017				-0.700373	-0.686081	-0.733571		0.902493	-0.160103	-0.47017	-0.700373	-0.686081	-0.733571	0.797415	2.96983
PERQ2				0.897579	-0.885531	-1.48702				-0.557842	-1.87763	-0.550076		0.9033	-0.885531	-1.48702	-0.557842	-1.87763	-0.550076	0.505431	0.783551
SK2L2				0.902493	0.883098	0.20844				-0.0197177	0.0100466	-2.07755		0.919146	0.883098	0.20844	-0.0197177	0.0100466	-2.07755	1.36597	2.8988
EXOS7				0.9033	0.16249	0.0184613				0.0691221	0.108494	-0.781513		0.86253	0.16249	0.0184613	0.0691221	0.108494	-0.781513	0.549126	2.10729
RBM28				0.919146	0.0301339	0.531358				0.115564	-0.125064	0.480839		0.837886	0.0301339	0.531358	0.115564	-0.125064	0.480839	0.309346	1.50592
SF3B4				0.86253	-0.663579					0.0795996	-0.441362	-0.143569		0.854662	-0.663579		0.0795996	-0.441362	-0.143569	0.263986	0.537493
VIR				0.837886	0.147743	0.0796702				-1.11562	-0.888905	-0.145536		0.812314	0.147743	0.0796702	-1.11562	-0.888905	-0.145536	1.06326	4.41106
SF3A1				0.854662	-0.915035	-1.74303				-1.34834	-0.868152	-0.678519		0.829132	-0.915035	-1.74303	-1.34834	-0.868152	-0.678519	0.35536	0.569626
TCF20				0.812314	-1.69878	-1.05292								0.845794	-1.69878	-1.05292				#DIV/0!	#DIV/0!
RPB1				0.829132	-0.0281068	0.276473				-1.65218	-2.44319	-2.49797		0.832474	-0.0281068	0.276473	-1.65218	-2.44319	-2.49797	2.55806	8.74205
SYF1				0.845794	-0.586254	-1.01084				-0.312008	-1.2165	-0.518535		0.852568	-0.586254	-1.01084	-0.312008	-1.2165	-0.518535	0.434171	0.925237
FMR1				0.832474	-0.419438							-0.981181		0.828555	-0.419438				-0.981181	1.18574	#DIV/0!
UBP7				0.852568	-0.748425	-1.02131				-1.30252	-2.02389	-1.07446		0.778823	-0.748425	-1.02131	-1.30252	-2.02389	-1.07446	1.13665	2.78555
ACTN1				0.828555	-1.02518						-1.65193	-0.648		0.782289	-1.02518			-1.65193	-0.648	1.02852	1.23577
SPTN1		-6.97362		0.778823	-1.38821	-1.8504			-9.41053	-1.43358	-1.02289	-0.351902		0.805137	5.58541	-1.8504	-1.43358	-1.02289	9.05863	-0.687337	0.194524
HELLS				0.782289	2.52041	2.45308				2.00859	0.483727	1.38245		0.827968	2.52041	2.45308	2.00859	0.483727	1.38245	0.642227	1.26554
LBR				0.805137	2.85883	2.92989				3.08495	2.83071	2.59219		0.836993	2.85883	2.92989	3.08495	2.83071	2.59219	-0.627379	1.24742
ABCF1				0.827968	-0.153208	0.247714				0.493734	-0.156839	-0.0358939		0.857675	-0.153208	0.247714	0.493734	-0.156839	-0.0358939	0.21706	0.800058
CDK12				0.836993	-0.87371	-0.304885				-1.37028	-1.5427	-0.980582		0.782435	-0.87371	-0.304885	-1.37028	-1.5427	-0.980582	1.1658	3.5446
DHX8				0.857675	-1.03748					-1.39588	-1.84343	-0.116996		0.799717	-1.03748		-1.39588	-1.84343	-0.116996	0.999886	1.42416
GPTC8				0.782435	-2.08219	-2.09575				-1.83141	-0.907923	-0.955247		0.712565	-2.08219	-2.09575	-1.83141	-0.907923	-0.955247	0.076405	0.0867277
CPSF2				0.799717	-2.22152	-2.26643					-2.25283	-1.15194		0.733659	-2.22152	-2.26643		-2.25283	-1.15194	0.450952	0.396718
MOV10				0.712565	-0.0436552	-1.49101						-1.26167		0.757091	-0.0436552	-1.49101			-1.26167	1.00247	#DIV/0!
MYPT1				0.733659	-0.716685	0.332175				1.06332	0.329559	-1.84131		0.750633	-0.716685	0.332175	1.06332	0.329559	-1.84131	0.271518	0.331925
ACL6A				0.757091	-1.10871	-0.568004								0.787744	-1.10871	-0.568004				#DIV/0!	#DIV/0!
TRM1L				0.750633	-1.99948	-1.48266				-1.13271	-1.22959	-1.01211		0.786602	-1.99948	-1.48266	-1.13271	-1.22959	-1.01211	0.226291	0.312935
PRC2C				0.787744	-1.63452	-1.50934					-1.86469	-1.77719		0.821409	-1.63452	-1.50934		-1.86469	-1.77719	1.04679	1.37738
IF4G1				0.786602	-0.170269	-0.512585				-1.9475	-1.50332	-0.1302		0.858158	-0.170269	-0.512585	-1.9475	-1.50332	-0.1302	1.25211	2.82164
MSH6				0.821409	-1.51461	-1.53679				-1.89607	-1.95928	-1.72809		0.813547	-1.51461	-1.53679	-1.89607	-1.95928	-1.72809	1.1152	2.13675
DNJA3				0.858158		-2.01668				-1.29534		-1.00715		0.662971		-2.01668	-1.29534		-1.00715	0.474392	0.39889
DHX29				0.813547	-0.862402	-1.02356				-1.4555	-1.26898	-1.19577		0.68304	-0.862402	-1.02356	-1.4555	-1.26898	-1.19577	0.905779	2.51786
MINA				0.662971	-1.06385	-0.932564				0.359388	0.182552	-0.141646		0.677064	-1.06385	-0.932564	0.359388	0.182552	-0.141646	-0.573214	1.40382
INT3				0.68304	-2.38541	-2.55372						-2.78122		0.704883	-2.38541	-2.55372			-2.78122	1.36981	#DIV/0!
NOG1				0.677064	-0.708494	-1.56843				-1.56905				0.554932	-0.708494	-1.56843	-1.56905			0.995056	#DIV/0!
DNLI3				0.704883	-1.95031	-1.89807				-1.95493	-2.03237	-1.7281		0.590563	-1.95031	-1.89807	-1.95493	-2.03237	-1.7281	0.819192	1.37194
SND1				0.554932	-2.28976	-2.08631				-2.59581	-1.79033	-1.70518		0.653337	-2.28976	-2.08631	-2.59581	-1.79033	-1.70518	0.789525	1.08922
ICE2				0.590563	-2.17296	-2.70701				-1.99509	-2.33392	-1.84838		0.571952	-2.17296	-2.70701	-1.99509	-2.33392	-1.84838	0.623124	0.794927
DDX47				0.653337	-2.40075	-2.4593				-1.9841				0.517346	-2.40075	-2.4593	-1.9841			0.536533	#DIV/0!
IF4G2				0.571952	-2.53244	-2.80137				-3.13883	-3.35657	-3.22371		0.489938	-2.53244	-2.80137	-3.13883	-3.35657	-3.22371
ATRX				0.517346	-2.57252	-4.06747					-3.54901	-4.05805		0.49407	-2.57252	-4.06747		-3.54901	-4.05805
JADE1				0.489938	-2.76791	-2.8692								0.603252	-2.76791	-2.8692
ZO1				0.49407	-3.76112	-3.94248				-3.56829	-3.49646	-1.03558		0.383018	-3.76112	-3.94248	-3.56829	-3.49646	-1.03558
GEMI5				0.603252	-2.5628	-3.56808				-3.7135	-3.16327	-3.23694		0	-2.5628	-3.56808	-3.7135	-3.16327	-3.23694
NIPBL		-4.04957		0.383018	-4.5151	-1.24928	-4.3829			-0.643327		-4.29026			-0.465539	-1.24928	3.73957		-4.29026
FLII				0	-0.652494	-2.10818				-1.31032	-0.798079	0.204975			-0.652494	-2.10818	-1.31032	-0.798079	0.204975
MMS22					-4.88947	-4.63267				-4.3282	-3.81182	-4.0145			-4.88947	-4.63267	-4.3282	-3.81182	-4.0145
DJC21														#VALUE!
MORC3					-1.91737	-2.5028						-2.44475		#VALUE!	-1.91737	-2.5028			-2.44475
KV2A6	0.2135	-0.391293	-1.21034				-0.935206	-0.496493	-0.060885					#VALUE!	#VALUE!	#VALUE!	#VALUE!	#VALUE!	#VALUE!
KV5A3	3.59885	3.55068	3.56116				3.3713	3.42438	3.69262					#VALUE!	#VALUE!	#VALUE!	#VALUE!	#VALUE!	#VALUE!
KV5A4	3.50479	3.6237	3.59993			1.18299	3.49103	3.53546	3.80873					#VALUE!	#VALUE!	-2.41694	#VALUE!	#VALUE!	#VALUE!
KV5A6	2.05004	2.58135	2.53793				2.35974	2.24744	2.56263					#VALUE!	#VALUE!	#VALUE!	#VALUE!	#VALUE!	#VALUE!
KV5A7	1.42439	2.2121	2.29631				2.07409	2.21685	-0.229446						#VALUE!	#VALUE!	#VALUE!	#VALUE!	#VALUE!
KV5AC	4.55533	4.51319	4.39639				4.30465	2.23033	4.3342						#VALUE!	#VALUE!	#VALUE!	#VALUE!	#VALUE!
KV5AE		-0.0197267	-1.29513												#VALUE!	#VALUE!
KV5AF		0.197611	-0.138886				0.758816	-0.286577						#VALUE!	#VALUE!	#VALUE!	#VALUE!	#VALUE!
KV3A4							0.113489		0.330572					#VALUE!			#VALUE!		#VALUE!
KV3A5	2.98146	2.98032	3.3946				3.40448	3.61033	3.60334					#VALUE!	#VALUE!	#VALUE!	#VALUE!	#VALUE!	#VALUE!
KV3A8	1.55631	1.96029	1.7194				1.4808	1.67091	1.68069					#VALUE!	#VALUE!	#VALUE!	#VALUE!	#VALUE!	#VALUE!
KV3AB	0.87496	0.526081	1.17652				0.821185	0.524758	0.631271					#VALUE!	#VALUE!	#VALUE!	#VALUE!	#VALUE!	#VALUE!
KV3AG	0.312947	0.529765	0.311319				0.17092	-0.213822	0.212687					#VALUE!	#VALUE!	#VALUE!	#VALUE!	#VALUE!	#VALUE!
KV3AM	0.678637		1.53954				1.34026	1.18523	1.22585					#VALUE!		#VALUE!	#VALUE!	#VALUE!	#VALUE!
KV6A5	-1.08714	-1.00615						-1.02065							#VALUE!			#VALUE!
LV1A	1.94647	2.58289	-0.113251				1.86244	2.40931	2.63623					#VALUE!	#VALUE!	#VALUE!	#VALUE!	#VALUE!	#VALUE!
LV1C		-1.19975	-0.753794				-0.921725	-1.23193	-0.541252					#VALUE!	#VALUE!	#VALUE!	#VALUE!	#VALUE!	#VALUE!
HVM03	1.18796	0.637697	0.303299				1.19887	0.862238	-4.10142					#VALUE!	#VALUE!	#VALUE!	#VALUE!	#VALUE!	#VALUE!
HVM06	0.636171	0.383715							1.39511					#VALUE!	#VALUE!				#VALUE!
HVM16	-1.55918	-0.0545357	-0.117161				0.0544044	-0.470405	-0.281749					#VALUE!	#VALUE!	#VALUE!	#VALUE!	#VALUE!	#VALUE!
HVM17	2.16897	2.85752	3.19556				2.09873	2.50808	2.06536					#VALUE!	#VALUE!	#VALUE!	#VALUE!	#VALUE!	#VALUE!
HVM36	3.09341	3.02472	3.06263				0.901886	3.11091	0.930597					#VALUE!	#VALUE!	#VALUE!	#VALUE!	#VALUE!	#VALUE!
HVM40	0.562972	0.745317	0.776734				0.350314	0.410079	0.273836					#VALUE!	#VALUE!	#VALUE!	#VALUE!	#VALUE!	#VALUE!
LAC1	0.930409	0.0137658	1.40799				0.583733	1.14838	1.14817					#VALUE!	#VALUE!	#VALUE!	#VALUE!	#VALUE!	#VALUE!
LAC3	1.70577	-0.357145	1.21504			-0.749613	0.747178	0.170674	-1.70685					#VALUE!	#VALUE!	-1.96465	#VALUE!	#VALUE!	#VALUE!
GCAA	5.94533	6.3818	6.35568		0.399866	0.767364	6.67148	4.49057	6.47499					#VALUE!	-5.98193	-5.58831	#VALUE!	#VALUE!	#VALUE!
GCAB	0.59713	2.61978	3.22716				3.25803	2.90452	2.02898						#VALUE!	#VALUE!	#VALUE!	#VALUE!	#VALUE!
IGG2B	3.97757	4.1234	4.29289		2.0517	0.416415	4.06804	4.07522	3.55097			-0.152111		#VALUE!	-2.0717	-3.87648	#VALUE!	#VALUE!	-3.70308
MYCN
KV6AB	1.49346	1.5789	1.68481				0.956759	1.19036	0.866552					#VALUE!	#VALUE!	#VALUE!	#VALUE!	#VALUE!	#VALUE!
HVM52		5.59049	0.48766			0.496906	5.70978	0.16769	5.75959					#VALUE!	#VALUE!	0.00924595	#VALUE!	#VALUE!	#VALUE!
HVM51	6.3345	6.84338	6.76708		1.70668	2.23625	6.62021	6.52343	6.73687	3.92243	3.39681	2.36752			-5.1367	-4.53084	-2.69779	-3.12662	-4.36935
TTHY	-1.58063	-0.582168					-1.21934		-0.860295					#VALUE!	#VALUE!		#VALUE!		#VALUE!
ZFP2						1.25942					2.31957			#VALUE!		1.25942		2.31957
HVM54	1.4091	1.64295	1.89005				1.79446		1.7818					#VALUE!	#VALUE!	#VALUE!	#VALUE!		#VALUE!
HVM56	2.72003	3.43363	3.64326				2.76012	3.03981	2.76562					#VALUE!	#VALUE!	#VALUE!	#VALUE!	#VALUE!	#VALUE!
HVM57	5.78701	6.34444	5.97044				5.12699	5.48565	5.41651						#VALUE!	#VALUE!	#VALUE!	#VALUE!	#VALUE!
HVM60	4.53533	4.95587					4.43474	6.48015	5.86967						#VALUE!		#VALUE!	#VALUE!	#VALUE!
H2AX
SUH					1.43932	0.939535						1.55312		#VALUE!	1.43932	0.939535			1.55312
NEDD4					-1.4208					-1.93882	-2.44318				-1.4208		-1.93882	-2.44318
EPB42	-1.15455								0.151099										#VALUE!
ROA1
RPB9					-0.0136661	0.349036						1.03212			-0.0136661	0.349036			1.03212
TBB4B					2.62608	3.26333		0.201862		1.79527	1.58817	3.00015			2.62608	3.26333	1.79527	1.3863	3.00015
RL36A					6.79964	6.81373				6.50235	6.43665	6.55836			6.79964	6.81373	6.50235	6.43665	6.55836
ALK														#VALUE!
SMRCD					-1.41994							-1.75855			-1.41994				-1.75855
MPRI	-3.16297	-3.53728	-2.3474		0.897045	0.760154	-3.17072	-0.812518		0.480916	0.542352	0.867145		#VALUE!	4.43433	3.10756	3.65163	1.35487	0.867145
ZSC10					-2.32346	-2.93702									-2.32346	-2.93702
K22O	2.72287	2.34412	0.592114		2.46102	2.0041	4.21801			3.1445		3.83176			0.116899	1.41198	-1.07351		3.83176
PR38A					1.94907	2.47258				1.35254	2.28874	2.57133			1.94907	2.47258	1.35254	2.28874	2.57133
ZN827					0.958703	0.622136				0.748879	-0.237583	1.54641			0.958703	0.622136	0.748879	-0.237583	1.54641
RBM27										-2.4585		-2.37424					-2.4585		-2.37424
MYO1D					-2.73043										-2.73043
ZN638					-2.44258						-2.96934	-2.14465		#VALUE!	-2.44258			-2.96934	-2.14465
SMRD1						-0.167276										-0.167276
RO52	-0.582739	0.420406	-0.291297				-1.71357	1.55335	-1.41042		-0.53194				#VALUE!	#VALUE!	#VALUE!	-2.08529	#VALUE!
SPTB2					-3.69776	-3.60609				-2.44503	-1.78215	-1.40016			-3.69776	-3.60609	-2.44503	-1.78215	-1.40016
CLH1						-3.37372					-3.58674	-2.37236		#VALUE!		-3.37372		-3.58674	-2.37236
TASOR					-2.83784	-3.30933				-4.29563	-3.137	-2.08472		#VALUE!	-2.83784	-3.30933	-4.29563	-3.137	-2.08472
UBP34	-3.33027	-2.9896									-1.82423				#VALUE!			-1.82423
GP119	1.61195	1.89296	3.55564				3.54388		2.31789						#VALUE!	#VALUE!	#VALUE!		#VALUE!
SDCG8
SRA1					1.16374	1.46508				2.89456	2.16752	2.29422			1.16374	1.46508	2.89456	2.16752	2.29422
SMG1			-3.46225				-2.86704	-2.13237	-2.629					#VALUE!		#VALUE!	#VALUE!	#VALUE!	#VALUE!
NOP9						-1.80937				-2.0262						-1.80937	-2.0262
MA2A2	-1.55585	-2.11663	-1.19051				-1.3462		-0.191372						#VALUE!	#VALUE!	#VALUE!		#VALUE!
NOB1					-0.011974						-1.20282				-0.011974			-1.20282
GPR22					-0.271503				0	0.334701	0.095877	0.452558			-0.271503		0.334701	0.095877	0.452558
IIGP5					0.848072						1.628				0.848072			1.628
ZN536		-1.11883	-0.731828				-0.446791	0				-2.27178			#VALUE!	#VALUE!	#VALUE!	#VALUE!	-2.27178
MK67I					0.343666	-0.174476									0.343666	-0.174476
WASL
EXOS4					1.41935	0.812924				2.11587	0.94917	0.871903			1.41935	0.812924	2.11587	0.94917	0.871903
NOG2					-1.04036	-1.30785				-1.23454	-0.856694	-0.894528			-1.04036	-1.30785	-1.23454	-0.856694	-0.894528
PWP1					0.34858	-0.0856152					-0.988315	-0.0982268			0.34858	-0.0856152		-0.988315	-0.0982268
UBQL4
ANR17					-3.09617	-4.21626				-3.16492		-3.51309			-3.09617	-4.21626	-3.16492		-3.51309
PRPS1					0.138188	-0.394158				0.187112		0.0163039			0.138188	-0.394158	0.187112		0.0163039
CHTOP
NH2L1					2.67601	2.20007					2.0944	3.08691			2.67601	2.20007		2.0944	3.08691
SPF27										1.86256	1.52706	2.06969					1.86256	1.52706	2.06969
CUL2
PPIH					0.669913	-0.0600974				0.351969	0.739761				0.669913	-0.0600974	0.351969	0.739761
PRP17										-1.93388		-0.474595					-1.93388		-0.474595
SET					0.602253	0.603338									0.602253	0.603338
NUSAP		-1.15729	-1.29399				-1.66133								#VALUE!	#VALUE!	#VALUE!
HTRA2					1.13146	0.894567				0	1.11323	0.152834			1.13146	0.894567	0	1.11323	0.152834
ADDG												-0.183408		#VALUE!					-0.183408
TNNI1
NFS1	0	0	0				0							0	#VALUE!	#VALUE!	#VALUE!
DX39B					0	0					0	0		0	0	0		0	0
