# Supplementary material for: Cleavage of histone H2A during embryonic stem cell differentiation destabilizes nucleosomes to counteract gene activation
Source: J Biol Chem. 2026 Apr 9;302(6):111437. doi: 10.1016/j.jbc.2026.111437 (PMC13156748; doi:10.1016/j.jbc.2026.111437)
Supplement: Data S9 [file mmc12.xlsx]

## Sheet: Sheet1
PTMs	1_FL_1	5_FL_3	3_FL_2	2_L23_1	4_L23_2	6_L23_3	pval
H31K36me3	0.059489	0.052133	0.055138	0.102029	0.100352	0.110967	12.0267
H3K56me1	0	0.000257	0.000623	0.013959	0.013766	0.010408	11.145
H3K4me3	0.001893	0.002739	0.003097	0	0	0	8.99923
H3K122ac	0.008977	0.000936	0.025017	0.84042	0.502896	0.641463	8.53118
H3K9ac	0.01027	0.002108	0.007015	0.042918	0.037668	0.029123	8.39316
H3K9me1	0.206438	0.183195	0.191615	0.008597	0.093688	0.067803	7.31531
H31K27me3	0.130547	0.123354	0.112925	0.03669	0.051089	0.083515	6.43556
H3K23ac	0.192312	0.18237	0.134043	0.382632	0.283805	0.256505	5.01051
H31K36me2	0.438386	0.359086	0.395916	0.18127	0.310589	0.274895	4.88524
H33K27me1	0.22359	0.201693	0.113514	0	0.097346	0.054783	4.55614
H3K14ac	0.121653	0.121089	0.087852	0.37038	0.197006	0.227692	4.41101
H3K4me1	0.198068	0.165651	0.182278	0.074634	0.151849	0.127157	4.06496
H4K20me3	0.046342	0.037592	0.029968	0.021658	0.016676	0.030415	3.78935
H3K9me2	0.397027	0.461401	0.435941	0.635139	0.490025	0.513759	3.6853
H31K27me1	0.213104	0.196601	0.202237	0.039562	0.134393	0.168878	3.59533
H4K20me1	0.432079	0.438666	0.479183	0.414487	0.416508	0.420814	3.43727
H4K16ac	0.261282	0.26341	0.263678	0.262087	0.372411	0.340689	2.93825
H3K9me3	0.1731	0.190145	0.189459	0.1605	0.156367	0.1815	2.92863
H31K36me1	0.233178	0.273618	0.202659	0.087327	0.180802	0.208163	2.86125
H3K79me2	0	0.029213	0.034586	0	0.001831	0.004874	2.69923
H4K8ac	0.006189	0.042714	0.012632	2.2e-05	0.003122	0.000448	2.62132
H31K27me2	0.531867	0.529821	0.528641	0.672321	0.584514	0.530873	2.42781
H3K56me2	0.014615	0.001048	0.000295	0	0.041525	0.054401	2.37165
H33K36me1	0.122075	0.186998	0.167112	0	0.153461	0.103941	2.23879
H3K56ac	0.000104	0.001052	0.000232	0.003963	0	0.002641	2.17365
H3K79me1	0.12104	0.085195	0.071005	0.077925	0.039115	0.079095	2.0294
H3K4ac	0.000142	0.001368	0.00046	0	0	0.000417	1.95517
H3K79me3	0	6.2e-05	0.001484	0.004447	0	0.001587	1.54823
H4K5ac	0.034357	0.020139	0.027154	0.149846	0.03362	0.022181	1.43318
H33K27ac	0	0.000406	0	0	0	0	1.41927
H3K79ac	0	0.000486	0	0	0	0	1.41927
H4K20ac	0	1.9e-05	0	0	0	0	1.41927
H3K4me2	0.007815	0.010132	0.011604	0.008091	0.010804	0.005413	1.28148
H33K27me2	0.478276	0.360398	0.529268	0.534	0.333456	0.254856	1.16455
H31K27ac	0.000436	0.001664	9.3e-05	0.012189	0	0	1.11693
H3K56me3	0.000431	0	0	0	0	0.001748	0.985622
H4K20me2	0.225748	0.135068	0.128624	0.22623	0.171306	0.167871	0.923461
H3K18ac	0.03006	0.037982	0.028346	0.04457	0.032299	0.002415	0.555201
H33K36me3	0.065552	0.06615	0.111135	0	0.179561	0.131102	0.502919
H33K27me3	0.119483	0.103703	0.081444	0	0	0.235042	0.351129
H3K23me1	0.018859	4.3e-05	0.000149	0.0199	0.002708	0.002672	0.288481
H3K18me1	0.021276	3.7e-05	7.9e-05	0.022381	0.001613	0.001547	0.158916
H4K12ac	0.021319	0.052001	0.021104	0.004434	0.038496	0.047152	0.0974475
H33K36me2	0.605506	0.535014	0.441582	0.629508	0.527106	0.427358	0.00899323
